# Supplementary material for: Iron-mediated one-pot formal nitrocyclization onto unactivated alkenes
Source: Royal Society of Chemistry journal article supplement (doi:10.1039/c0ob00905a), 2010-11-18

## Supporting Information

### **Iron-mediated one-pot formal nitrocyclization onto unactivated alkenes**

**Tsuyoshi Taniguchi,\* Tatsuya Fujii and Hiroyuki Ishibashi**

*School of Pharmaceutical Sciences, Institute of Medical, Pharmaceutical and Health Sciences,*

*Kanazawa University, Kakuma-machi, Kanazawa 920-1192, Japan.*

*Fax: +81-76-234-4439; Tel: +81-76-234-4439; E-mail: tsuyoshi@p.kanazawa-u.ac.jp*

## Table of Contents

|                                                                  |         |
|------------------------------------------------------------------|---------|
| General methods                                                  | S3      |
| Experimental detail                                              | S3-S8   |
| References                                                       | S8      |
| <sup>1</sup> H NMR and <sup>13</sup> C NMR spectrum of <b>2a</b> | S9-S10  |
| <sup>1</sup> H NMR and <sup>13</sup> C NMR spectrum of <b>2b</b> | S11-S12 |
| <sup>1</sup> H NMR and <sup>13</sup> C NMR spectrum of <b>2c</b> | S13-S14 |
| <sup>1</sup> H NMR and <sup>13</sup> C NMR spectrum of <b>2d</b> | S15-S16 |
| <sup>1</sup> H NMR and <sup>13</sup> C NMR spectrum of <b>2e</b> | S17-S18 |
| <sup>1</sup> H NMR and <sup>13</sup> C NMR spectrum of <b>2f</b> | S19-S20 |
| <sup>1</sup> H NMR and <sup>13</sup> C NMR spectrum of <b>2g</b> | S21-S22 |
| <sup>1</sup> H NMR and <sup>13</sup> C NMR spectrum of <b>2h</b> | S23-S24 |
| <sup>1</sup> H NMR and <sup>13</sup> C NMR spectrum of <b>2i</b> | S25-S26 |
| <sup>1</sup> H NMR and <sup>13</sup> C NMR spectrum of <b>2j</b> | S27-S28 |
| <sup>1</sup> H NMR and <sup>13</sup> C NMR spectrum of <b>2k</b> | S29-S30 |
| <sup>1</sup> H NMR and <sup>13</sup> C NMR spectrum of <b>2l</b> | S31-S32 |
| <sup>1</sup> H NMR and <sup>13</sup> C NMR spectrum of <b>2m</b> | S33-S34 |
| <sup>1</sup> H NMR and <sup>13</sup> C NMR spectrum of <b>2n</b> | S35-S36 |
| <sup>1</sup> H NMR and <sup>13</sup> C NMR spectrum of <b>2p</b> | S37-S38 |
| <sup>1</sup> H NMR and <sup>13</sup> C NMR spectrum of <b>2q</b> | S39-S40 |
| <sup>1</sup> H NMR and <sup>13</sup> C NMR spectrum of <b>2r</b> | S41-S42 |
| <sup>1</sup> H NMR and <sup>13</sup> C NMR spectrum of <b>3</b>  | S43-S44 |

**General.** All reactions were carried out in a flame-dried glassware under nitrogen atmosphere. Amines were distilled over calcium hydride. All reagents were purchased commercially and used without further purification. Melting points are uncorrected. IR spectra were recorded on a commercial FT/IR spectrometer.  $^1\text{H}$  NMR spectra were recorded at 600 and 400 MHz spectrometers; chemical shifts ( $\delta$ ) are quoted relative to tetramethylsilane.  $^{13}\text{C}$  NMR spectra were recorded at 150 and 100 MHz spectrometers with complete proton decoupling; chemical shift ( $\delta$ ) are quoted relative to the residual signals of chloroform. Silica gel column chromatography was carried out on silica gel 60N. Mass spectra were recorded on a high-resolution mass spectrometer in fast atom bombardment mode (FAB).

**Starting materials.** **1l** was commercially available. **1a**,<sup>1</sup> **1b**,<sup>2</sup> **1c**,<sup>2</sup> **1d**,<sup>2</sup> **1e**,<sup>2</sup> **1f**,<sup>3</sup> **1g**,<sup>2</sup> **1h**,<sup>3</sup> **1i**,<sup>4</sup> **1j**,<sup>5</sup> **1k**,<sup>1</sup> **1m**,<sup>2</sup> **1n**,<sup>2</sup> **1o**,<sup>6</sup> **1p**,<sup>7</sup> **1q**<sup>8</sup> and **1r**<sup>6</sup> were prepared according to literatures.

**1-(4-Methylphenylsulfonyl)-2-nitromethylpyrrolidine (2a).** 70% yield. Colourless crystals, mp 91.5–92 °C (hexane-EtOAc). IR ( $\text{CHCl}_3$ )  $\nu$  1560, 1352, 1161  $\text{cm}^{-1}$ ;  $^1\text{H}$  NMR (400 MHz,  $\text{CDCl}_3$ )  $\delta$  1.63–1.68 (1H, m), 1.80–1.87 (3H, m), 2.46 (3H, s), 3.09–3.15 (1H, m), 3.47–3.52 (1H, m), 4.16–4.21 (1H, m), 4.41 (1H, dd,  $J = 12.7, 9.8$  Hz), 4.93 (1H, dd,  $J = 12.7, 3.9$  Hz), 7.37 (2H, d,  $J = 8.0$  Hz), 7.76 (2H, d,  $J = 8.0$  Hz);  $^{13}\text{C}$  NMR (100 MHz,  $\text{CDCl}_3$ )  $\delta$  21.5, 23.5, 29.8, 49.3, 56.8, 78.5, 127.6, 130.0, 133.1, 144.2. Anal. Calcd for  $\text{C}_{12}\text{H}_{16}\text{N}_2\text{O}_4\text{S}$ : C, 50.69; H, 5.67; N, 9.85. Found: C, 50.49; H, 5.62; N, 9.82.

**4,4-Dimethyl-1-(4-methylphenylsulfonyl)-2-nitromethylpyrrolidine (2b)** :75% yield. Colourless crystals, mp 117.5–118 °C (hexane-EtOAc). IR ( $\text{CHCl}_3$ )  $\nu$  1553, 1352, 1219, 1159  $\text{cm}^{-1}$ ;  $^1\text{H}$  NMR (400 MHz,  $\text{CDCl}_3$ )  $\delta$  0.52 (3H, s), 1.07 (3H, s), 1.67 (1H, dd,  $J = 12.7, 8.0$  Hz), 1.86 (1H, dd,  $J = 12.7, 7.3$  Hz), 2.46 (3H, s), 3.06 (1H, d,  $J = 10.5$  Hz), 3.22 (1H, d,  $J = 10.5$  Hz), 4.12–4.20 (1H, m), 4.49 (1H, dd,  $J = 12.7, 9.0$  Hz), 5.20 (1H, dd,  $J = 12.7, 8.5$  Hz), 7.37 (2H, d,  $J = 8.0$  Hz), 7.76 (2H, d,  $J = 8.0$  Hz);  $^{13}\text{C}$  NMR (100 MHz,  $\text{CDCl}_3$ )  $\delta$  21.6, 25.5, 26.2, 37.6, 44.6, 56.7, 61.4, 79.7, 127.7, 129.9, 133.4, 144.3. Anal. Calcd for  $\text{C}_{14}\text{H}_{20}\text{N}_2\text{O}_4\text{S}$ : C, 53.83; H, 6.45; N, 8.97. Found: C, 53.80; H, 6.41; N, 8.88.

**4,4-Diphenyl-1-(4-methylphenylsulfonyl)-2-nitromethylpyrrolidine (2c).** 48% yield. Colourless crystals, mp 202.5–203 °C (hexane-EtOAc). IR ( $\text{CHCl}_3$ )  $\nu$  1553, 1352, 1228, 1163  $\text{cm}^{-1}$ ;  $^1\text{H}$  NMR (400 MHz,  $\text{CDCl}_3$ )  $\delta$  2.42 (3H, s), 2.57 (1H, d,  $J = 13.2$  Hz), 2.74

(1H, dd,  $J = 13.2, 8.3$  Hz), 3.39 (1H, d,  $J = 10.2$  Hz), 3.77 (1H, dd,  $J = 13.2, 10.2$  Hz), 4.25–4.31 (1H, m), 4.54 (1H, d,  $J = 10.0$  Hz), 4.86 (1H, dd,  $J = 13.2, 3.9$  Hz), 7.05 (2H, d,  $J = 7.6$  Hz), 7.14–7.32 (10H, m), 7.67 (2H, d,  $J = 8.3$  Hz);  $^{13}\text{C}$  NMR (100 MHz,  $\text{CDCl}_3$ )  $\delta$  21.6, 41.5, 52.2, 56.1, 57.8, 78.1, 126.2, 126.6, 126.8, 127.2, 127.7, 128.8, 129.0, 130.0, 132.3, 143.7, 144.0, 144.3; HRFABMS calcd for  $\text{C}_{24}\text{H}_{25}\text{N}_2\text{O}_4\text{S}$  ( $\text{M}^+\text{+H}$ ) 437.1535, found: 437.1527.

**1-(4-Methylphenylsulfonyl)-2-nitromethyl-4-phenylpyrrolidine (2d).** 75% yield (as a mixture of two isomers, 57:43). Colourless oil. IR ( $\text{CHCl}_3$ )  $\nu$  1552, 1352, 1224, 1161  $\text{cm}^{-1}$ ;  $^1\text{H}$  NMR (400 MHz,  $\text{CDCl}_3$ )  $\delta$  1.89 (1H, td,  $J = 12.9, 8.8$  Hz, major), 2.00 (1H, td,  $J = 11.5, 8.8$  Hz, minor), 2.21 (1H, dd,  $J = 13.2, 6.1$  Hz, major), 2.46 (3H, s, major), 2.47 (3H, s, minor), 2.48–2.53 (1H, m, minor), 2.67–2.73 (1H, m, minor), 2.96 (1H, dd,  $J = 10.7, 9.0$  Hz, major), 3.42 (1H, t,  $J = 10.7$  Hz, major), 3.43–3.51 (1H, m, minor), 3.82 (1H, dd,  $J = 11.7, 7.3$  Hz, minor), 3.89 (1H, t-like,  $J = 8.0$  Hz, major), 4.23–4.30 (1H, m, minor), 4.36 (1H, td,  $J = 8.8, 3.9$  Hz, major), 4.53 (1H, d,  $J = 12.7$  Hz, major), 4.55 (1H, dd,  $J = 12.9, 2.0$  Hz, minor), 4.99 (1H, dd,  $J = 12.9, 3.9$  Hz, major), 5.08, (1H, dd,  $J = 12.9, 4.1$  Hz, minor), 7.03 (2H, d,  $J = 6.3$  Hz, major), 7.08 (2H, d,  $J = 7.0$  Hz, minor), 7.22–7.29 (5H, m), 7.35–7.41 (5H, m), 7.76 (2H, d,  $J = 8.3$  Hz, major), 7.80 (2H, d,  $J = 8.6$  Hz, minor);  $^{13}\text{C}$  NMR (100 MHz,  $\text{CDCl}_3$ )  $\delta$  21.5, 21.6, 35.8, 38.0, 41.0, 42.6, 54.9, 55.0, 56.6, 57.2, 78.3, 79.1, 126.8, 126.8, 127.4, 127.6, 127.7, 128.3, 128.7, 128.7, 130.0, 132.4, 133.5, 138.0, 138.1, 144.4, 144.5; HRFABMS calcd for  $\text{C}_{18}\text{H}_{21}\text{N}_2\text{O}_4\text{S}$  ( $\text{M}^+\text{+H}$ ) 361.1222, found: 361.1226.

**2-(4-Methylphenylsulfonyl)-3-nitromethylspiro[4,5]decane (2e).** 69% yield. Colourless crystals, mp 118.5–119 °C (hexane-EtOAc). IR ( $\text{CHCl}_3$ )  $\nu$  1553, 1352, 1221, 1159  $\text{cm}^{-1}$ ;  $^1\text{H}$  NMR (400 MHz,  $\text{CDCl}_3$ )  $\delta$  0.59–0.63 (1H, m), 0.78 (1H, ddd,  $J = 13.3, 9.2, 3.9$  Hz), 1.10–1.50 (8H, m), 1.61 (1H, dd,  $J = 13.3, 8.3$  Hz), 1.91 (1H, dd,  $J = 12.9, 7.6$ ), 2.45 (3H, s), 3.19 (1H, d,  $J = 11.0$  Hz), 3.24 (1H, d,  $J = 11.0$  Hz), 4.09 (1H, ddd,  $J = 16.8, 7.8, 4.1$  Hz), 4.45 (1H, dd,  $J = 12.7, 9.0$  Hz), 5.19 (1H, dd,  $J = 12.7, 4.1$  Hz), 7.36 (2H, d,  $J = 8.0$  Hz), 7.76 (2H, d,  $J = 8.0$  Hz);  $^{13}\text{C}$  NMR (100 MHz,  $\text{CDCl}_3$ )  $\delta$  21.6, 22.8, 23.5, 25.6, 33.9, 36.0, 41.5, 42.8, 56.0, 58.6, 79.9, 127.7, 129.9, 133.3, 144.2. Anal. Calcd for  $\text{C}_{17}\text{H}_{24}\text{N}_2\text{O}_4\text{S}$ : C, 57.93; H, 6.86; N, 7.95. Found: C, 58.01; H, 6.75; N, 8.02.

**(2R\*,5S\*)-1-(4-Methylphenylsulfonyl)-2-nitromethyl-5-phenylpyrrolidine (2f).** 80% yield. Colourless crystals, mp 117–117.5 °C (hexane-EtOAc). IR ( $\text{CHCl}_3$ )  $\nu$  1553, 1356, 1225, 1163  $\text{cm}^{-1}$ ;  $^1\text{H}$  NMR (400 MHz,  $\text{CDCl}_3$ )  $\delta$  1.71–1.76 (1H, m), 1.86–1.93 (3H, m),

2.43 (3H, s), 4.36–4.43 (1H, m), 4.49 (1H, dd,  $J = 12.4, 9.3$  Hz), 4.71 (1H, t-like,  $J = 6.3$  Hz), 5.04 (1H, dd,  $J = 12.4, 4.4$  Hz), 7.25–7.34 (7H, m), 7.71 (2H, d,  $J = 8.0$  Hz);  $^{13}\text{C}$  NMR (100 MHz,  $\text{CDCl}_3$ )  $\delta$  21.4, 28.6, 33.5, 58.4, 64.8, 78.9, 125.9, 127.4, 127.6, 128.4, 129.9, 133.4, 140.9, 144.3. Anal. Calcd for  $\text{C}_{18}\text{H}_{20}\text{N}_2\text{O}_4\text{S}$ : C, 59.98; H, 5.59; N, 7.77. Found: C, 59.70; H, 5.55; N, 7.65.

**1-(4-Methylphenylsulfonyl)-2-nitromethyl-2,4,4-trimethylpyrrolidine (2g).** 45% yield. Colourless oil. IR ( $\text{CHCl}_3$ )  $\nu$  1553, 1343, 1221, 1156  $\text{cm}^{-1}$ ;  $^1\text{H}$  NMR (400 MHz,  $\text{CDCl}_3$ )  $\delta$  0.99 (3H, s), 1.07 (3H, s), 1.62 (3H, s), 1.65 (1H, d,  $J = 13.7$  Hz), 2.36 (1H, d,  $J = 13.7$  Hz), 2.44 (3H, s), 3.07 (1H, d,  $J = 10.0$  Hz), 3.12 (1H, d,  $J = 10.0$  Hz), 4.80 (1H, d,  $J = 11.2$  Hz), 5.03 (1H, d,  $J = 11.2$  Hz), 7.31 (2H, d,  $J = 8.0$  Hz), 7.75 (2H, d,  $J = 8.0$  Hz);  $^{13}\text{C}$  NMR (100 MHz,  $\text{CDCl}_3$ )  $\delta$  21.5, 25.2, 27.1, 27.3, 36.2, 51.4, 61.2, 65.9, 83.3, 127.4, 129.6, 137.0, 143.7; HRFABMS calcd for  $\text{C}_{15}\text{H}_{23}\text{N}_2\text{O}_4\text{S}$  ( $\text{M}^+\text{+H}$ ) 327.1379, found: 327.1372.

**1-(Benzyloxycarbonyl)-2-nitromethylpyrrolidine (2h).** 31% yield. Colourless oil. IR ( $\text{CHCl}_3$ )  $\nu$  1703, 1559, 1414, 1358, 1129  $\text{cm}^{-1}$ ;  $^1\text{H}$  NMR (400 MHz,  $\text{CDCl}_3$ )  $\delta$  1.88–1.97 (3H, m), 2.11–2.19 (1H, m), 3.45 (2H, br-t,  $J = 6.1$  Hz), 4.27 (1H, br-t,  $J = 10.5$  Hz), 4.41–5.56 (2H, m), 4.61 (1H, br-d,  $J = 11.5$  Hz), 4.81 (1H, d,  $J = 8.3$  Hz), 5.15 (2H, br-s), 7.30–7.27 (5H, m);  $^{13}\text{C}$  NMR (100 MHz,  $\text{CDCl}_3$ )  $\delta$  22.6, 23.4, 28.6, 29.6, 46.7, 46.9, 55.1, 55.6, 67.1, 67.3, 76.1, 77.1, 127.9, 128.1, 128.2, 128.5, 128.6, 136.1, 136.4, 154.3, 154.8; HRFABMS calcd for  $\text{C}_{13}\text{H}_{17}\text{N}_2\text{O}_4$  ( $\text{M}^+\text{+H}$ ) 265.1188, found: 265.1182.

**5-Nitromethyl-1-phenylpyrrolidin-2-one (2i).** 47% yield. Colourless crystals, mp 71.5–72 °C (hexane-EtOAc). IR ( $\text{CHCl}_3$ )  $\nu$  1703, 1557, 1498, 1383, 1231  $\text{cm}^{-1}$ ;  $^1\text{H}$  NMR (600 MHz,  $\text{CDCl}_3$ )  $\delta$  2.06–2.15 (1H, m), 2.48–2.56 (1H, m), 2.61 (1H, ddd,  $J = 17.2, 9.6, 5.0$  Hz), 2.69 (1H, ddd,  $J = 17.2, 9.6, 8.2$  Hz), 4.37 (1H, dd,  $J = 8.7, 7.6$  Hz), 4.53 (1H, dd,  $J = 8.7, 4.1$  Hz), 4.83–4.86 (1H, m), 7.25–7.30 (1H, m), 7.38–7.45 (4H, m);  $^{13}\text{C}$  NMR (100 MHz,  $\text{CDCl}_3$ )  $\delta$  22.0, 30.1, 57.2, 76.1, 124.0, 126.9, 129.5, 136.0, 173.5; HRFABMS calcd for  $\text{C}_{11}\text{H}_{13}\text{N}_2\text{O}_3$  ( $\text{M}^+\text{+H}$ ) 221.0926, found: 221.0923. Anal. Calcd for  $\text{C}_{11}\text{H}_{12}\text{N}_2\text{O}_3$ : C, 59.99; H, 5.49; N, 12.72. Found: C, 59.55; H, 5.74; N, 12.78.

**1-(4-Methylphenylsulfonyl)-5-nitromethylpyrrolidin-2-one (2j).** 60% yield. Colourless crystals, mp 138.5–139 °C (hexane-EtOAc). IR ( $\text{CHCl}_3$ )  $\nu$  1748, 1557, 1366, 1171, 1125  $\text{cm}^{-1}$ ;  $^1\text{H}$  NMR (400 MHz,  $\text{CDCl}_3$ )  $\delta$  2.05–2.13 (1H, m), 2.35–2.45 (2H, m),

2.46 (3H, s), 2.56–2.63 (1H, m), 4.71 (1H, dd,  $J = 13.2, 8.0$  Hz), 4.87–4.93 (1H, m), 4.99 (1H, dd,  $J = 13.2, 3.4$  Hz), 7.37 (2H, d,  $J = 8.1$ ), 7.95 (2H, d,  $J = 8.1$  Hz);  $^{13}\text{C}$  NMR (100 MHz,  $\text{CDCl}_3$ )  $\delta$  21.7, 22.5, 29.7, 55.9, 76.6, 128.4, 129.8, 134.7, 145.9, 172.6. Anal. Calcd for  $\text{C}_{12}\text{H}_{14}\text{N}_2\text{O}_5\text{S}$ : C, 48.31; H, 4.73; N, 9.39. Found: C, 48.22; H, 4.72; N, 9.24.

**1-(4-Methylphenylsulfonyl)-2-nitromethylpiperidine (2k).** 55% yield. Colourless oil. IR ( $\text{CHCl}_3$ )  $\nu$  1560, 1354, 1229, 1159  $\text{cm}^{-1}$ ;  $^1\text{H}$  NMR (400 MHz,  $\text{CDCl}_3$ )  $\delta$  1.33–1.52 (2H, m), 1.59–1.68 (4H, m), 2.43 (3H, s), 2.95 (1H, dd,  $J = 14.6, 12.7, 2.9$  Hz), 3.82 (1H, br-d,  $J = 12.7$  Hz), 4.53 (1H, dd,  $J = 11.7, 8.0$  Hz), 4.60 (1H, dd,  $J = 11.7, 7.1$  Hz), 4.79–4.85 (1H, m), 7.31 (2H, d,  $J = 8.0$  Hz), 7.70 (2H, d,  $J = 8.0$  Hz);  $^{13}\text{C}$  NMR (100 MHz,  $\text{CDCl}_3$ )  $\delta$  18.4, 21.5, 24.0, 25.7, 41.2, 50.5, 74.3, 127.0, 129.8, 137.2, 143.7; HRFABMS calcd for  $\text{C}_{13}\text{H}_{19}\text{N}_2\text{O}_4\text{S}$  ( $\text{M}^+\text{+H}$ ) 299.1066, found: 299.1062.

**2-Nitromethyltetrahydrofuran (2l).** 53% yield. Colourless oil. IR ( $\text{CHCl}_3$ )  $\nu$  1557, 1389, 1082  $\text{cm}^{-1}$ ;  $^1\text{H}$  NMR (400 MHz,  $\text{CDCl}_3$ )  $\delta$  1.63–1.72 (1H, m), 1.97 (2H, dt,  $J = 14.6, 6.8$  Hz), 2.11–2.20 (1H, m), 3.84 (1H, dt,  $J = 8.3, 6.8$  Hz), 3.91 (1H, dt,  $J = 8.5, 6.8$  Hz), 4.41 (1H, dd,  $J = 12.2, 5.1$  Hz), 4.45 (1H, dd,  $J = 12.2, 7.1$  Hz), 4.53–4.61 (1H, m);  $^{13}\text{C}$  NMR (150 MHz,  $\text{CDCl}_3$ )  $\delta$  25.3, 28.9, 68.6, 75.1, 78.9; HRFABMS calcd for  $\text{C}_5\text{H}_{10}\text{NO}_3$  ( $\text{M}^+\text{+H}$ ) 132.0661, found: 132.0666.

**cis-1-(4-Methylphenylsulfonyl)-2-nitromethyloctahydro-1H-indole (2m).** 78% yield. (as a mixture of two isomers, 95:5). Colourless oil. IR ( $\text{CHCl}_3$ )  $\nu$  1553, 1348, 1229, 1163  $\text{cm}^{-1}$ ;  $^1\text{H}$  NMR (400 MHz,  $\text{CDCl}_3$ , for major isomer including the partial peaks of minor isomer)  $\delta$  1.09–1.31 (3H, m), 1.40–1.50 (2H, m), 1.55–1.61 (2H, m), 1.65–1.72 (1H, m), 1.90–2.00 (3H, m), 2.45 (3H, s), 3.62 (1H, dt,  $J = 11.0, 6.3$  Hz), 3.88 (1H, dt,  $J = 11.2, 5.6$  Hz, for minor isomer), 4.04–4.12 (1H, m), 4.30–4.41 (2H, m, for minor isomer), 4.48 (1H, dd,  $J = 12.7, 9.3$  Hz), 5.15 (1H, dd,  $J = 12.7, 4.4$  Hz), 7.37 (2H, d,  $J = 8.0$  Hz), 7.77 (2H, d,  $J = 8.0$  Hz);  $^{13}\text{C}$  NMR (100 MHz,  $\text{CDCl}_3$ )  $\delta$  19.8 (minor), 20.0, 21.45 (minor), 21.48, 23.4 (minor), 24.0, 25.3 (minor), 25.4, 27.5 (minor), 31.1, 31.2 (minor), 32.6, 34.4 (minor), 36.1, 55.3 (minor), 57.1, 60.9, 61.0 (minor), 78.3 (minor), 80.6, 127.37 (minor), 127.42, 129.7 (minor), 129.9, 134.0, 143.6 (minor), 144.0; HRFABMS calcd for  $\text{C}_{16}\text{H}_{23}\text{N}_2\text{O}_4\text{S}$  ( $\text{M}^+\text{+H}$ ) 339.1379, found: 339.1383.

**trans-1-(4-Methylphenylsulfonyl)-2-nitromethyloctahydro-1H-indole (2n).** 72% yield. Colourless oil. IR ( $\text{CHCl}_3$ )  $\nu$  1553, 1348, 1225, 1162  $\text{cm}^{-1}$ ;  $^1\text{H}$  NMR (400 MHz,

$\text{CDCl}_3$ )  $\delta$  0.91–1.02 (1H, m), 1.16–1.28 (3H, m), 1.35–1.44 (1H, m), 1.57–1.63 (1H, m), 1.70–1.78 (2H, m), 1.80–1.87 (2H, m), 2.30 (1H, td,  $J = 10.7, 3.4$  Hz), 2.47 (3H, s), 2.50–2.56 (1H, m), 4.19 (1H, td,  $J = 10.2, 3.9$  Hz), 4.41 (1H, dd,  $J = 12.7, 10.8$  Hz), 4.91 (1H, dd,  $J = 12.7, 3.7$  Hz), 7.38 (2H, d,  $J = 8.3$  Hz), 7.72 (2H, d,  $J = 8.3$  Hz);  $^{13}\text{C}$  NMR (100 MHz,  $\text{CDCl}_3$ )  $\delta$  21.6, 24.4, 25.0, 29.3, 32.3, 33.0, 42.7, 57.3, 66.7, 78.8, 127.9, 129.9, 132.3, 144.2; HRFABMS calcd for  $\text{C}_{16}\text{H}_{23}\text{N}_2\text{O}_4\text{S}$  ( $\text{M}^+\text{+H}$ ) 339.13786, found: 339.13825.

**1-Acetyl-2-nitromethylindoline (2p).** 69% yield. Colourless crystals, mp 70–70.5 °C (hexane-EtOAc). IR ( $\text{CHCl}_3$ )  $\nu$  1659, 1557, 1485, 1393, 1323  $\text{cm}^{-1}$ ; Rotamers were observed in NMR spectra of **2p**.  $^1\text{H}$  NMR (400 MHz,  $\text{CDCl}_3$ )  $\delta$  2.35 and 2.44 (total 3H, br and s), 2.95 (1H, d,  $J = 17.0$  Hz), 3.45 (1H, br-dd,  $J = 16.0, 9.6$  Hz), 4.40 (1H, dd,  $J = 11.9, 9.2$  Hz), 4.55 and 4.79 (total 1H, br and br-d,  $J = 9.6$  Hz), 5.05 and 5.38 (total 1H, both br), 7.06–7.27 and 8.07 (total 4H, m and br);  $^{13}\text{C}$  NMR (150 MHz,  $\text{CDCl}_3$ )  $\delta$  24.2, 31.2, 56.7, 75.4, 114.7, 124.2, 126.2, 127.9, 130.7, 140.4, 168.6; HRFABMS calcd for  $\text{C}_{11}\text{H}_{13}\text{N}_2\text{O}_3$  ( $\text{M}^+\text{+H}$ ) 221.0926, found: 221.0931.

**2-Nitromethyl-1-trifluoroacetyl-indoline (2q).** 56% yield. Colourless oil. IR ( $\text{CHCl}_3$ )  $\nu$  1701, 1560, 1483, 1431, 1379, 1263, 1149  $\text{cm}^{-1}$ ; Rotamers were observed in NMR spectra of **2q**.  $^1\text{H}$  NMR (400 MHz,  $\text{CDCl}_3$ )  $\delta$  3.06 (1H, d,  $J = 16.3$  Hz), 3.57 (1H, dd,  $J = 16.3, 7.6$  Hz), 4.42 (1H, dd,  $J = 12.7, 10.5$  Hz), 4.62 (1H, d,  $J = 12.7$  Hz), 5.34 (1H, br), 7.22–7.35 and 8.04 (total 4H, m and br-d,  $J = 7.1$  Hz);  $^{13}\text{C}$  NMR (150 MHz,  $\text{CDCl}_3$ )  $\delta$  33.7, 57.1, 76.3, 115.9 (q,  $J_{\text{C-F}} = 286$  Hz), 119.0, 125.7, 127.0, 128.5, 128.9, 154.0 (q,  $J_{\text{C-F}} = 77.6$  Hz) HRFABMS calcd for  $\text{C}_{11}\text{H}_{10}\text{F}_3\text{N}_2\text{O}_3$  ( $\text{M}^+\text{+H}$ ) 275.0644, found: 275.0645.

**1-(Benzyloxycarbonyl)-2-nitromethylindoline (2r).** 42% yield. Colourless crystals, mp 106.5–107 °C (hexane-EtOAc). IR ( $\text{CHCl}_3$ )  $\nu$  1712, 1556, 1485, 1406, 1327, 1281, 1140  $\text{cm}^{-1}$ ;  $^1\text{H}$  NMR (400 MHz,  $\text{CDCl}_3$ )  $\delta$  2.99 (1H, d,  $J = 16.5$  Hz), 3.49 (1H, dd,  $J = 17.2, 9.6$  Hz), 4.40 (1H, br), 4.70–4.81 (1H, br), 5.14 (1H, br), 5.31 (2H, br), 7.02 (1H, br), 7.18 (1H, d,  $J = 7.6$  Hz), 7.21 (2/3 H, br), 7.35–7.44 (6H, m), 7.84 (1/3H, br);  $^{13}\text{C}$  NMR (150 MHz,  $\text{CDCl}_3$ )  $\delta$  31.9 (br), 32.6 (br), 56.7, 67.8 (br), 75.9 (br), 115.6, 123.8, 125.2, 128.1, 128.4, 128.6, 128.7, 135.5, 141.0 (br), 151.9 (br); HRFABMS calcd for  $\text{C}_{17}\text{H}_{17}\text{N}_2\text{O}_4$  ( $\text{M}^+\text{+H}$ ) 313.1188, found: 313.1191.

**2-Nitromethyl-1-phenylpyrrolidine (3).** To a solution of **2i** (5.0 mg, 23  $\mu\text{mol}$ ) in THF

(1 mL) was added a 1M solution of  $\text{BH}_3 \cdot \text{THF}$  (0.7 mL, 0.70 mmol) at room temperature, and the mixture was heated at reflux for 2 h. To the reaction mixture was added MeOH, and the mixture was further stirred at room temperature for 30 min. 1N HCl was added and heated reflux for 1 h. The reaction mixture was basified by addition of a saturate solution of  $\text{NaHCO}_3$ , and the mixture was extracted with EtOAc. The organic phase was washed with brine and dried with  $\text{MgSO}_4$ . The mixture was concentrated and the resultant residue was purified with silica gel chromatography (hexane/EtOAc, 5:1) to give **3** (4.1 mg, 88%) as a colourless oil. IR ( $\text{CHCl}_3$ )  $\nu$  1600, 1549, 1485, 1342  $\text{cm}^{-1}$ ;  $^1\text{H}$  NMR (600 MHz,  $\text{CDCl}_3$ )  $\delta$  2.05 (4H, m), 3.19–3.24 (1H, m), 3.49 (1H, t,  $J = 8.3$ ), 4.19 (1H, dd,  $J = 11.0, 9.6$  Hz), 4.40–4.44 (1H, m), 4.63 (1H, dd,  $J = 11.0, 2.7$  Hz), 6.70 (2H, d,  $J = 7.6$  Hz), 6.78 (1H, t,  $J = 7.6$  Hz), 7.29 (2H, t,  $J = 8.2$  Hz);  $^{13}\text{C}$  NMR (150 MHz,  $\text{CDCl}_3$ )  $\delta$  22.8, 29.3, 48.1, 57.4, 75.8, 111.9, 117.3, 129.7, 145.7; HRFABMS calcd for  $\text{C}_{11}\text{H}_{14}\text{N}_2\text{O}_2$  ( $\text{M}^+ + \text{H}$ ) 206.1055, found: 206.1056.

## References

- (1) R. C. Larock, H. Yang, S. M. Weinreb and R. Herr, *J. Org. Chem.*, 1994, **59**, 4172.
- (2) T. Wu, G. Yin and G. Liu, *J. Am. Chem. Soc.*, 2009, **131**, 16354.
- (3) C. F. Rosewall, P. A. Sibbald, D. V. Liskin and F. E. Michael, *J. Am. Chem. Soc.*, 2009, **131**, 9488.
- (4) I. Tellitu, A. Urrejola, S. Serna, I. Moreno, M. Teresa Herrero, E. Domínguez, R. SanMartín and A. Correa, *Eur. J. Org. Chem.*, 2007, 437.
- (5) M. R. Manzoni, T. P. Zabawa, D. Kasi and S. R. Chemler, *Organometallics*, 2004, **23**, 5619.
- (6) P. H. Fuller, J.-W. Kim and S. R. Chemler, *J. Am. Chem. Soc.*, 2008, **130**, 17638.
- (7) C. F. Bender and R. A. Widenhoefer, *Chem. Commun.*, 2006, 4143.
- (8) O. Benali, M. A. Miranda and R. Tormos, *Eur. J. Org. Chem.* 2002, 2317.



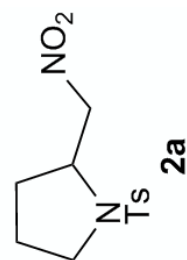

2a-1H.nls  
091128  
Sat Nov 28 16:22:37 2009  
1H  
non  
399.65 MHz  
0.00 KHz  
134300.00 Hz  
32768  
7993.60 Hz  
4.0993 sec  
2.9007 sec  
6.80 usec  
1H  
20.5 c  
CDCl3  
0.00 ppm  
0.12 Hz  
18  
RGAIN

DFILE  
COMINT  
DATIM  
OBNUC  
EXMOD  
OBFRQ  
OBSET  
OBFIN  
POINT  
FREQU  
SCANS  
ACQTM  
PD  
PW1  
IRNUC  
CTEMP  
SLVNT  
EXREF  
BF  
RGAIN

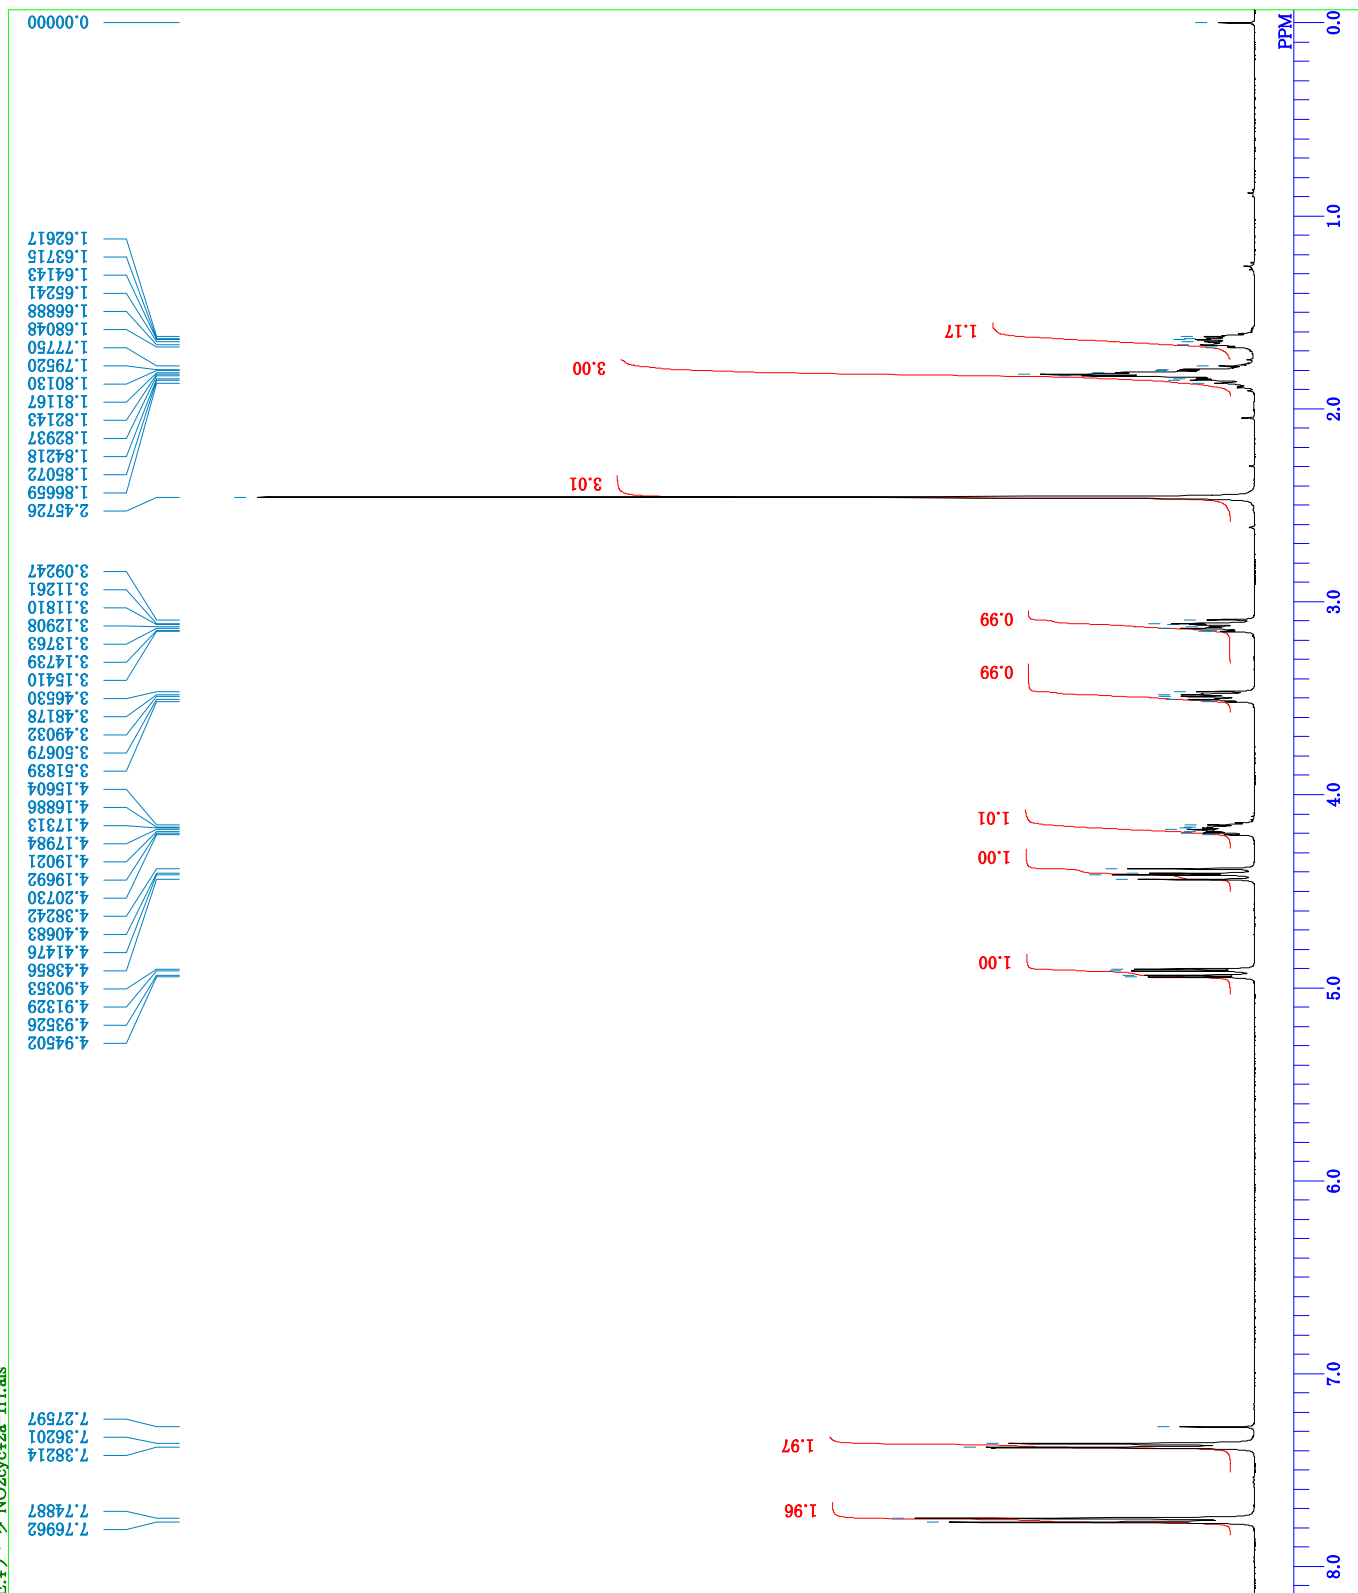

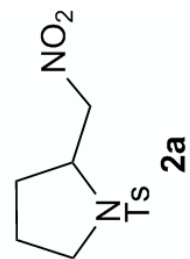

2a-C.als  
091128  
Sat Nov 28 16:37:36 2009  
13C  
bcm  
100.40 MHz  
0.00 KHz  
135500.00 Hz  
32768  
27100.27 Hz  
257  
1.2091 sec  
1.7909 sec  
4.90 usec  
1H  
21.7 c  
CDCL3  
77.00 ppm  
0.12 Hz  
26  
RGAIN

DFILE  
COMINT  
DATIM  
OBNUC  
EXMOD  
OBFRQ  
OBSET  
OBFIN  
POINT  
FREQU  
SCANS  
ACQTM  
PD  
PW1  
IRNUC  
CTEMP  
SLVNT  
EXREF  
BF  
RGAIN

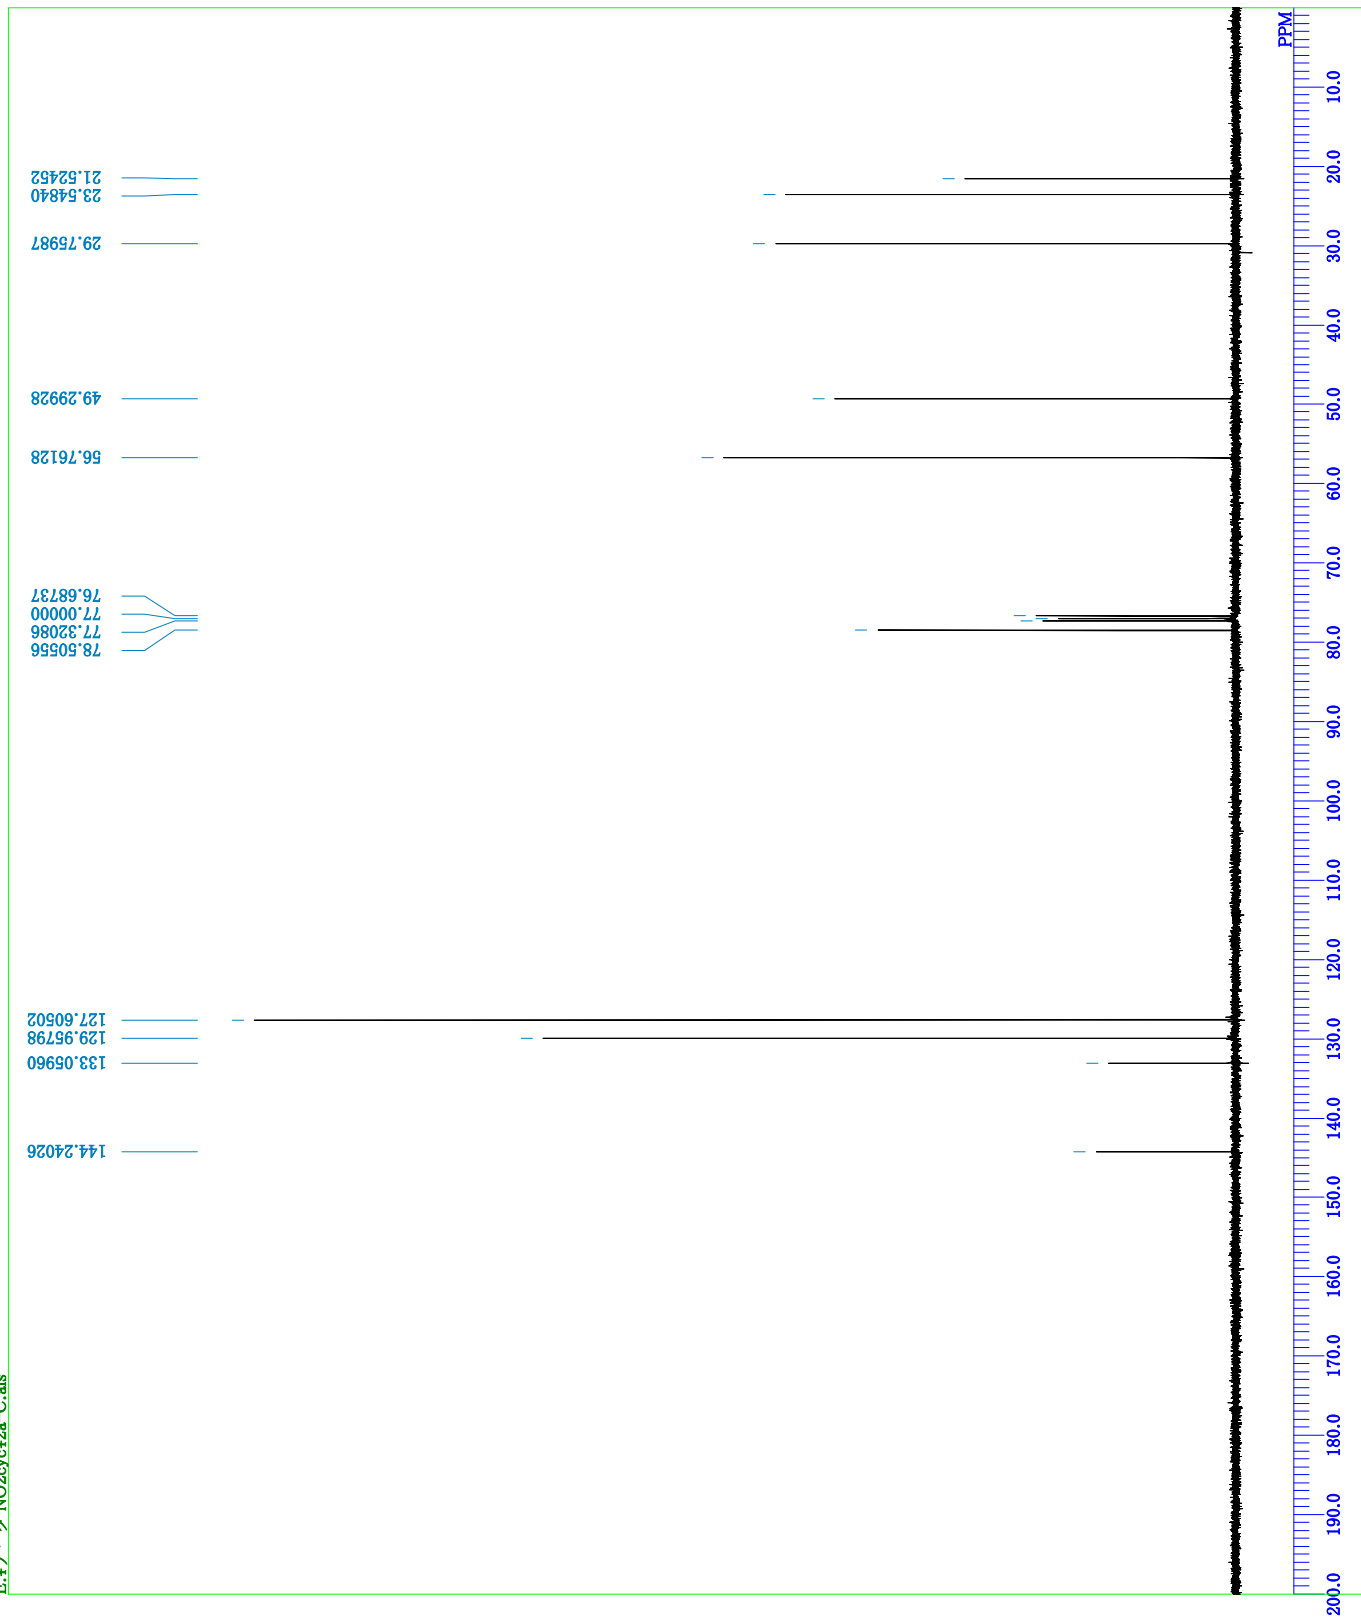

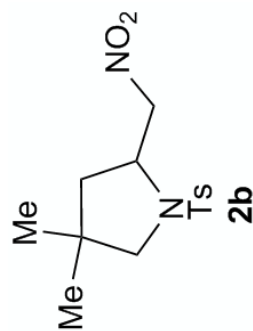

2b-1H.als  
 091130  
 Mon Nov 30 21:30:36 2009  
 1H  
 non  
 399.65 MHz  
 0.00 KHz  
 134300.00 Hz  
 32768  
 7993.60 Hz  
 16  
 4.0993 sec  
 2.9007 sec  
 6.80 usec  
 1H  
 21.7 c  
 CDCL3  
 0.00 ppm  
 0.12 Hz  
 23  
 23

DFILE  
 COMINT  
 DATIM  
 OBNUC  
 EXMOD  
 OBFREQ  
 OBSET  
 OBFIN  
 POINT  
 FREQU  
 SCANS  
 ACQTM  
 PD  
 PW1  
 IRNUC  
 CTEMP  
 SLVNT  
 EXREF  
 BF  
 RGAIN

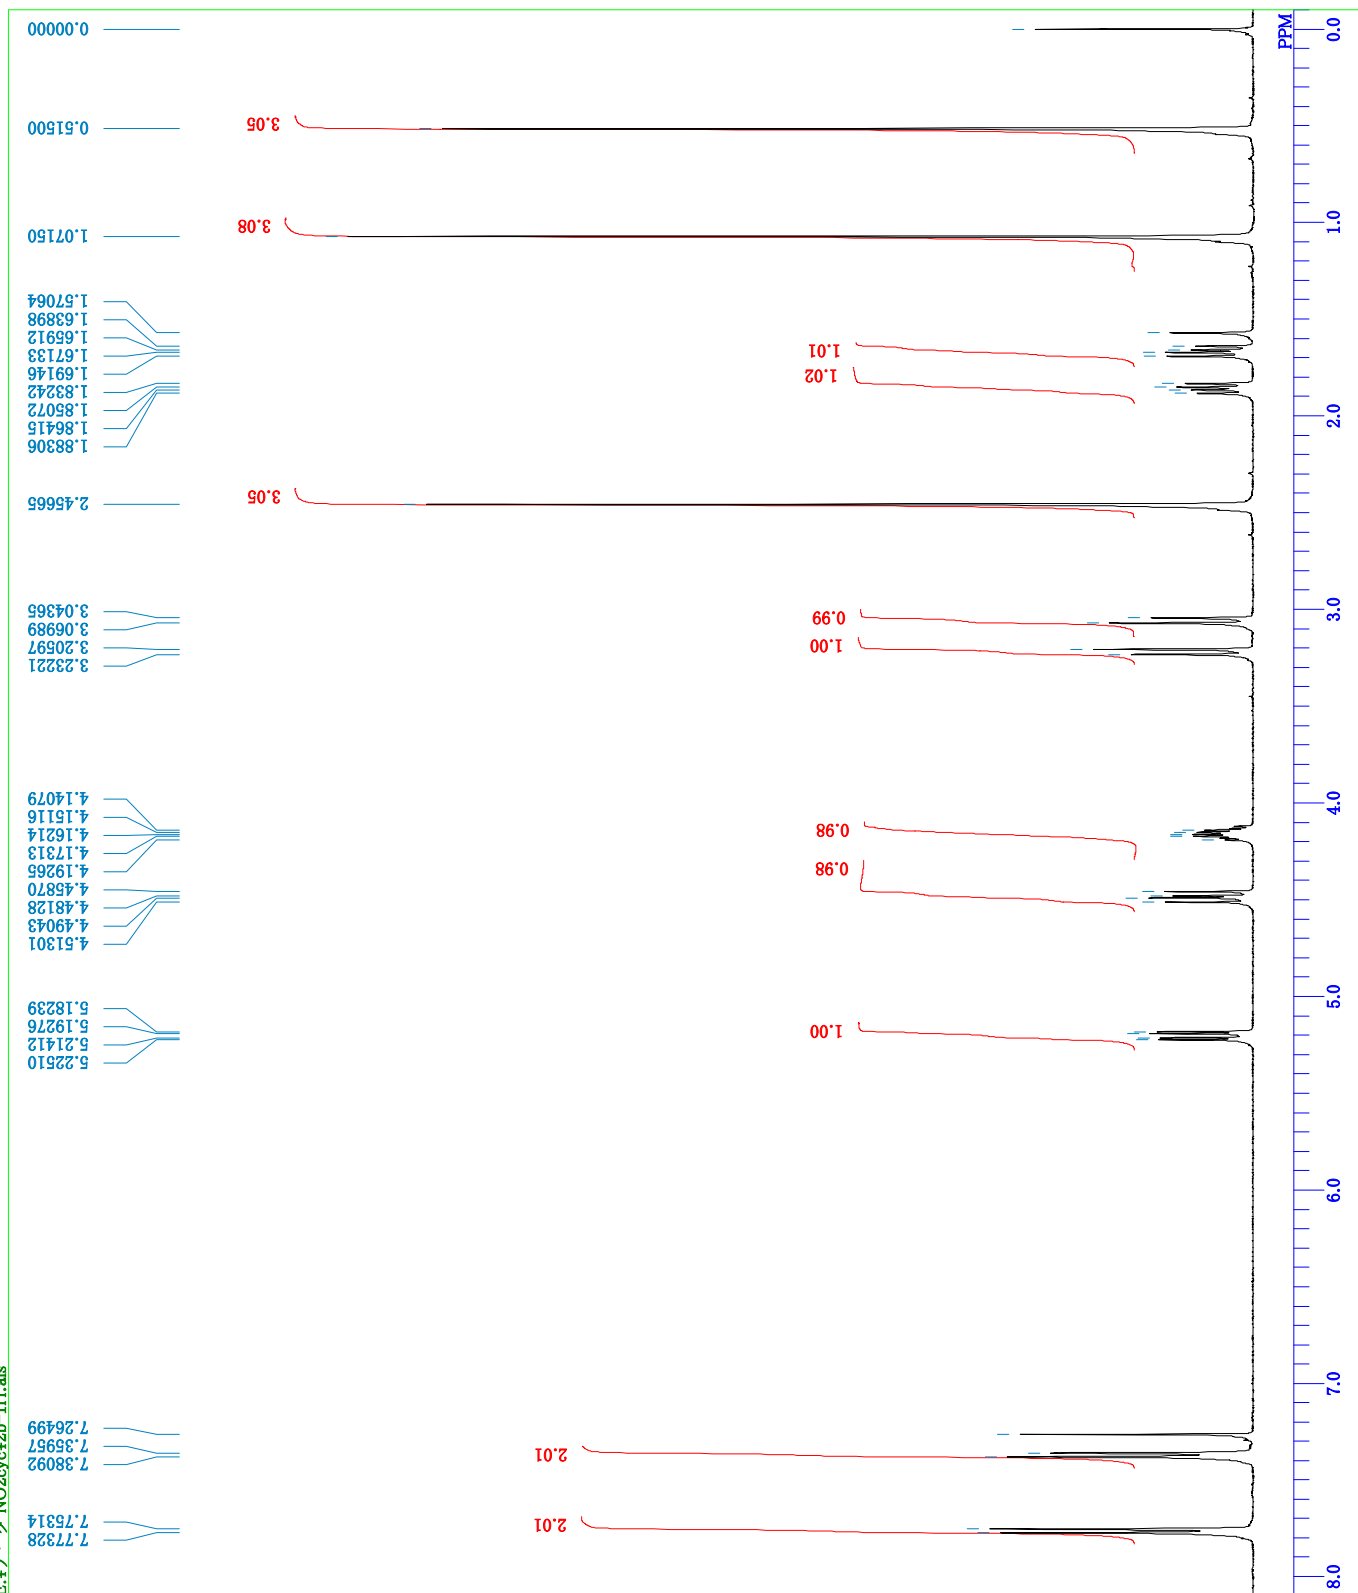

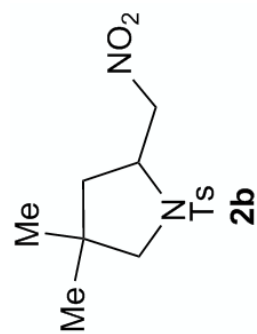

2b-C.als  
091130  
Mon Nov 30 21:56:59 2009  
13C  
bcm 100.40 MHz  
0.00 KHz  
135500.00 Hz  
32768  
27100.27 Hz  
512  
1.2091 sec  
1.7909 sec  
4.90 usec  
1H  
23.2 c  
CDCL3  
77.00 ppm  
0.12 Hz  
27  
RGAIN

DFILE  
COMINT  
DATIM  
OBNUC  
EXMOD  
OBFRQ  
OBSET  
OBFIN  
POINT  
FREQU  
SCANS  
ACQTM  
PD  
PW1  
IRNUC  
CTEMP  
SLVNT  
EXREF  
BF  
RGAIN

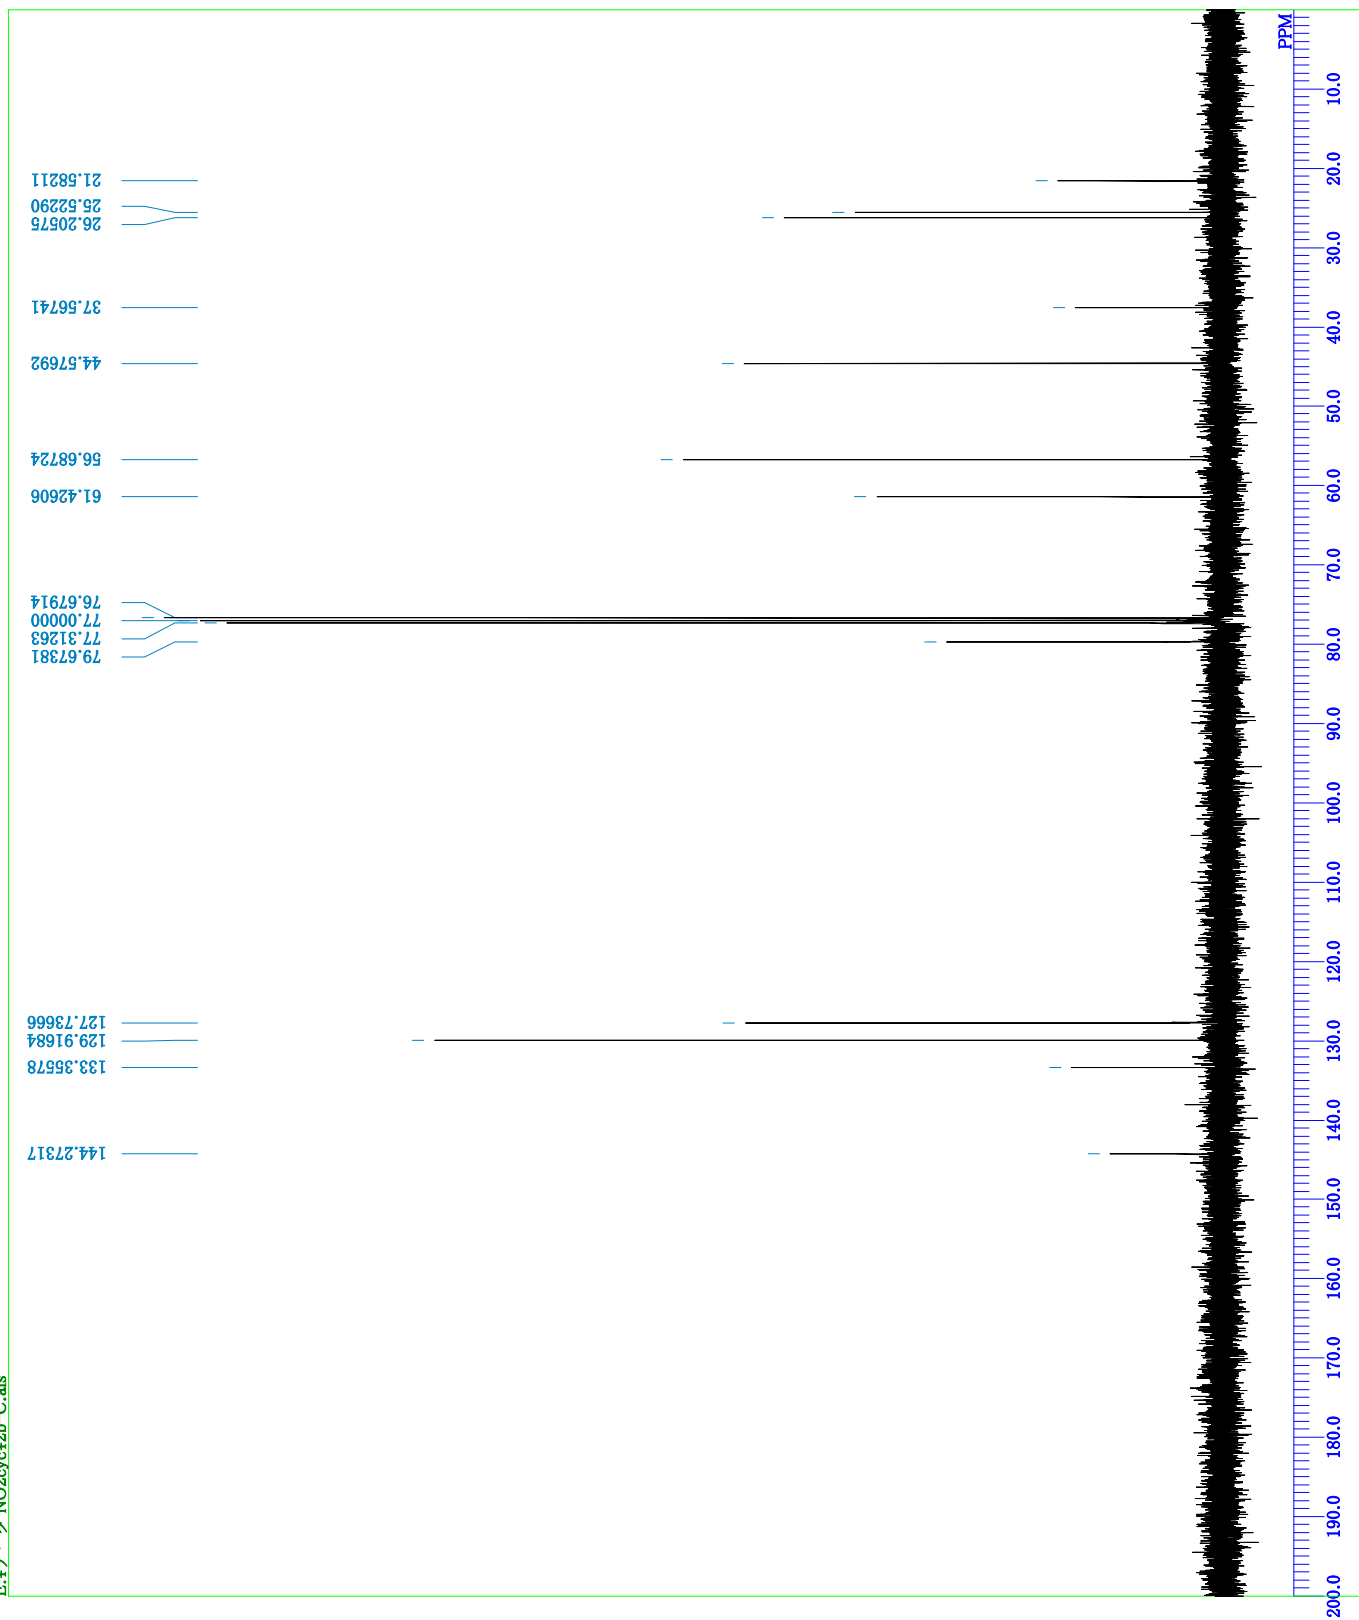

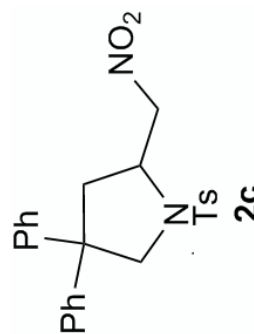

2c-1H.nls  
 091201  
 Tue Dec 01 21:44:10 2009  
 1H  
 non  
 399.65 MHz  
 0.00 KHz  
 134300.00 Hz  
 32768  
 7993.60 Hz  
 16  
 4.0993 sec  
 2.9010 sec  
 6.80 usec  
 1H  
 21.9 c  
 CDCl3  
 0.00 ppm  
 0.12 Hz  
 24  
 RGAIN

DFILE  
 COMINT  
 DATIM  
 OBNUC  
 EXMOD  
 OBFRQ  
 OBSET  
 OBFIN  
 POINT  
 FREQU  
 SCANS  
 ACQTM  
 PD  
 PW1  
 IRNUC  
 CTEMP  
 SLYNT  
 EXREF  
 BF  
 RGAIN

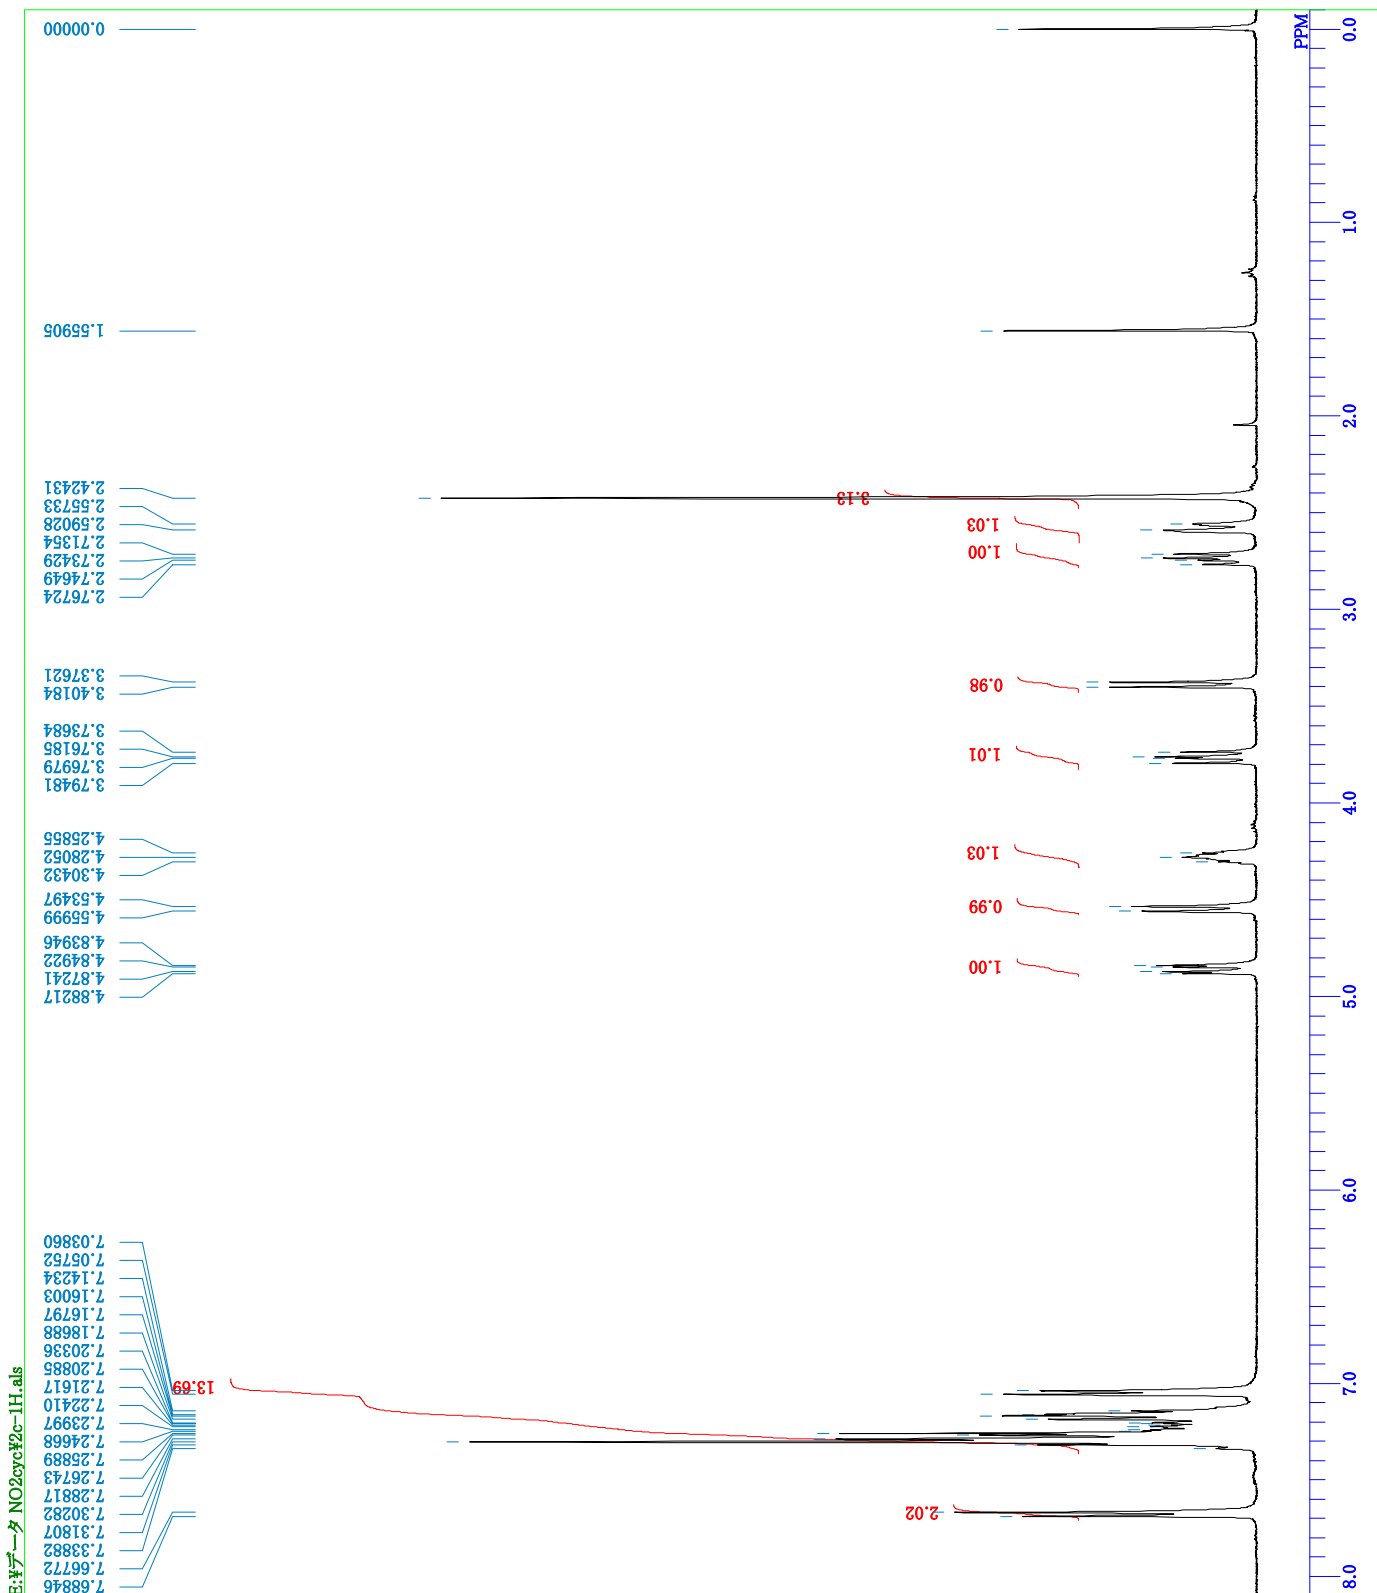

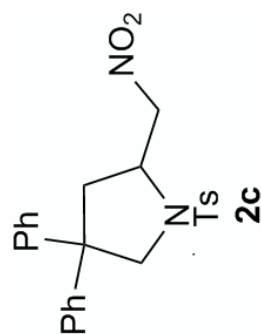

2c-C.als  
091201  
Tue Dec 01 21:57:56 2009  
13C  
bcm  
100.40 MHz  
0.00 KHz  
135600.00 Hz  
32768  
27100.27 Hz  
257  
1.2091 sec  
1.7909 sec  
4.90 usec  
1H  
23.4 c  
CDCl3  
77.00 ppm  
0.12 Hz  
19  
RGAIN

DFILE  
COMINT  
DATIM  
OBNUC  
EXMOD  
OBFREQ  
OBSSET  
OBSFID  
POINT  
FREQU  
SCANS  
ACQTM  
PD  
PW1  
IRNUC  
CTEMP  
SLVNT  
EXREF  
BF  
RGAIN

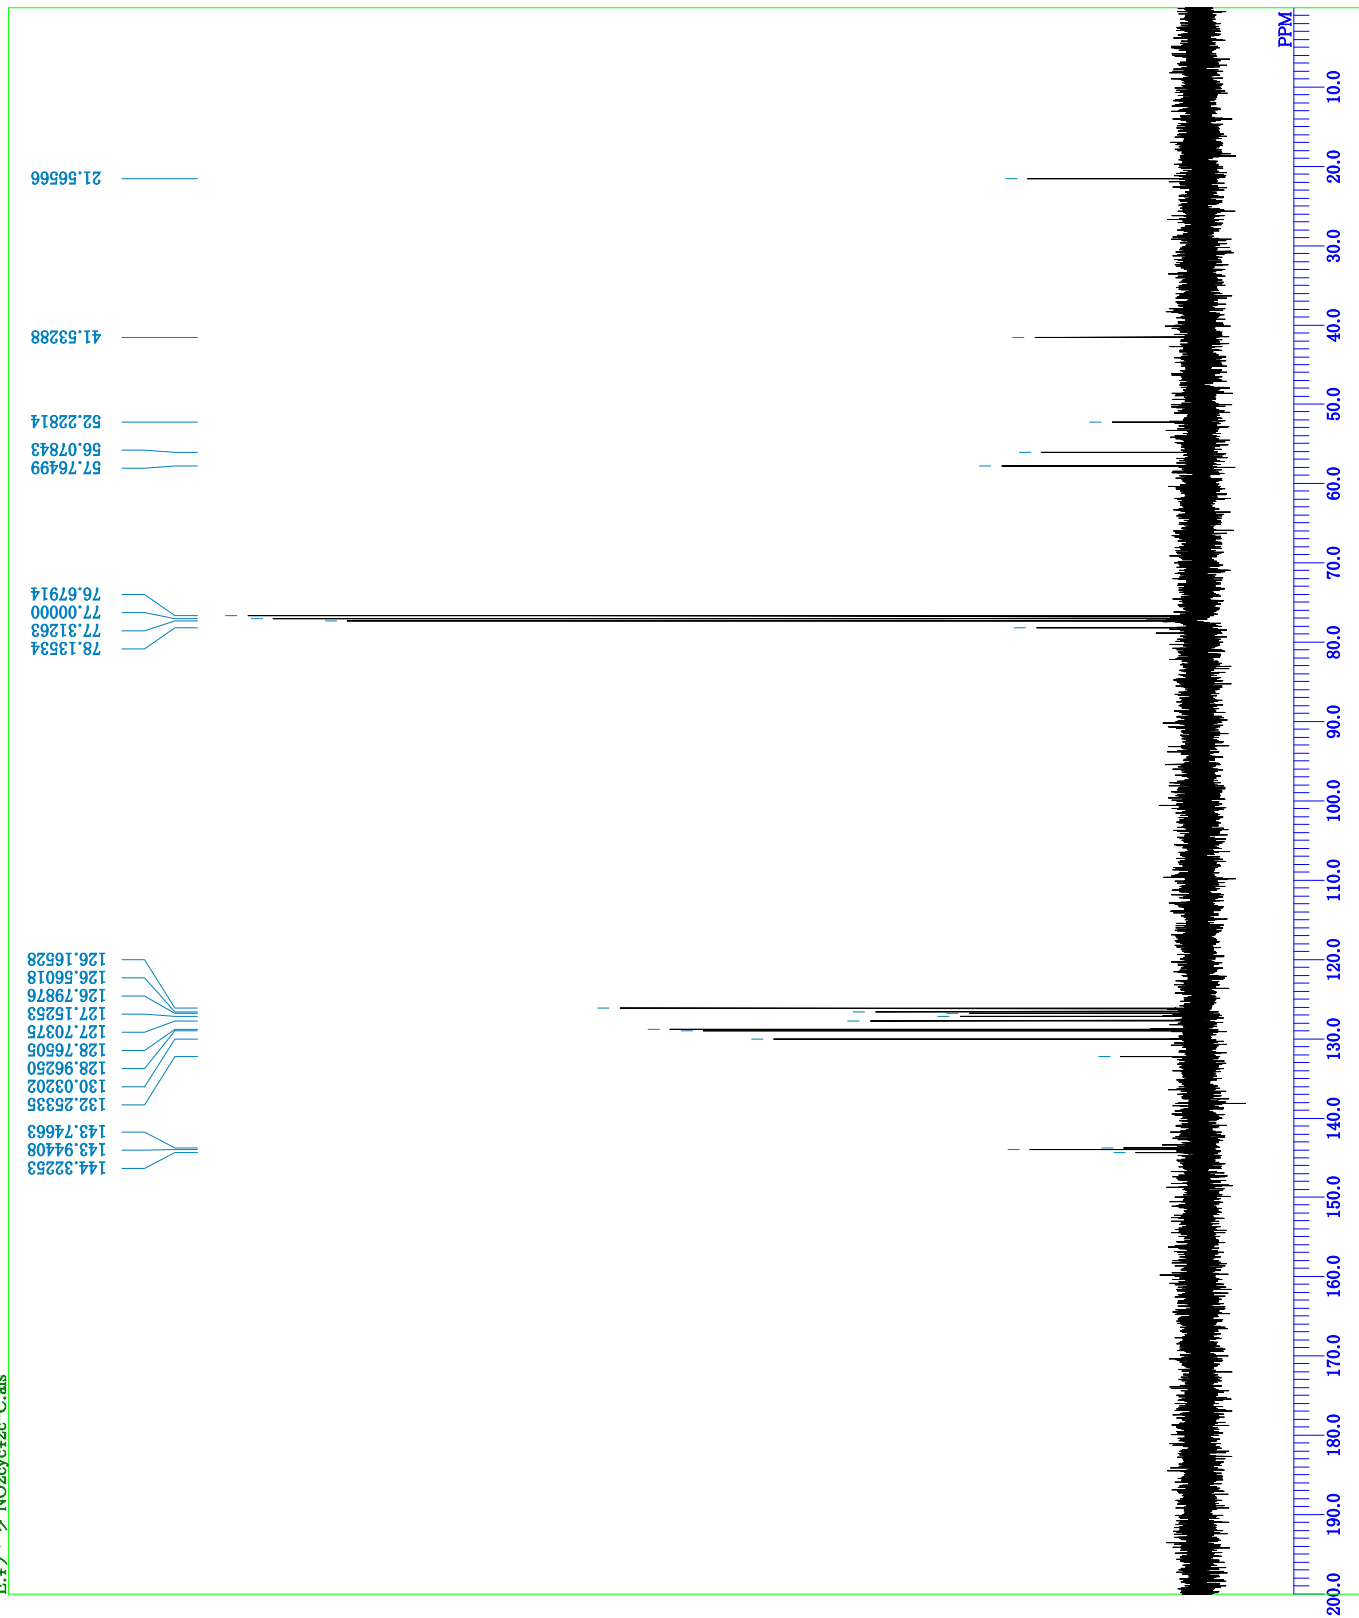

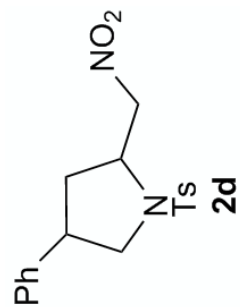

2d-1H.nls  
 091208  
 Tue Dec 08 22:34:49 2009  
 1H  
 non  
 399.65 MHz  
 0.00 KHz  
 134300.00 Hz  
 32768  
 7993.60 Hz  
 16  
 4.0993 sec  
 2.9007 sec  
 6.80 usec  
 1H  
 19.7 c  
 CDCL3  
 0.00 ppm  
 0.16 Hz  
 16  
 RGAIN

DFILE  
 COMINT  
 DATIM  
 OBNUC  
 EXMOD  
 OBFREQ  
 OBSSET  
 OBFIN  
 POINT  
 FREQU  
 SCANS  
 ACQTM  
 PD  
 PW1  
 IRNUC  
 CTEMP  
 SLVNT  
 EXREF  
 BF  
 RGAIN

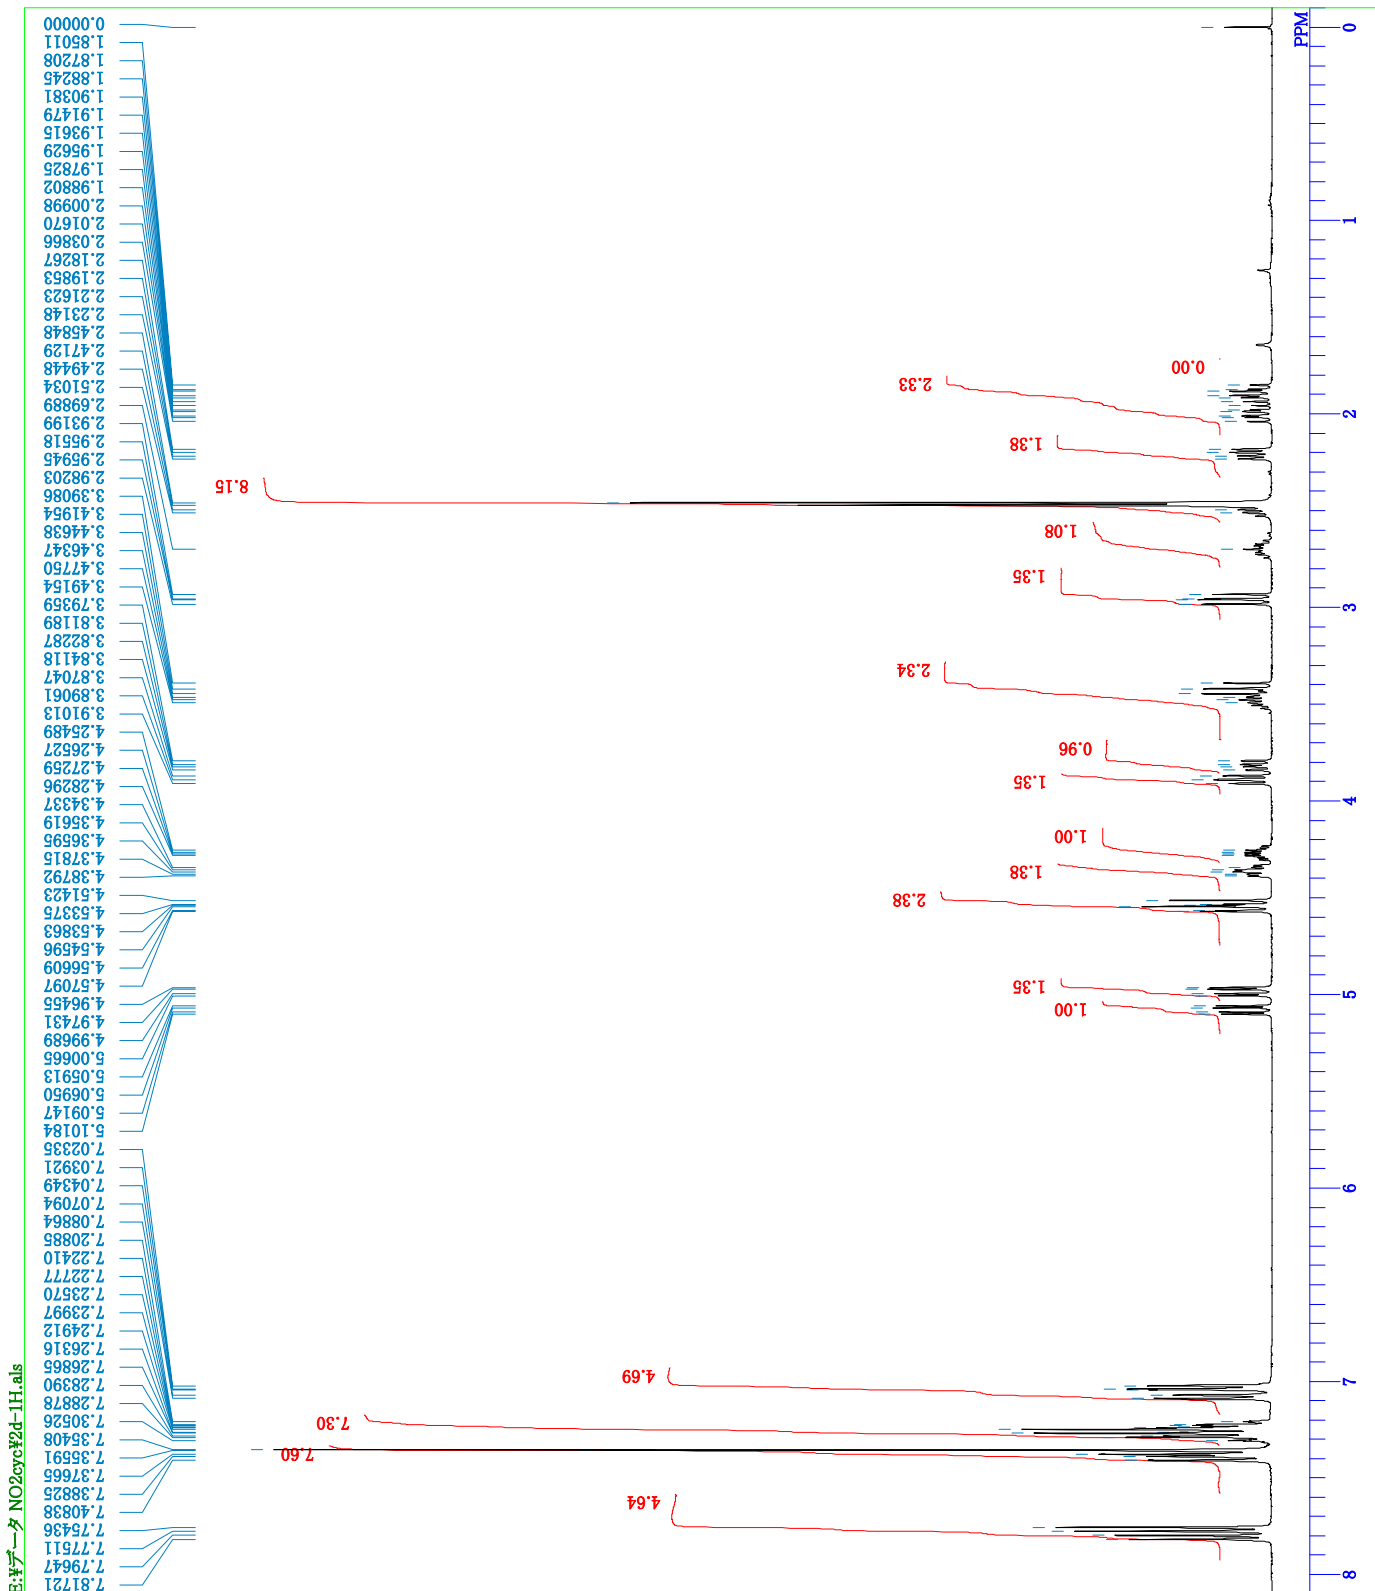

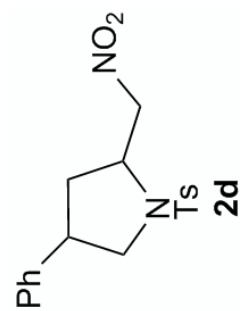

2d-C.ALS  
091208  
Tue Dec 08 22:48:15 2009  
13C  
bcm  
100.40 MHz  
0.00 KHz  
135500.00 Hz  
32768  
27100.27 Hz  
257  
1.2091 sec  
1.7909 sec  
4.90 usec  
1H  
21.2 c  
CDCL3  
77.00 ppm  
0.16 Hz  
26  
RGAIN

DFILE  
COMINT  
DATIM  
OBNUC  
EXMOD  
OBFRQ  
OBSET  
OBFIN  
POINT  
FREQU  
SCANS  
ACQTM  
PD  
PW1  
IRNUC  
CTEMP  
SLVNT  
EXREF  
BF  
RGAIN

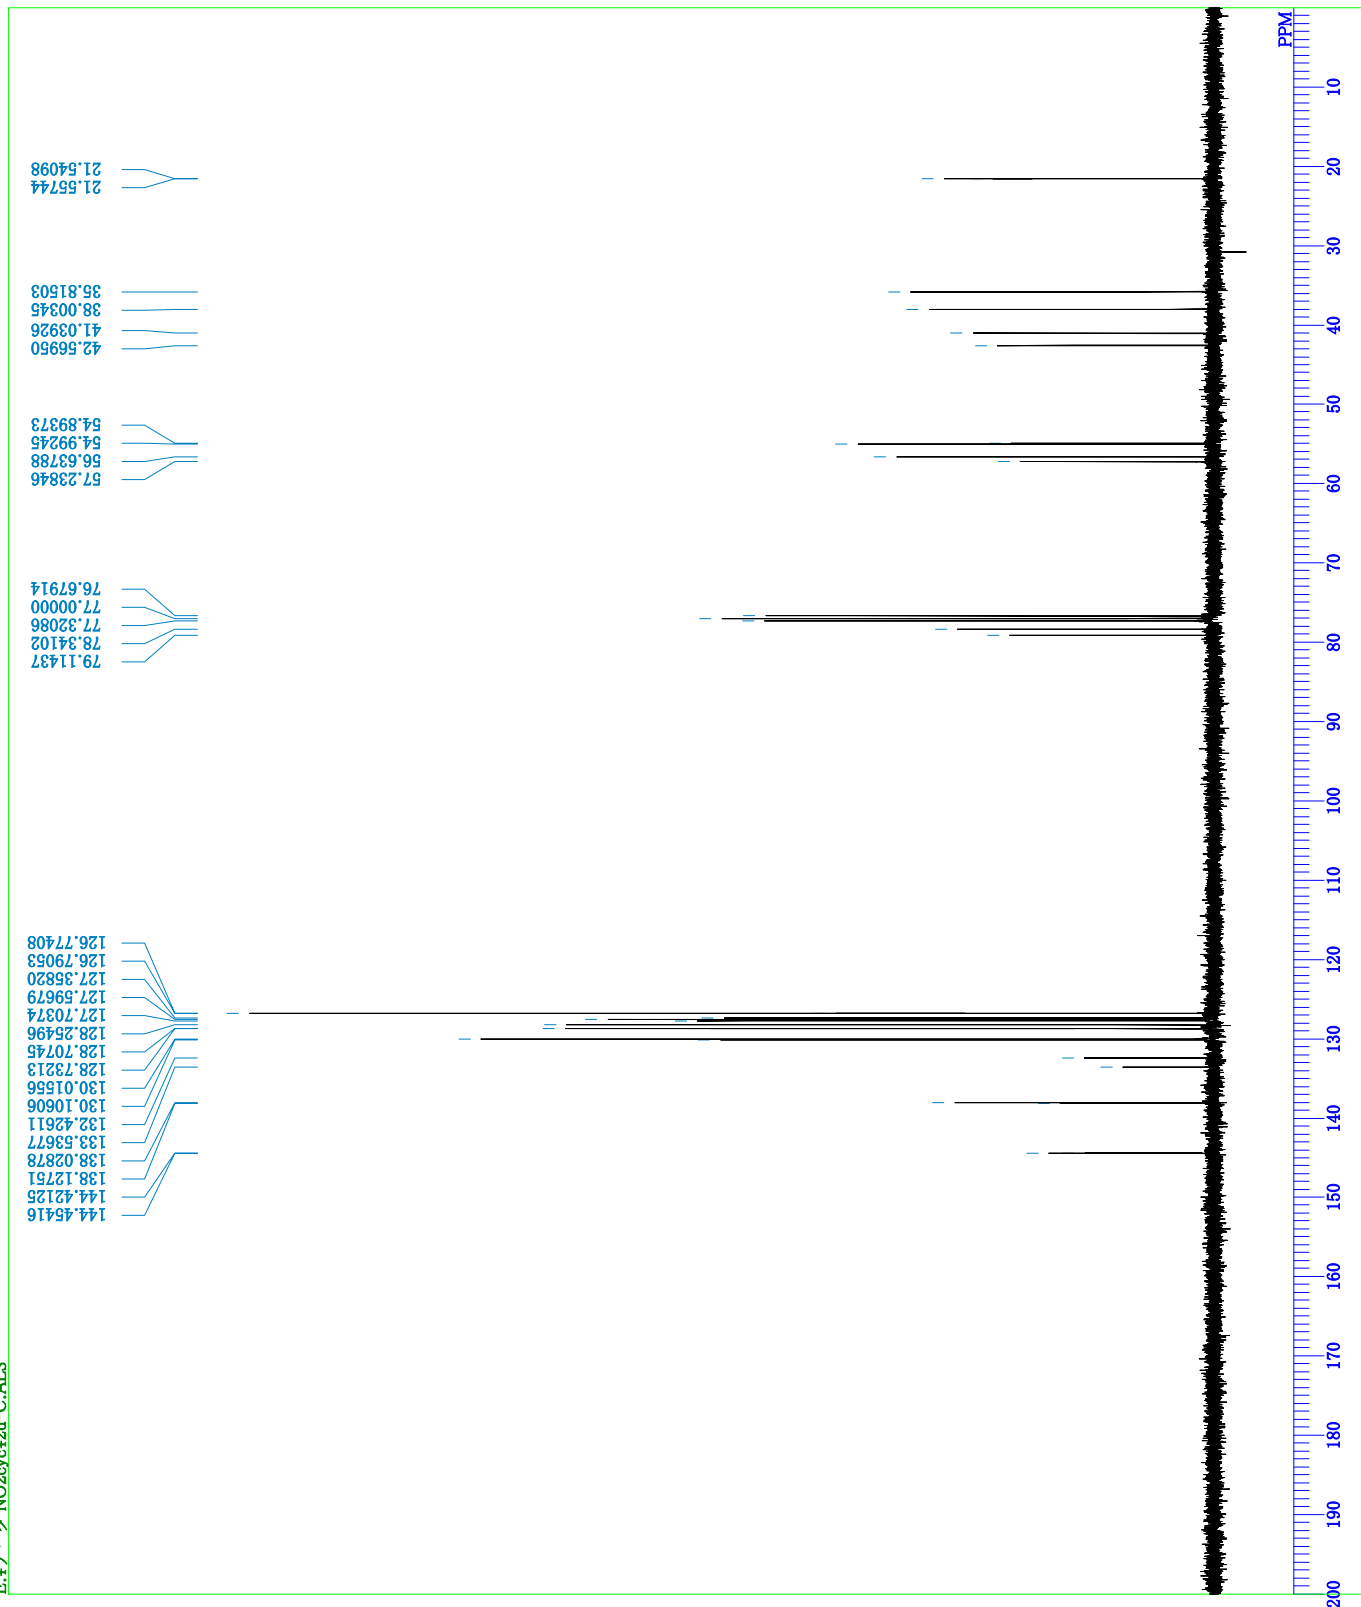



09123

E:\3\データ\NO2cyc\2e-1H.als

DFILE  
 COMINT  
 DATIM  
 OBNUC  
 EXMOD  
 OBFRQ  
 OBSET  
 OBSET  
 POINT  
 FREQU  
 SCANS  
 ACQTM  
 PD  
 PW1  
 IRNUC  
 CTEMP  
 SLYNT  
 EXREF  
 BF  
 RGAIN

2e-1H.als  
 09123  
 Wed Dec 02 13:19:07 2009  
 1H  
 non  
 399.65 MHz  
 0.00 KHz  
 134300.00 Hz  
 32768  
 7993.60 Hz  
 16  
 4.0993 sec  
 2.9007 sec  
 6.80 usec  
 1H  
 21.7 c  
 CDCL3  
 0.00 ppm  
 0.12 Hz  
 23

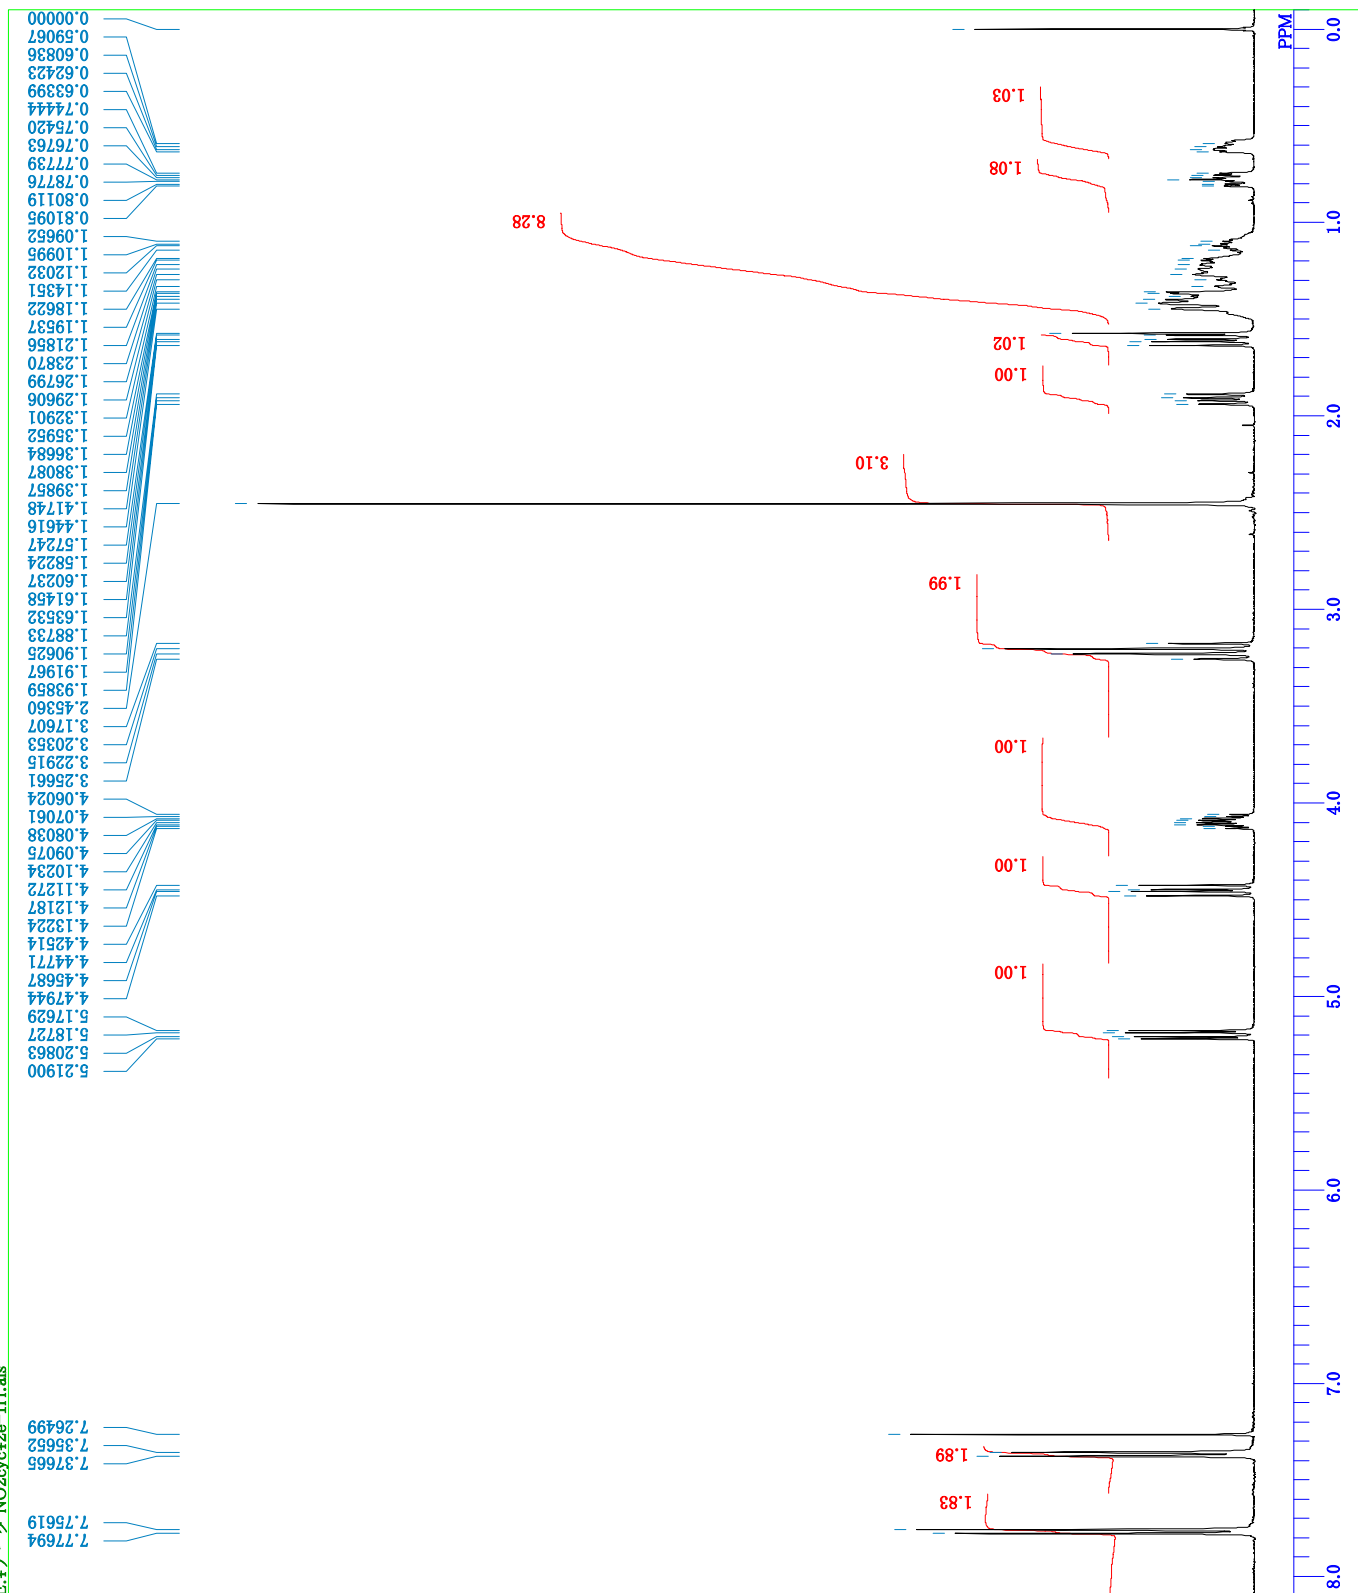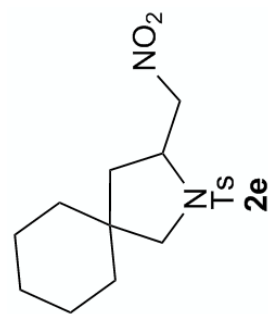

2e-C.als  
091203  
Thu Dec 03 10:50:01 2009  
13C  
bcm  
100.40 MHz  
0.00 KHz  
135500.00 Hz  
32768  
27100.27 Hz  
512  
1.2091 sec  
1.7909 sec  
4.90 usec  
1H  
23.4 c  
CDCL3  
77.00 ppm  
0.16 Hz  
24  
RGAIN

DFILE  
COMINT  
DATIM  
OBNUC  
EXMOD  
OBFRQ  
OBSET  
OBFIN  
POINT  
FREQU  
SCANS  
ACQTM  
PD  
PW1  
IRNUC  
CTEMP  
SLVNT  
EXREF  
BF  
RGAIN

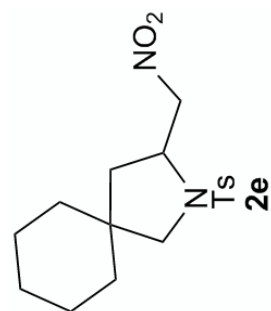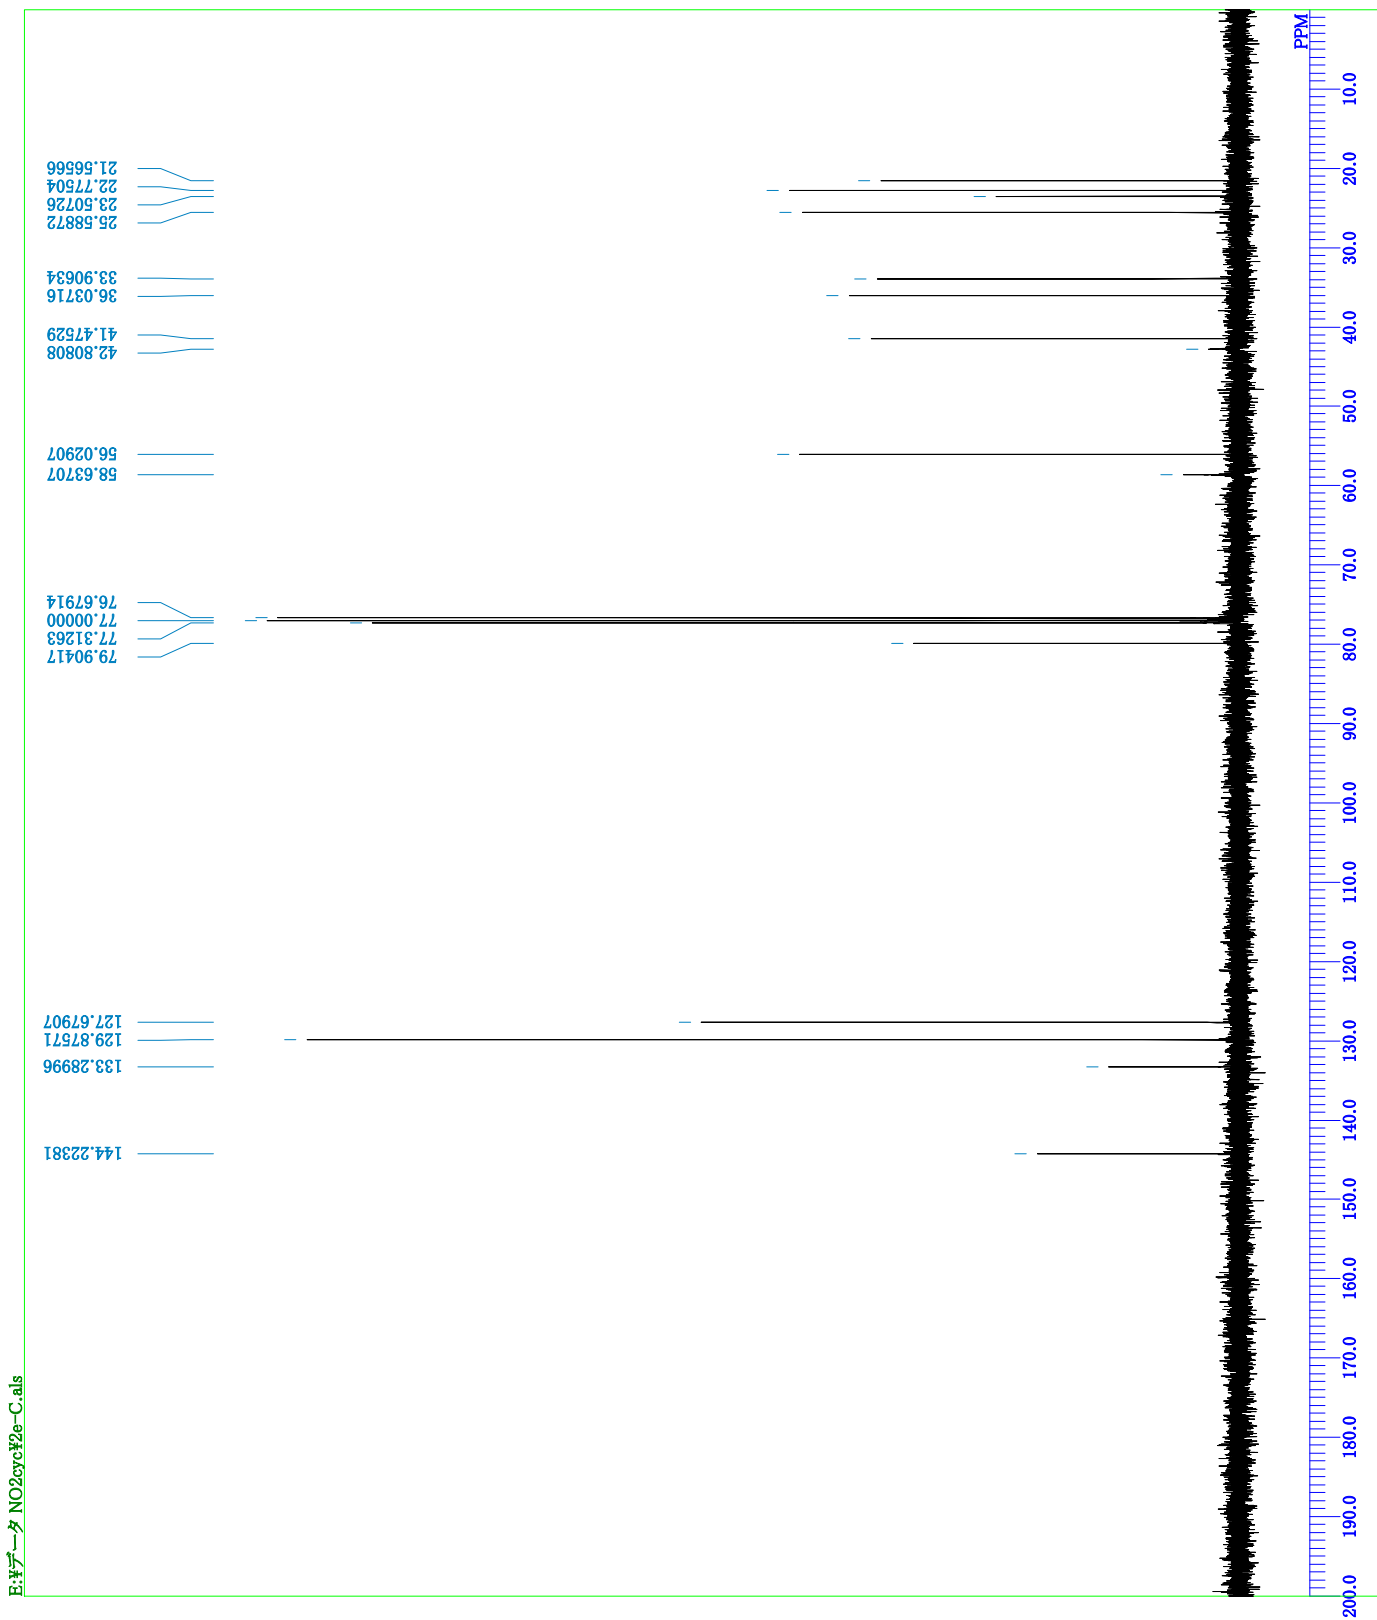

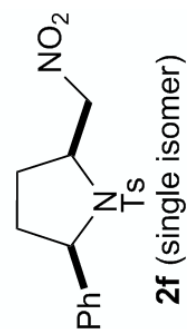

2f-1H.als  
091209  
Wed Dec 09 15:52:53 2009  
1H  
non  
399.65 MHz  
0.00 KHz  
134300.00 Hz  
32768  
7993.60 Hz  
4.0993 sec  
2.9010 sec  
6.80 usec  
1H  
21.6 c  
CDCL3  
0.00 ppm  
0.16 Hz  
15  
RGAIN

DFILE  
COMINT  
DATIM  
OBNUC  
EXMOD  
OBFRQ  
OBSET  
POINT  
FREQU  
SCANS  
ACQTM  
PD  
PW1  
IRNUC  
CTEMP  
SLVNT  
EXREF  
BF  
RGAIN

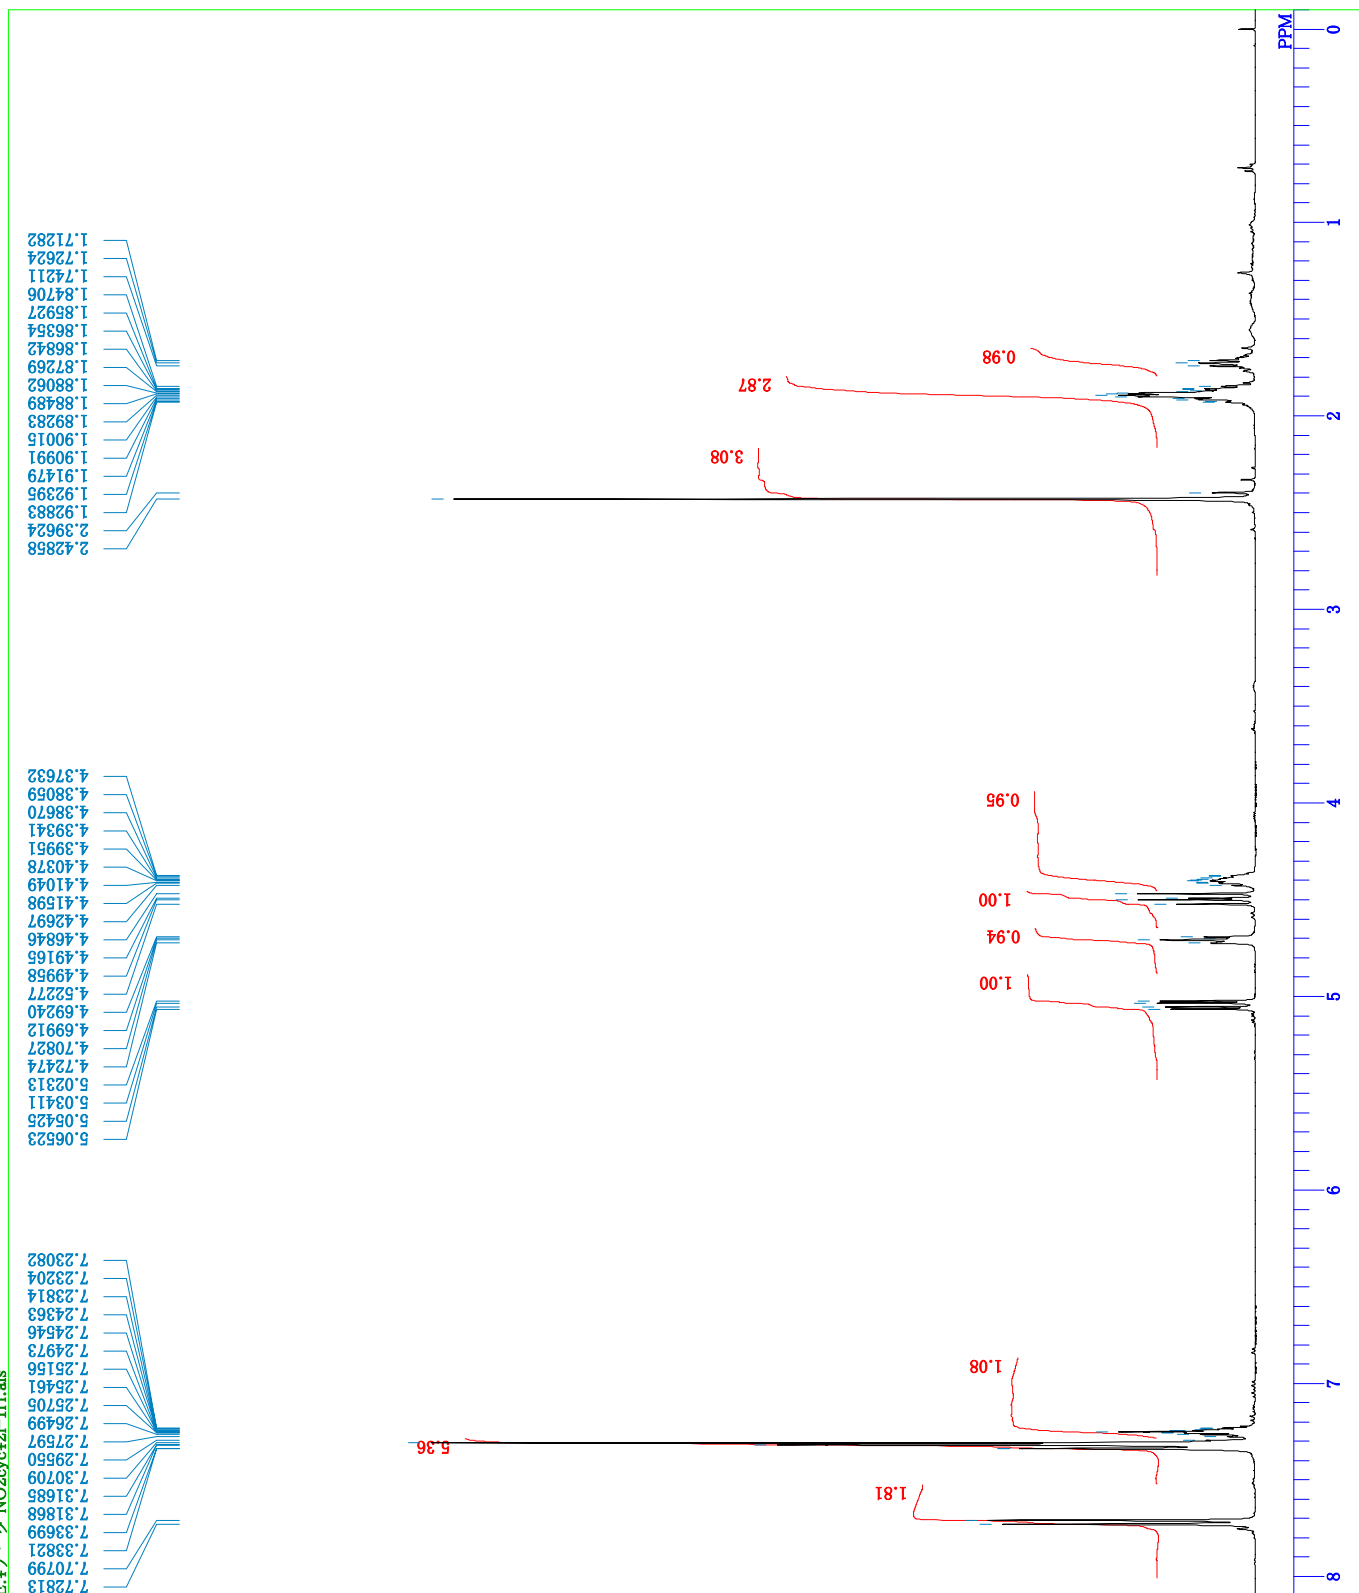

091209

E:\3rd year\NO2\cyc\2f-C.als

2f-C.als  
091209  
Wed Dec 09 15:59:55 2009  
13C  
bcm  
100.40 MHz  
0.00 KHz  
135500.00 Hz  
32768  
27100.27 Hz  
127  
1.2091 sec  
1.7909 sec  
4.90 usec  
1H  
23.0 c  
CDCL3  
77.00 ppm  
0.16 Hz  
26  
RGAIN

DFILE  
COMINT  
DATIM  
OBNUC  
EXMOD  
OBFRQ  
OBSET  
OBFIN  
POINT  
FREQU  
SCANS  
ACQTM  
PD  
PW1  
IRNUC  
CTEMP  
SLVNT  
EXREF  
BF  
RGAIN

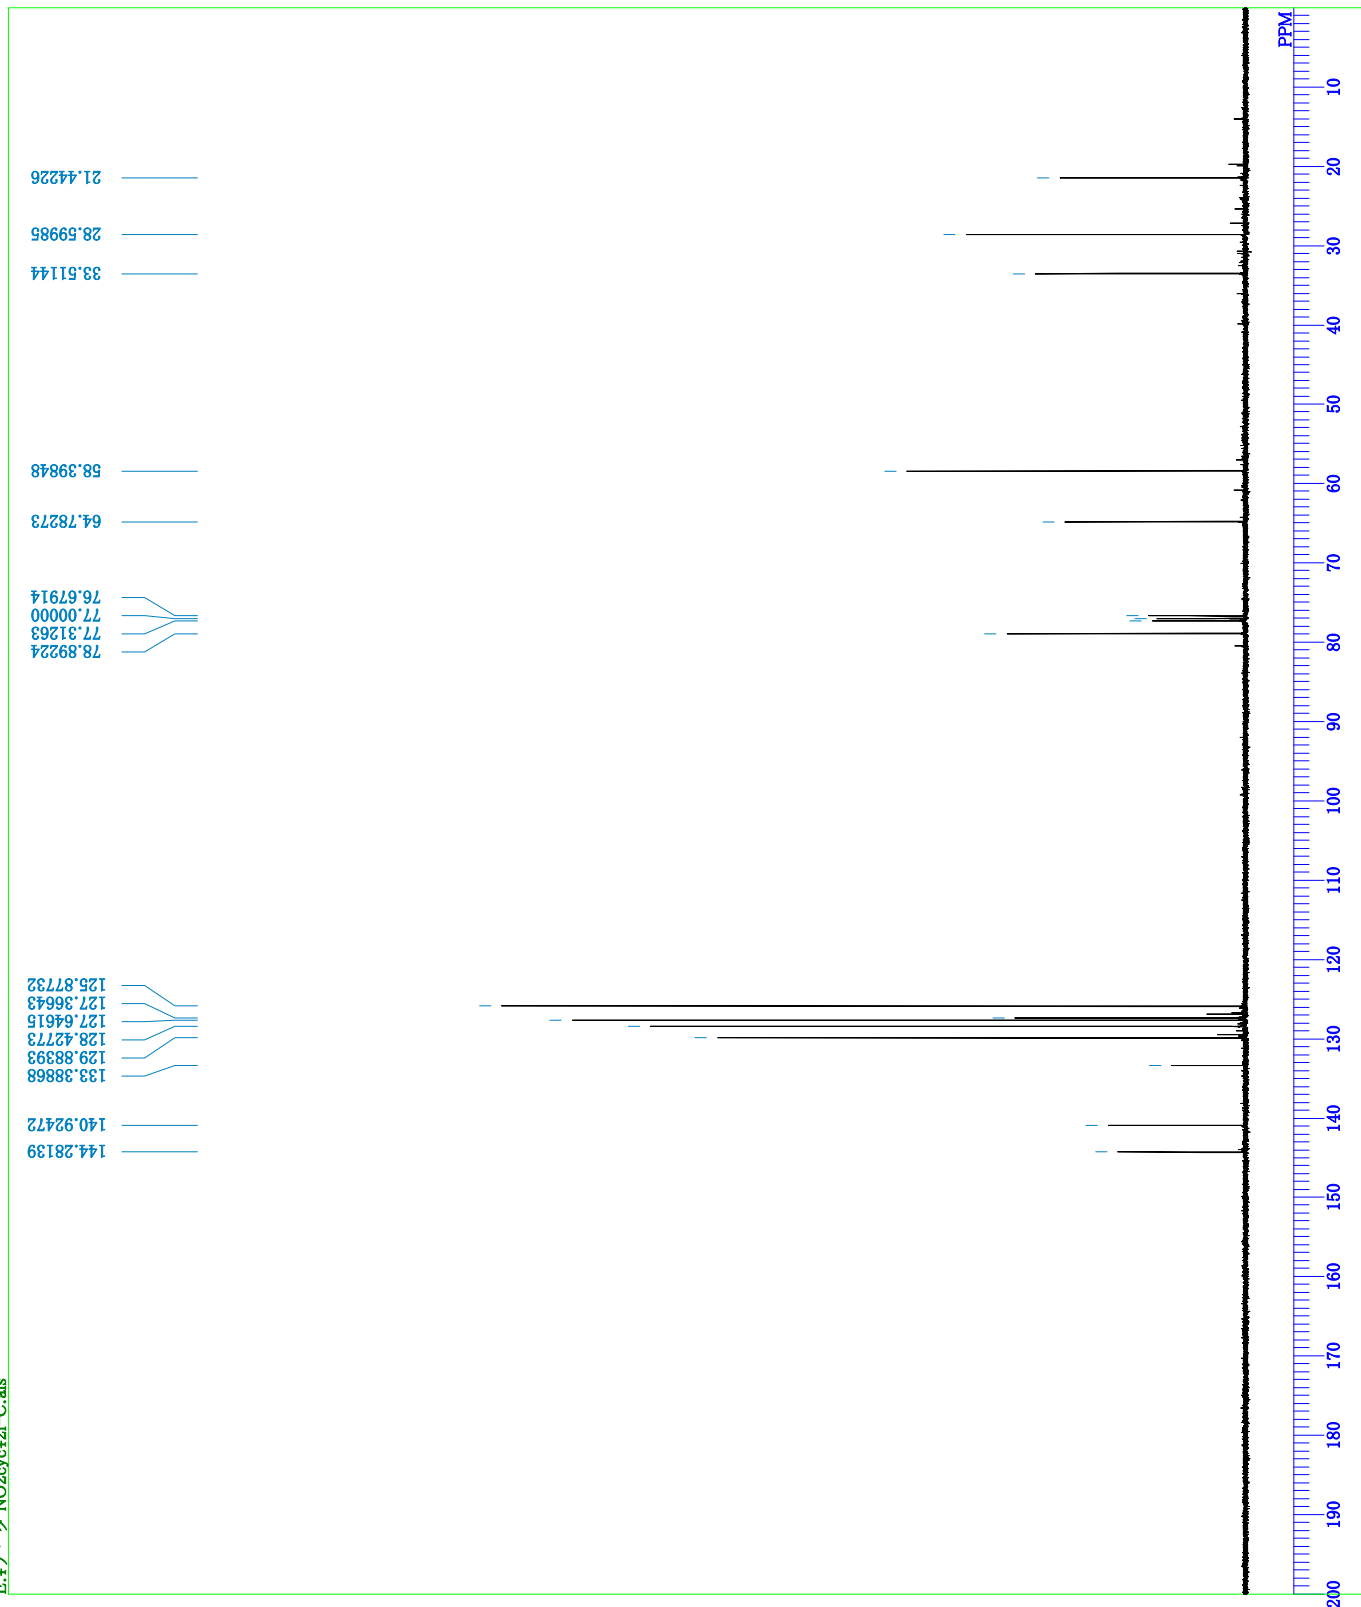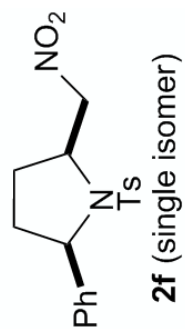

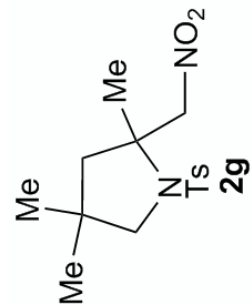

2g-1H.als  
091210  
Thu Dec 10 21:36:39 2009  
1H  
non  
399.65 MHz  
0.00 KHz  
134300.00 Hz  
32768  
7993.60 Hz  
16  
4.0993 sec  
2.9007 sec  
6.80 usec  
1H  
22.4 c  
CDCl3  
0.00 ppm  
0.16 Hz  
19  
RGAIN

DFILE  
COMINT  
DATIM  
OBNUC  
EXMOD  
OBFRQ  
OBSET  
OBFIN  
POINT  
FREQU  
SCANS  
ACQTM  
PD  
PW1  
IRNUC  
CTEMP  
SLVNT  
EXREF  
BF  
RGAIN

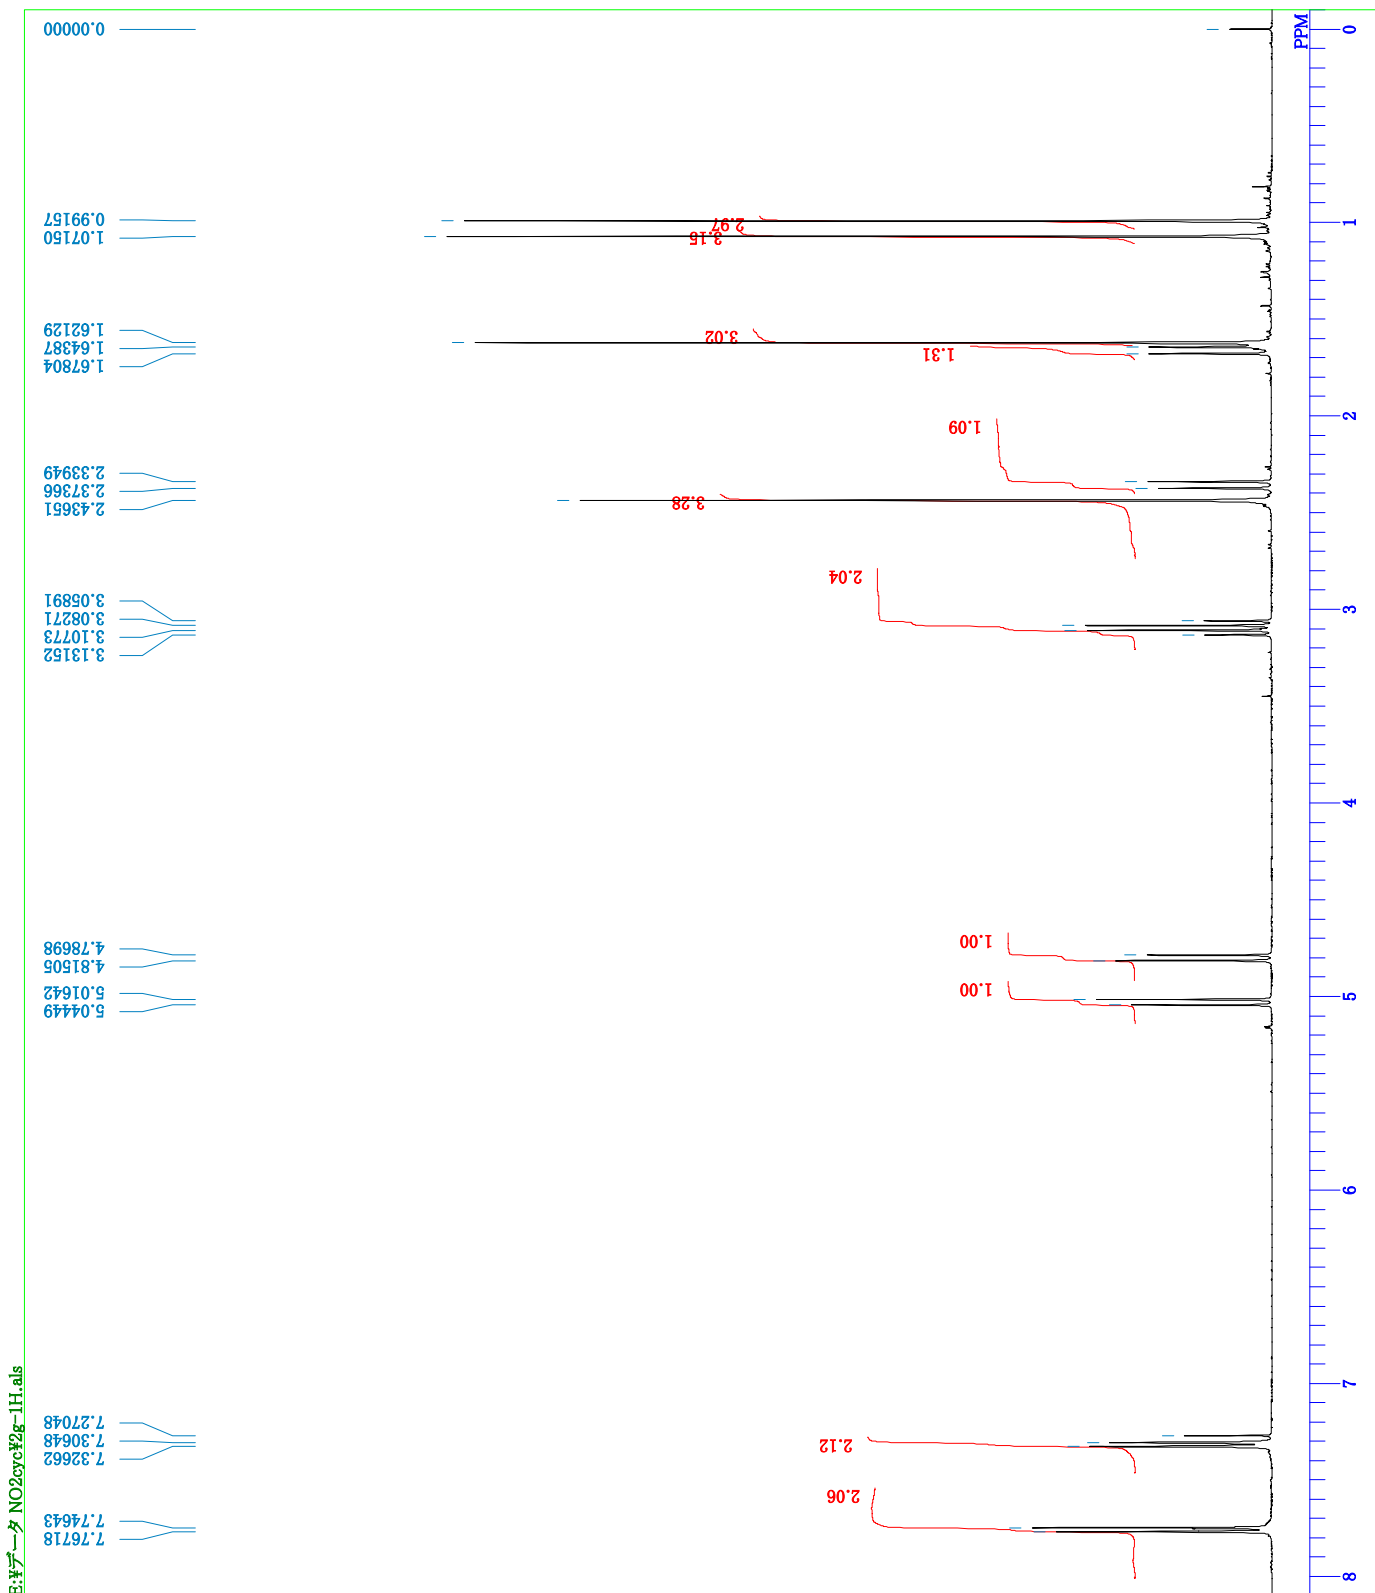



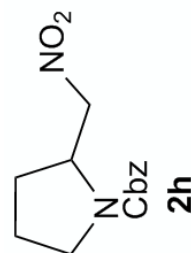

2h-1H.nls  
 091211  
 F11 Dec 11 22:32:23 2009  
 1H  
 non  
 399.65 MHz  
 0.00 KHz  
 134300.00 Hz  
 32768  
 7993.60 Hz  
 9  
 4.0993 sec  
 2.9007 sec  
 6.80 usec  
 1H  
 22.3 c  
 CDCL3  
 0.00 ppm  
 0.12 Hz  
 21  
 RGAIN

DFILE  
 COMINT  
 DATIM  
 OBNUC  
 EXMOD  
 OBFRQ  
 OBSET  
 OBFIN  
 POINT  
 FREQU  
 SCANS  
 ACQTM  
 PD  
 PW1  
 IRNUC  
 CTEMP  
 SLYNT  
 EXREF  
 BF  
 RGAIN

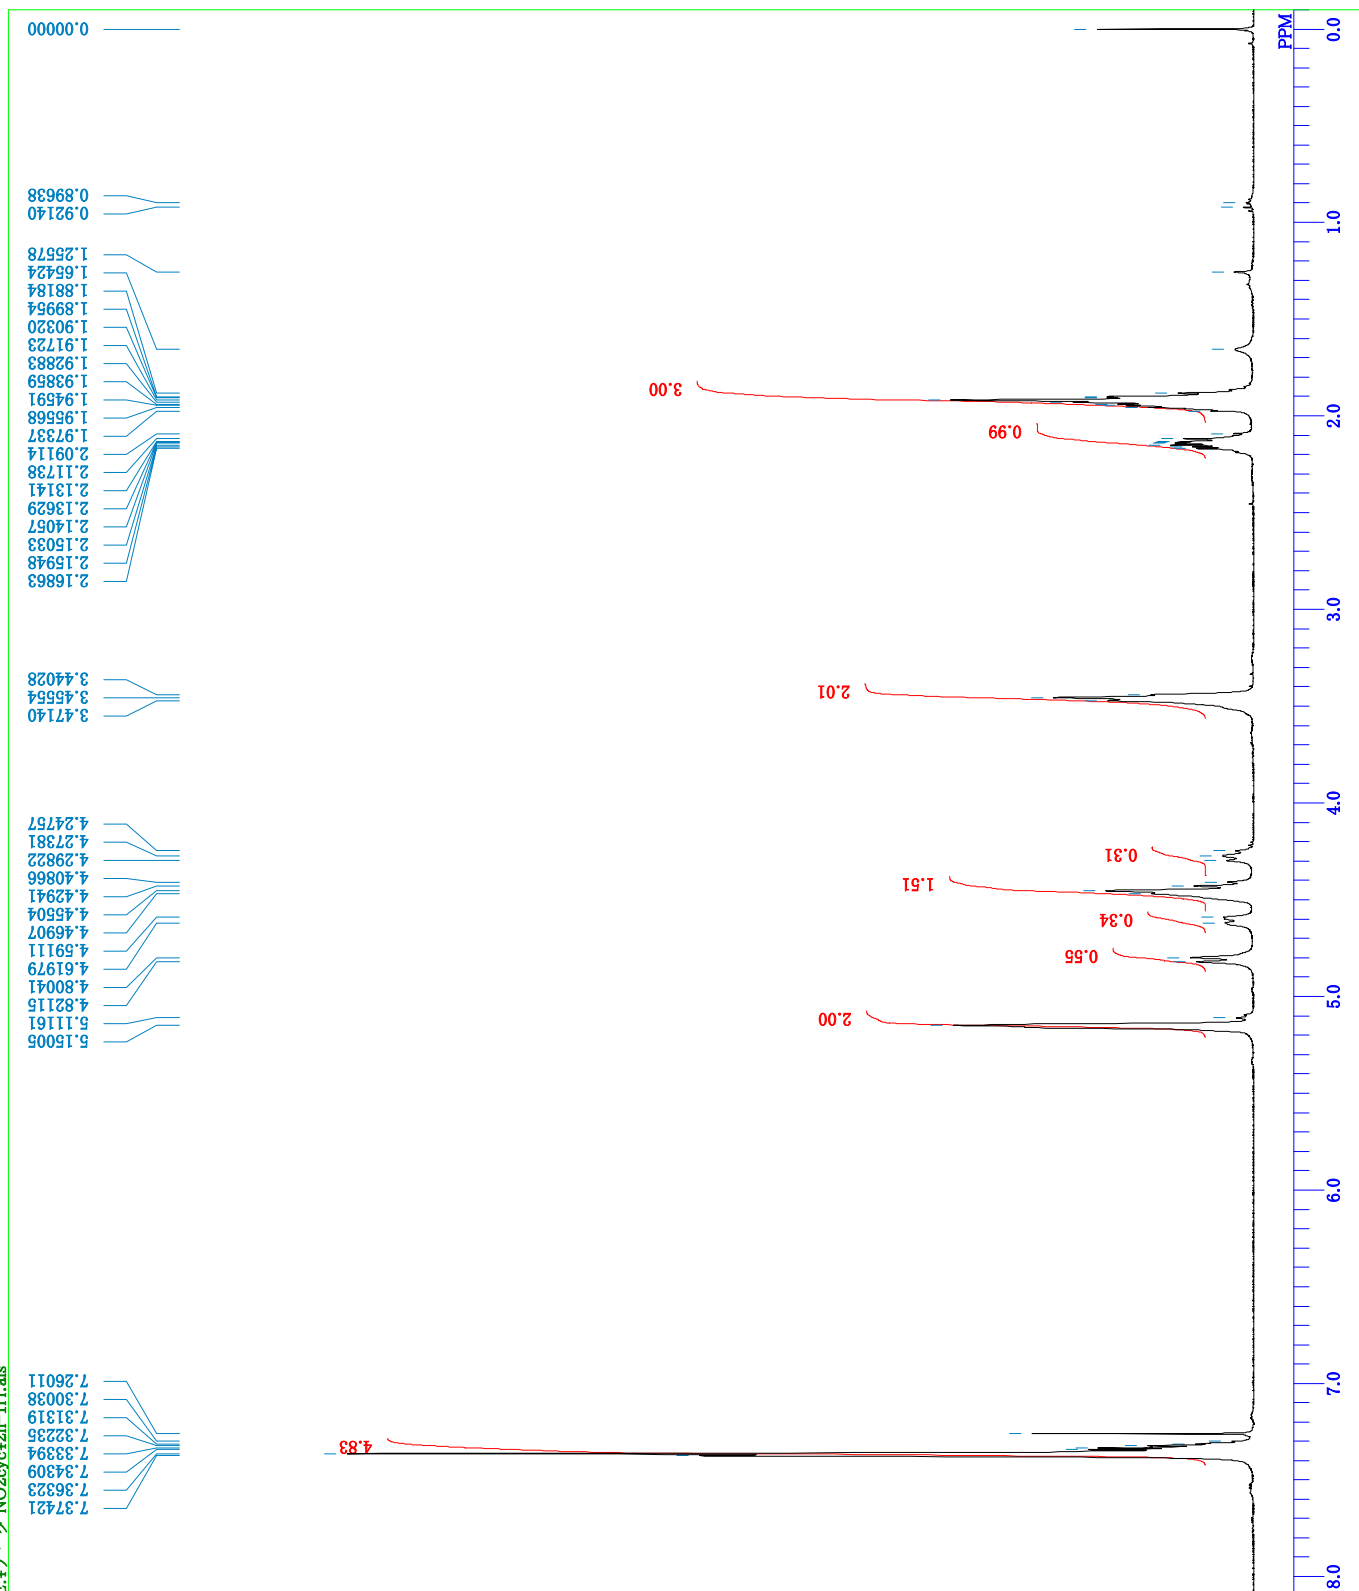

091211

Exp: 2h-C:als NO2cyc2h-C:als

DFILE  
COMINT  
DATIM  
DANUC  
EXMOD  
OBFRQ  
OBSET  
OBFIN  
POINT  
FREQU  
SCANS  
ACQTM  
PD  
PW1  
IRNUC  
CTEMP  
SLVNT  
EXREF  
BF  
RGAIN

2h-C:als  
091211  
Sat Dec 12 00:32:25 2009  
bcm  
100.40 MHz  
0.00 KHz  
135500.00 Hz  
32768  
27100.27 Hz  
2344  
1.2091 sec  
1.7909 sec  
4.90 usec  
1H  
23.4 c  
CDCL3  
77.00 ppm  
0.12 Hz  
26

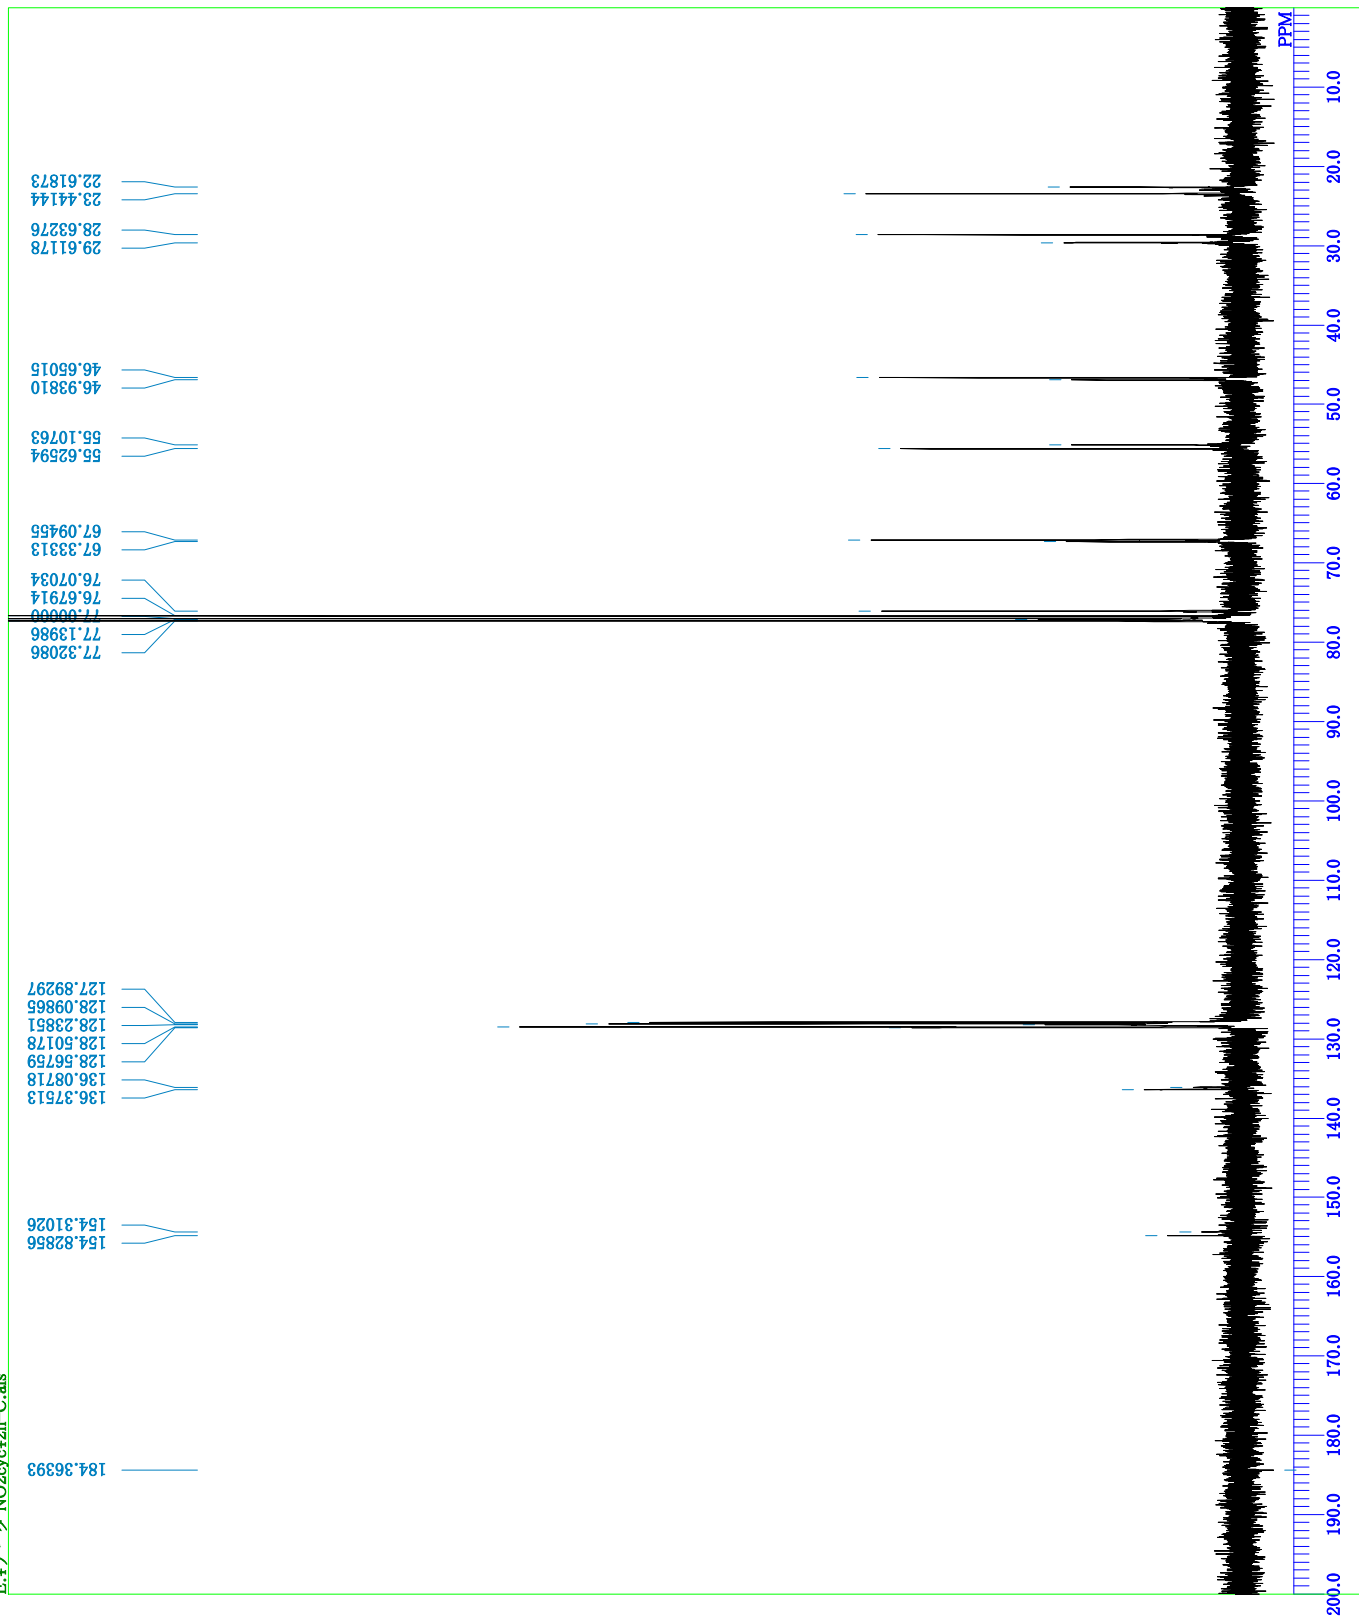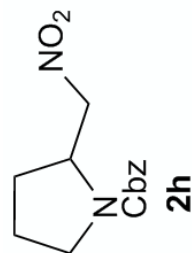



100216

E:\3-1-2 NO2cyc2i-1H.als

2i-1H.als  
100216  
16-02-2010 22:25:41  
1H  
single\_pulse.ex2  
600.17 MHz  
5.30 KHz  
5.47 Hz  
13107  
9008.87 Hz  
16  
1.4549 sec  
2.0000 sec  
6.50 usec  
1H  
18.5 c  
CDCL3  
0.00 ppm  
0.24 Hz  
34  
RGAIN

DFILE  
COMINT  
DATIM  
OBNUC  
EXMOD  
OBFRQ  
OBSET  
OBFIN  
POINT  
FREQU  
SCANS  
ACQTM  
PD  
PW1  
IRNUC  
CTEMP  
SLVNT  
EXREF  
BF  
RGAIN

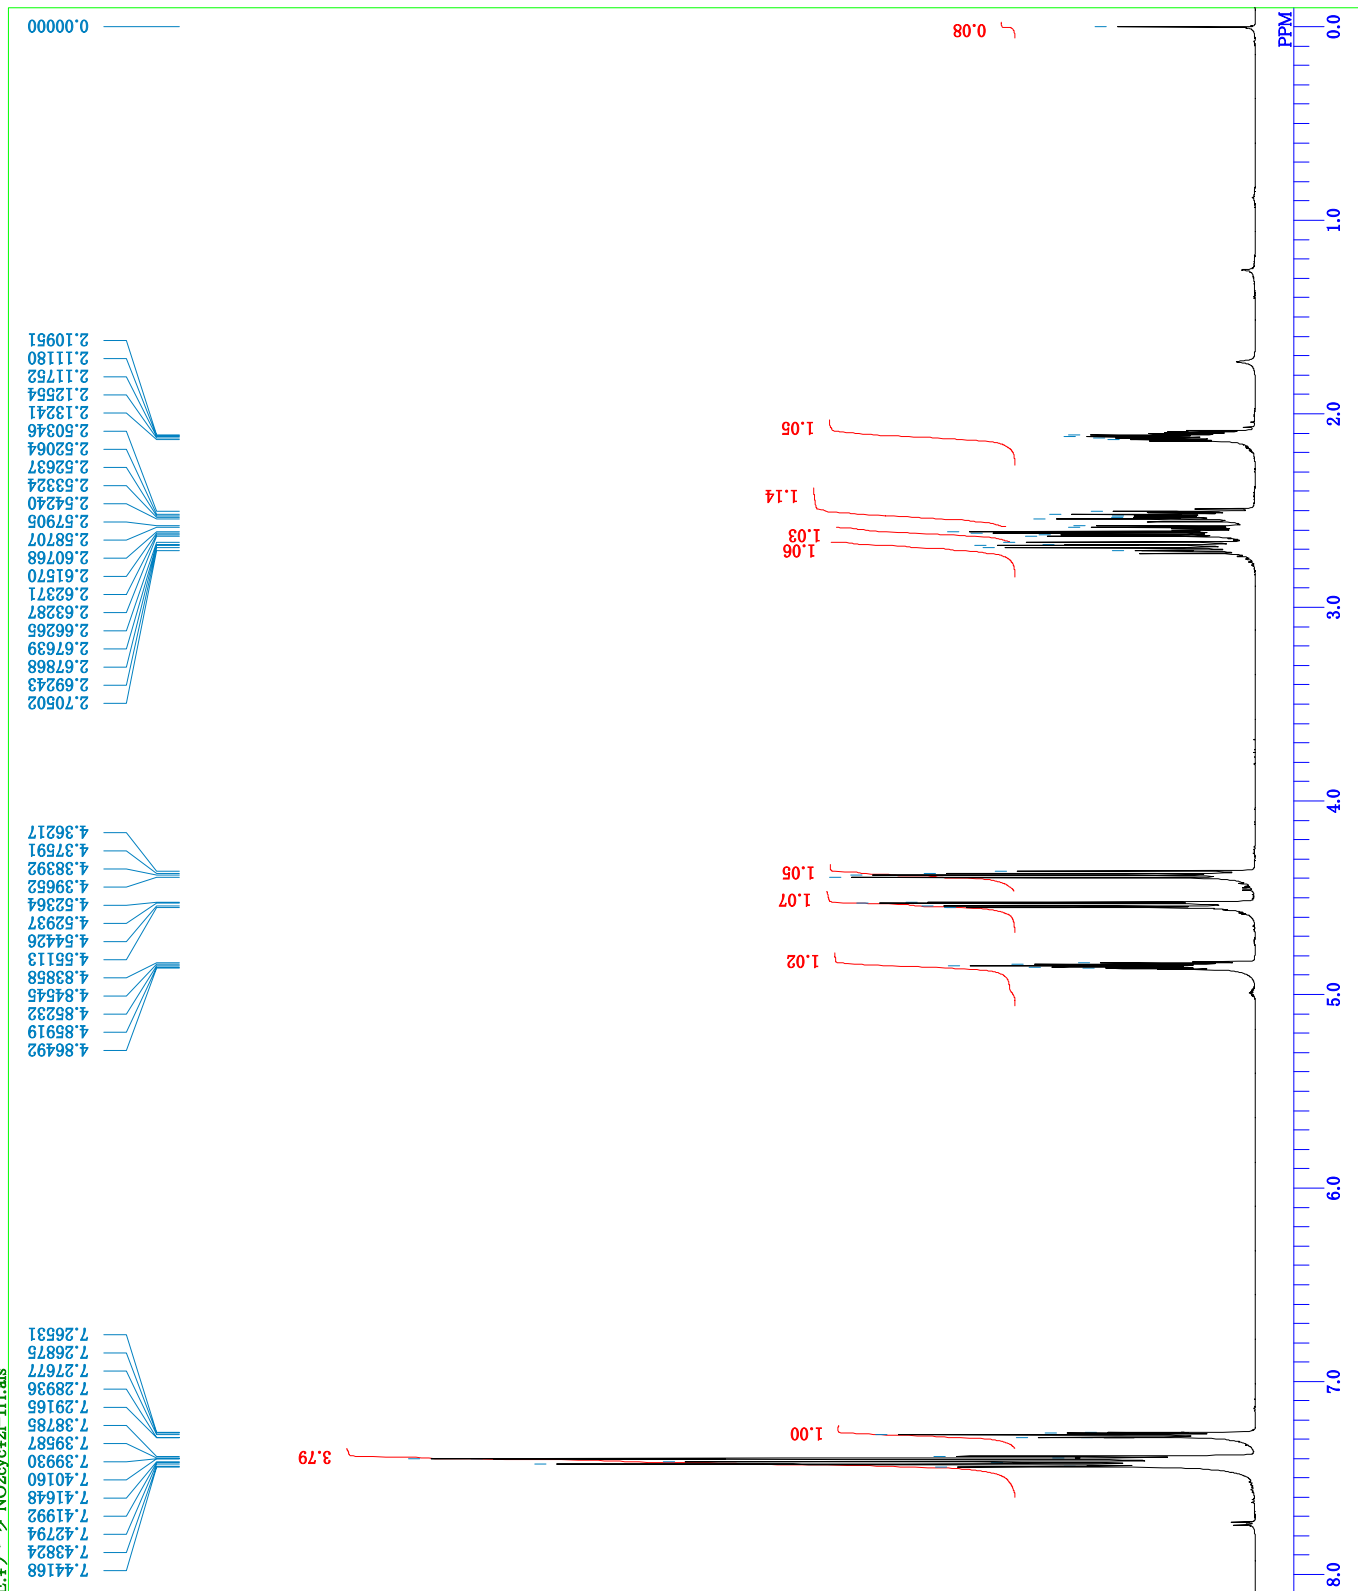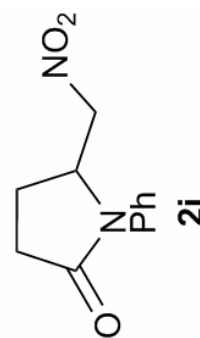

091214

E:3:3アーク NO2cyrc#2i-C.als

DFILE 091214  
COMINT 14-12-2009 22:48:31  
DATIM 13C  
OBNUC single\_pulse\_dec  
EXMOD 100.53 MHz  
OBFRQ 5.35 KHz  
OBSET 5.86 Hz  
OBFIN 20970  
POINT 20099.89 Hz  
FREQU 258  
SCANS 1.0433 sec  
ACQTM 1.2000 sec  
PD 2.87 usec  
PW1 1H  
IRNUC 20.5 c  
CTEMP CDCL3  
SLVNT 77.00 ppm  
EXREF 0.00 Hz  
BF 60  
RGAIN

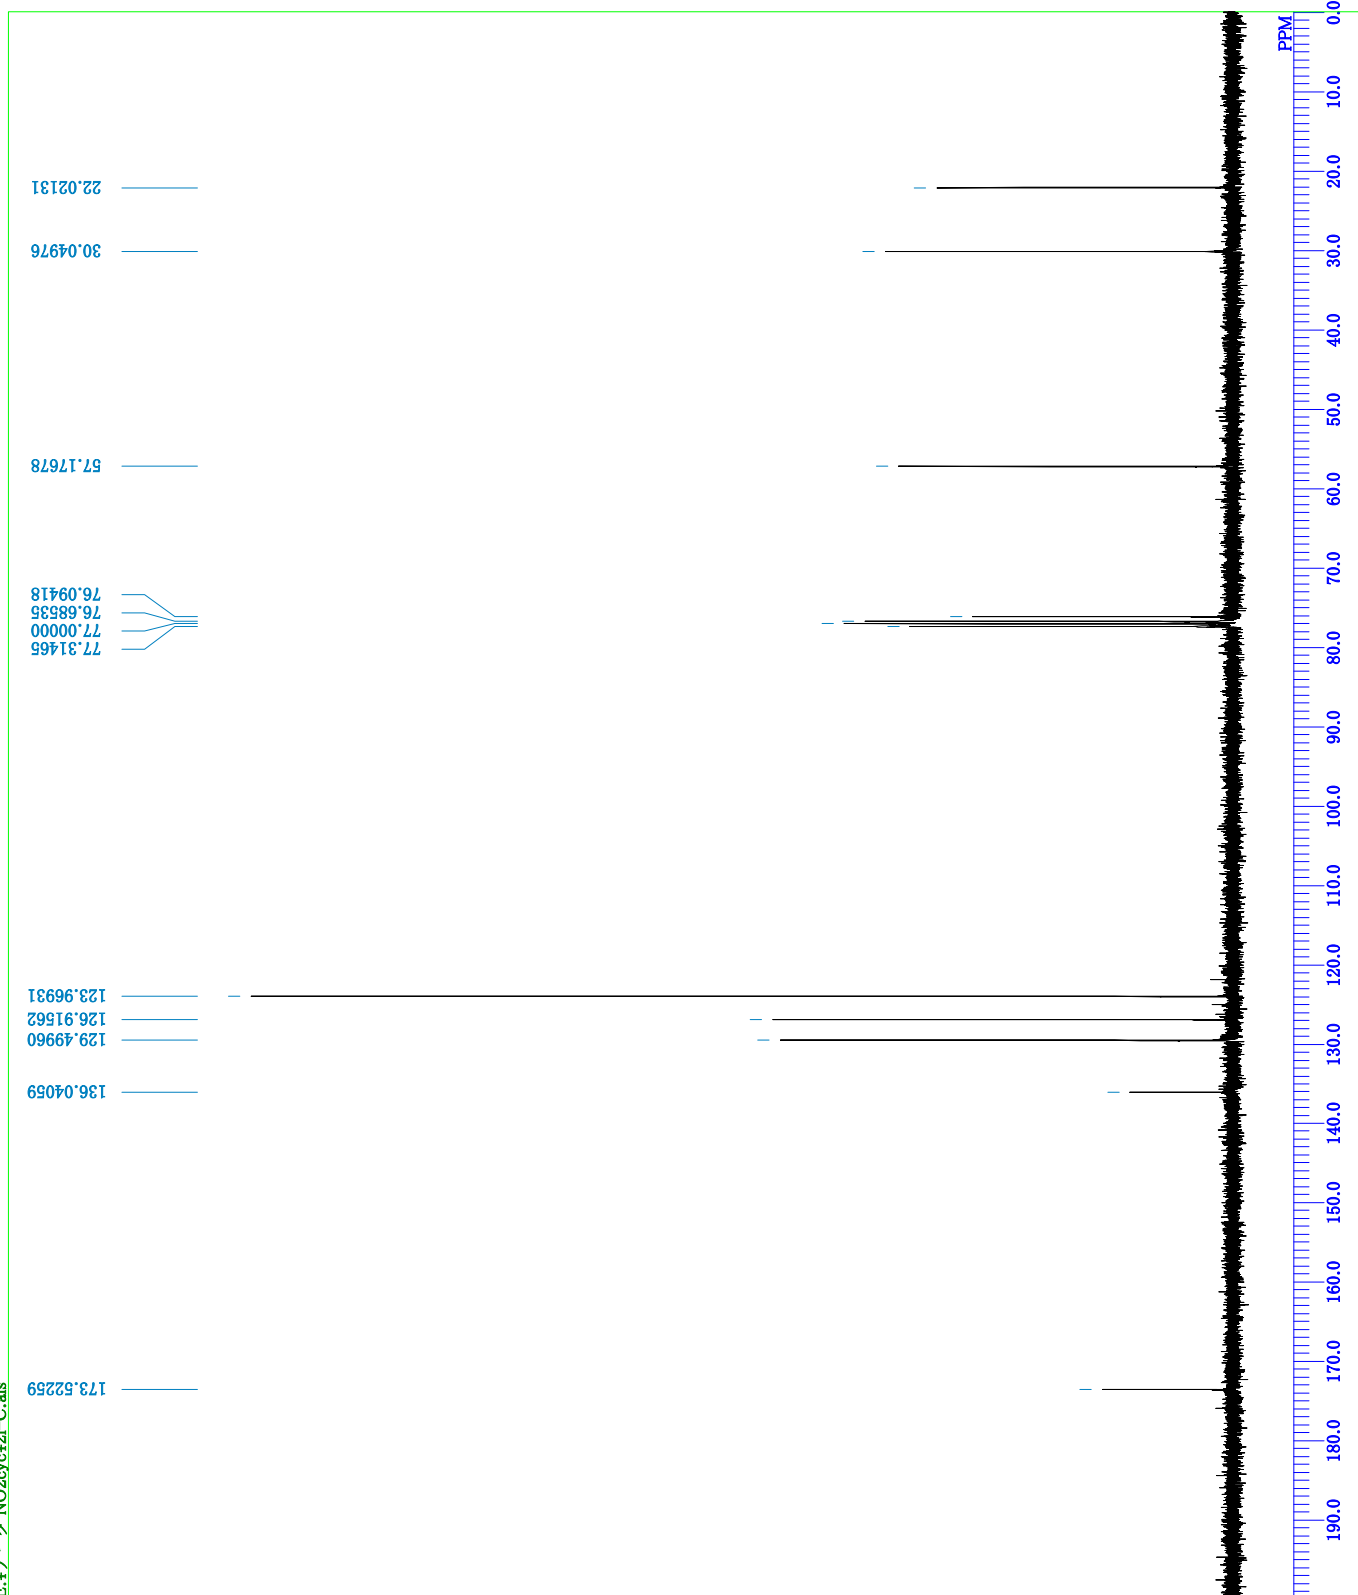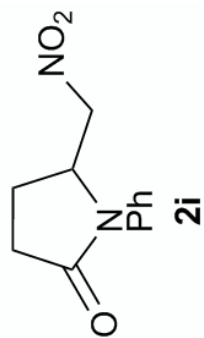

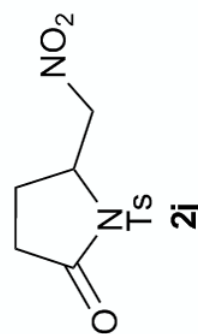

2j-1H.als  
 091211  
 Fri Dec 11 22:06:04 2009  
 1H  
 non  
 399.65 MHz  
 0.00 KHz  
 134300.00 Hz  
 32768  
 7993.60 Hz  
 16  
 4.0993 sec  
 2.9007 sec  
 6.80 usec  
 1H  
 22.0 c  
 CDCl3  
 0.00 ppm  
 0.12 Hz  
 22  
 RGAIN

DFILE  
 COMINT  
 DATIM  
 OBNUC  
 EXMOD  
 OBFRQ  
 OBSET  
 OBFIN  
 POINT  
 FREQU  
 SCANS  
 ACQTM  
 PD  
 PW1  
 IRNUC  
 CTEMP  
 SLVNT  
 EXREF  
 BF  
 RGAIN

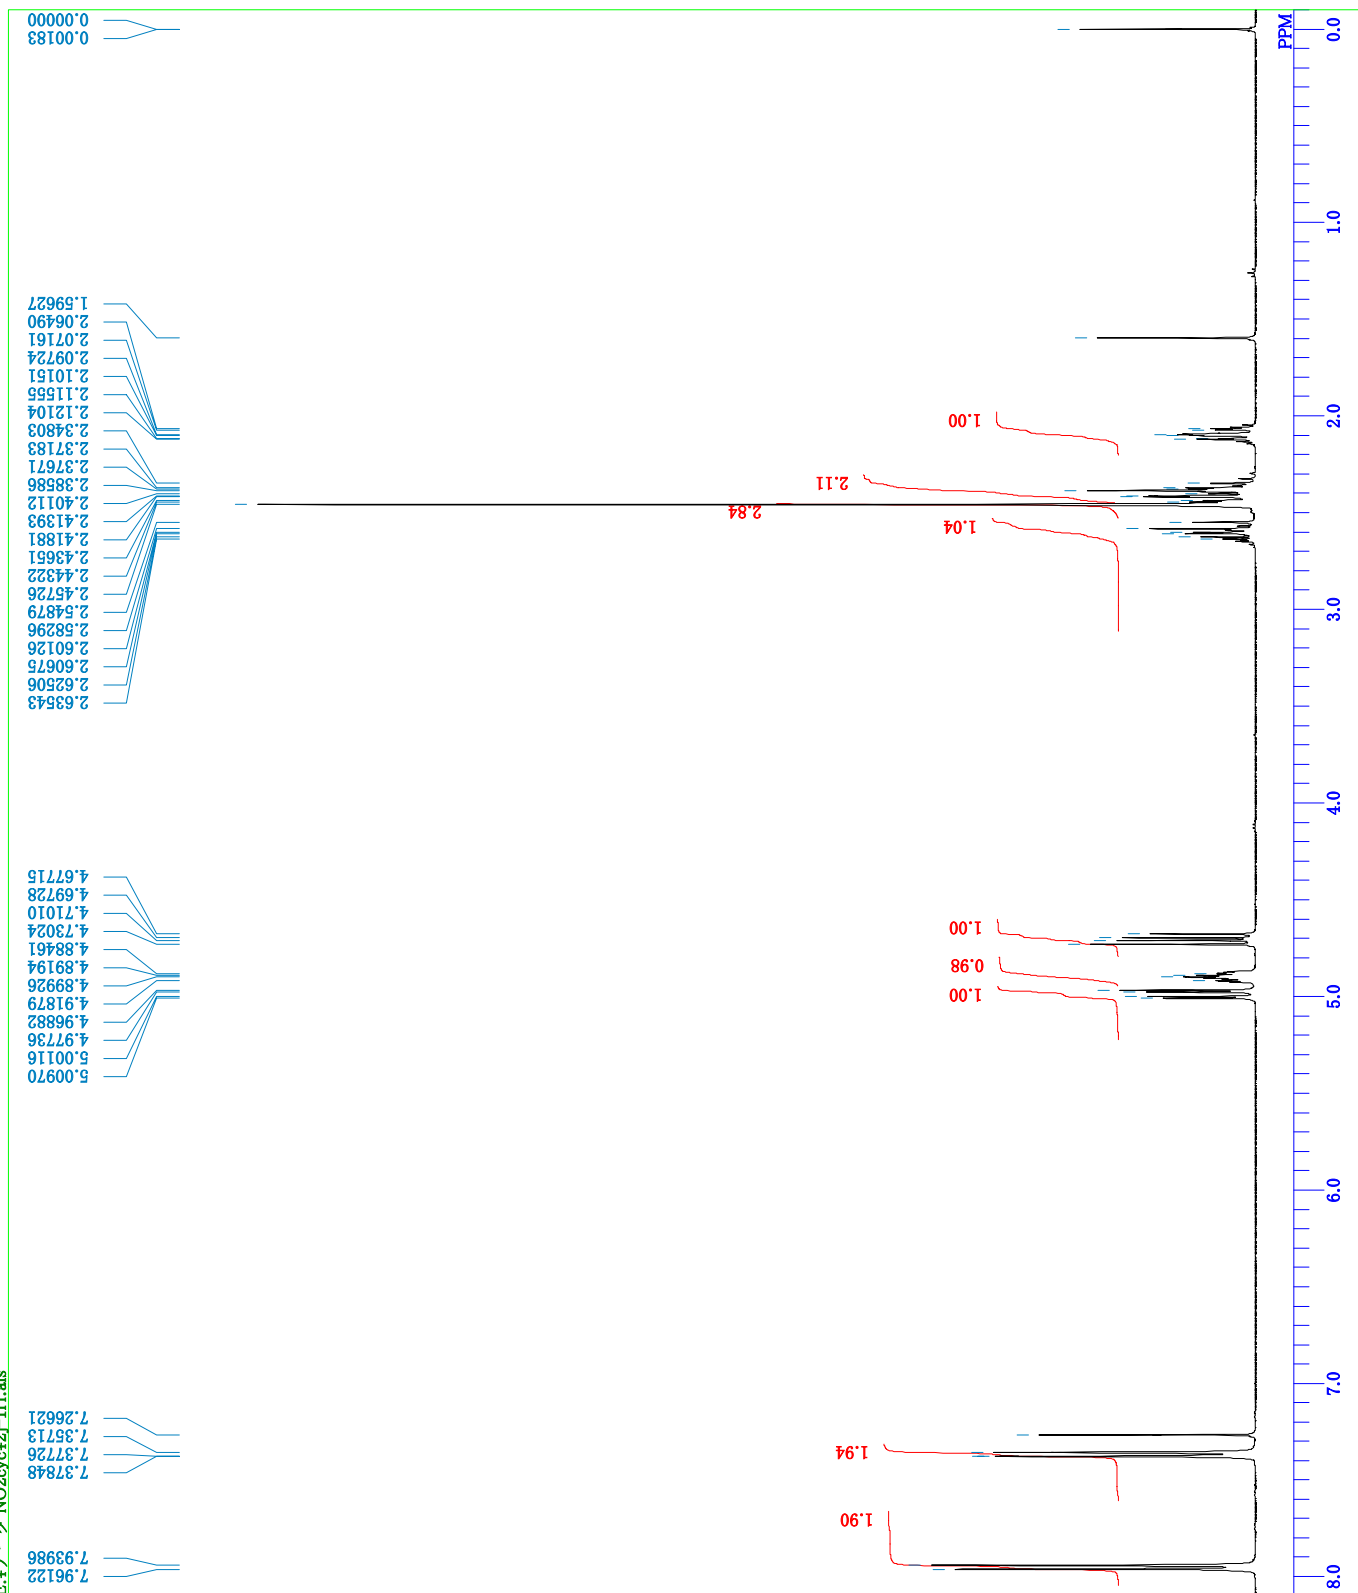

091211

E: 2j-C.als NO2cyrc2j-C.als

DFILE 091211  
COMINT 091211  
DATIM Fri Dec 11 22:22:34 2009  
OBNUC 13C  
EXMOD 100.40 MHz  
OBFRQ 0.00 KHz  
OBSET 135500.00 Hz  
OBFIN 32768  
POINT 27100.27 Hz  
FREQU 311  
SCANS 1.2091 sec  
ACQTM 1.7909 sec  
PD 4.90 usec  
PW1 1H  
IRNUC 23.5 c  
CTEMP CDCL3  
SLVNT 77.00 ppm  
EXREF 0.12 Hz  
BF 26  
RGAIN

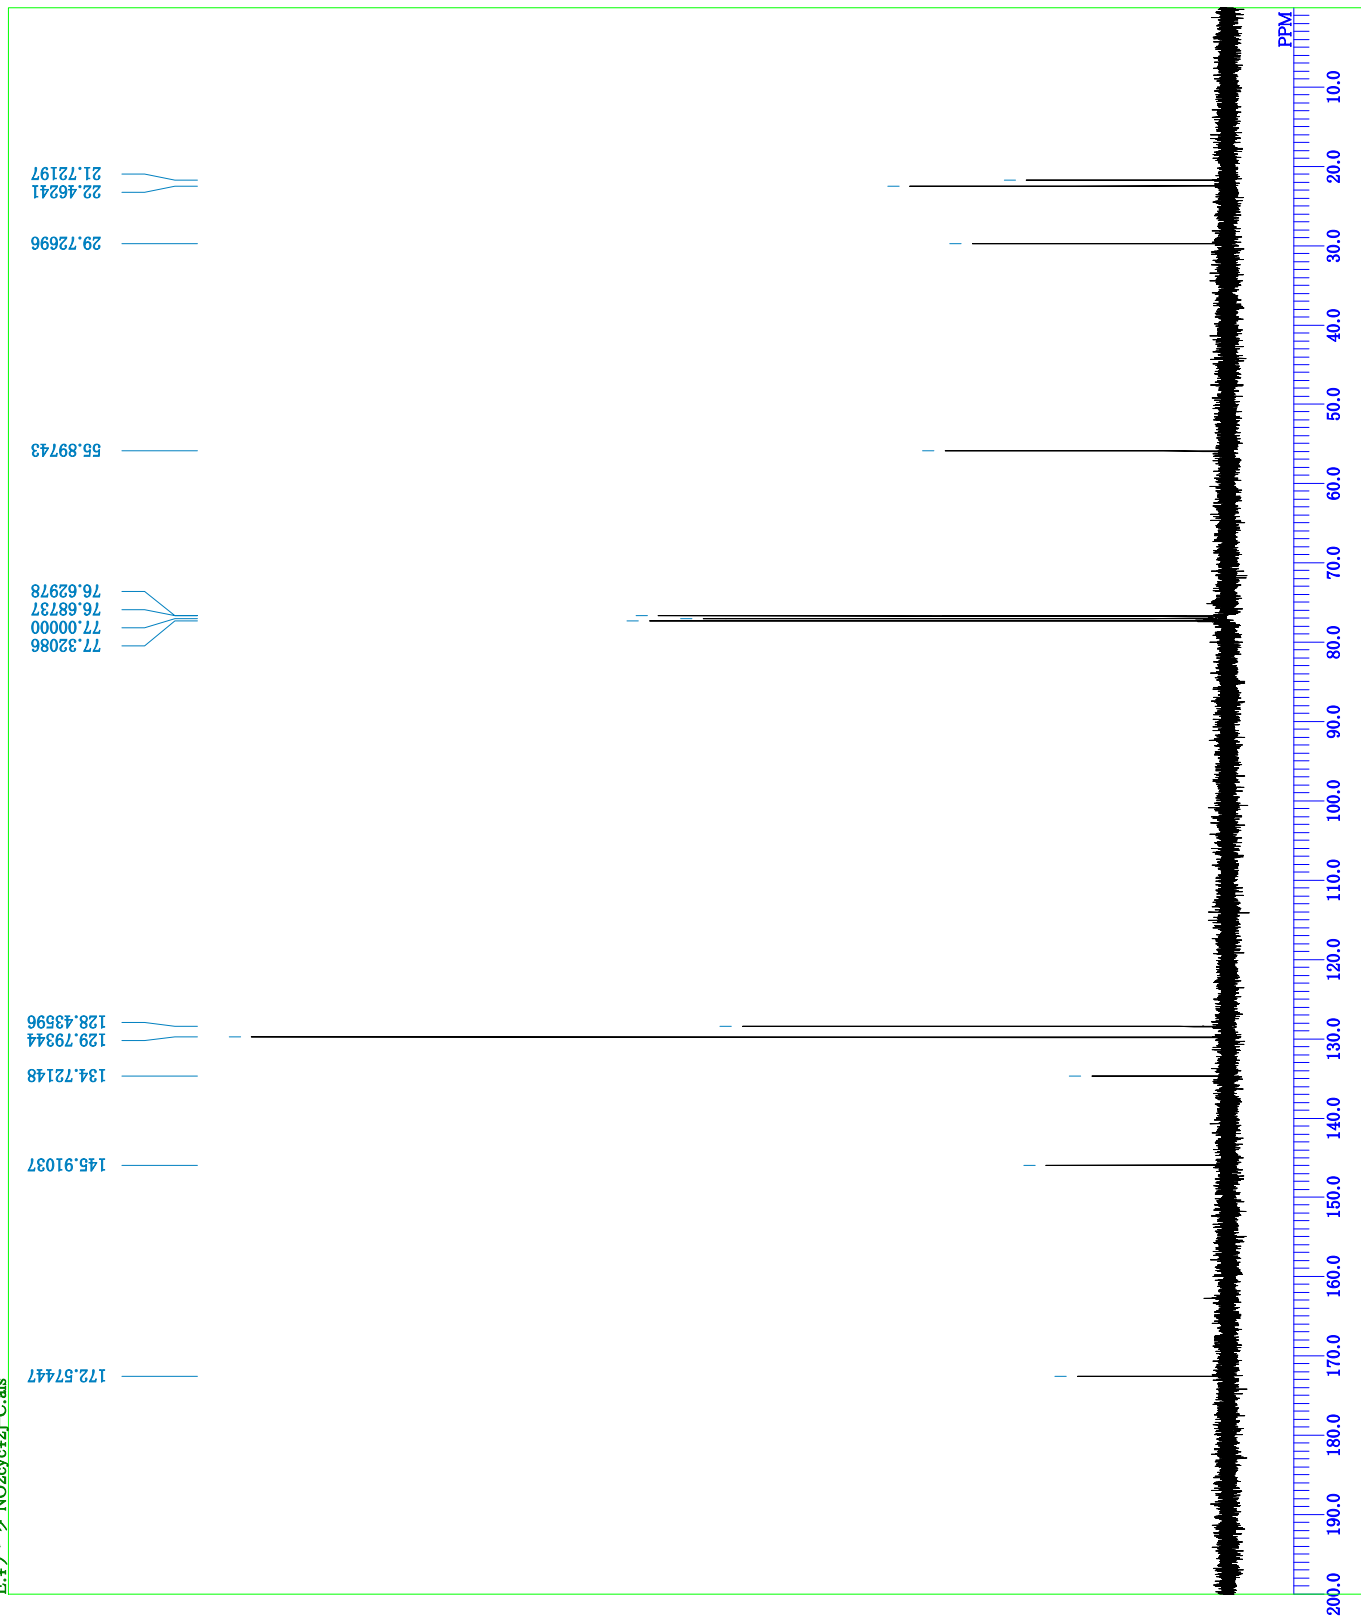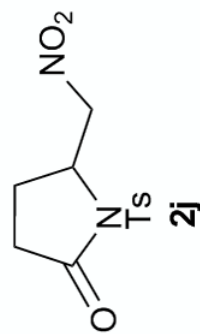

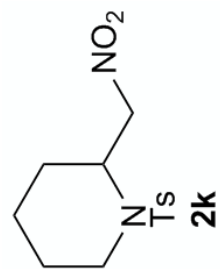

2k-1H.als  
091205  
Set Dec 05 09:59:58 2009  
1H  
non  
399.65 MHz  
0.00 KHz  
134300.00 Hz  
32768  
7993.60 Hz  
4.0993 sec  
2.9007 sec  
6.80 usec  
1H  
21.3 c  
CDCL3  
0.00 ppm  
0.16 Hz  
18  
RGAIN

DFILE  
COMINT  
DATIM  
OBNUC  
EXMOD  
OBFRQ  
OBSET  
OBFIN  
POINT  
FREQU  
SCANS  
ACQTM  
PD  
PW1  
IRNUC  
CTEMP  
SLVNT  
EXREF  
BF  
RGAIN

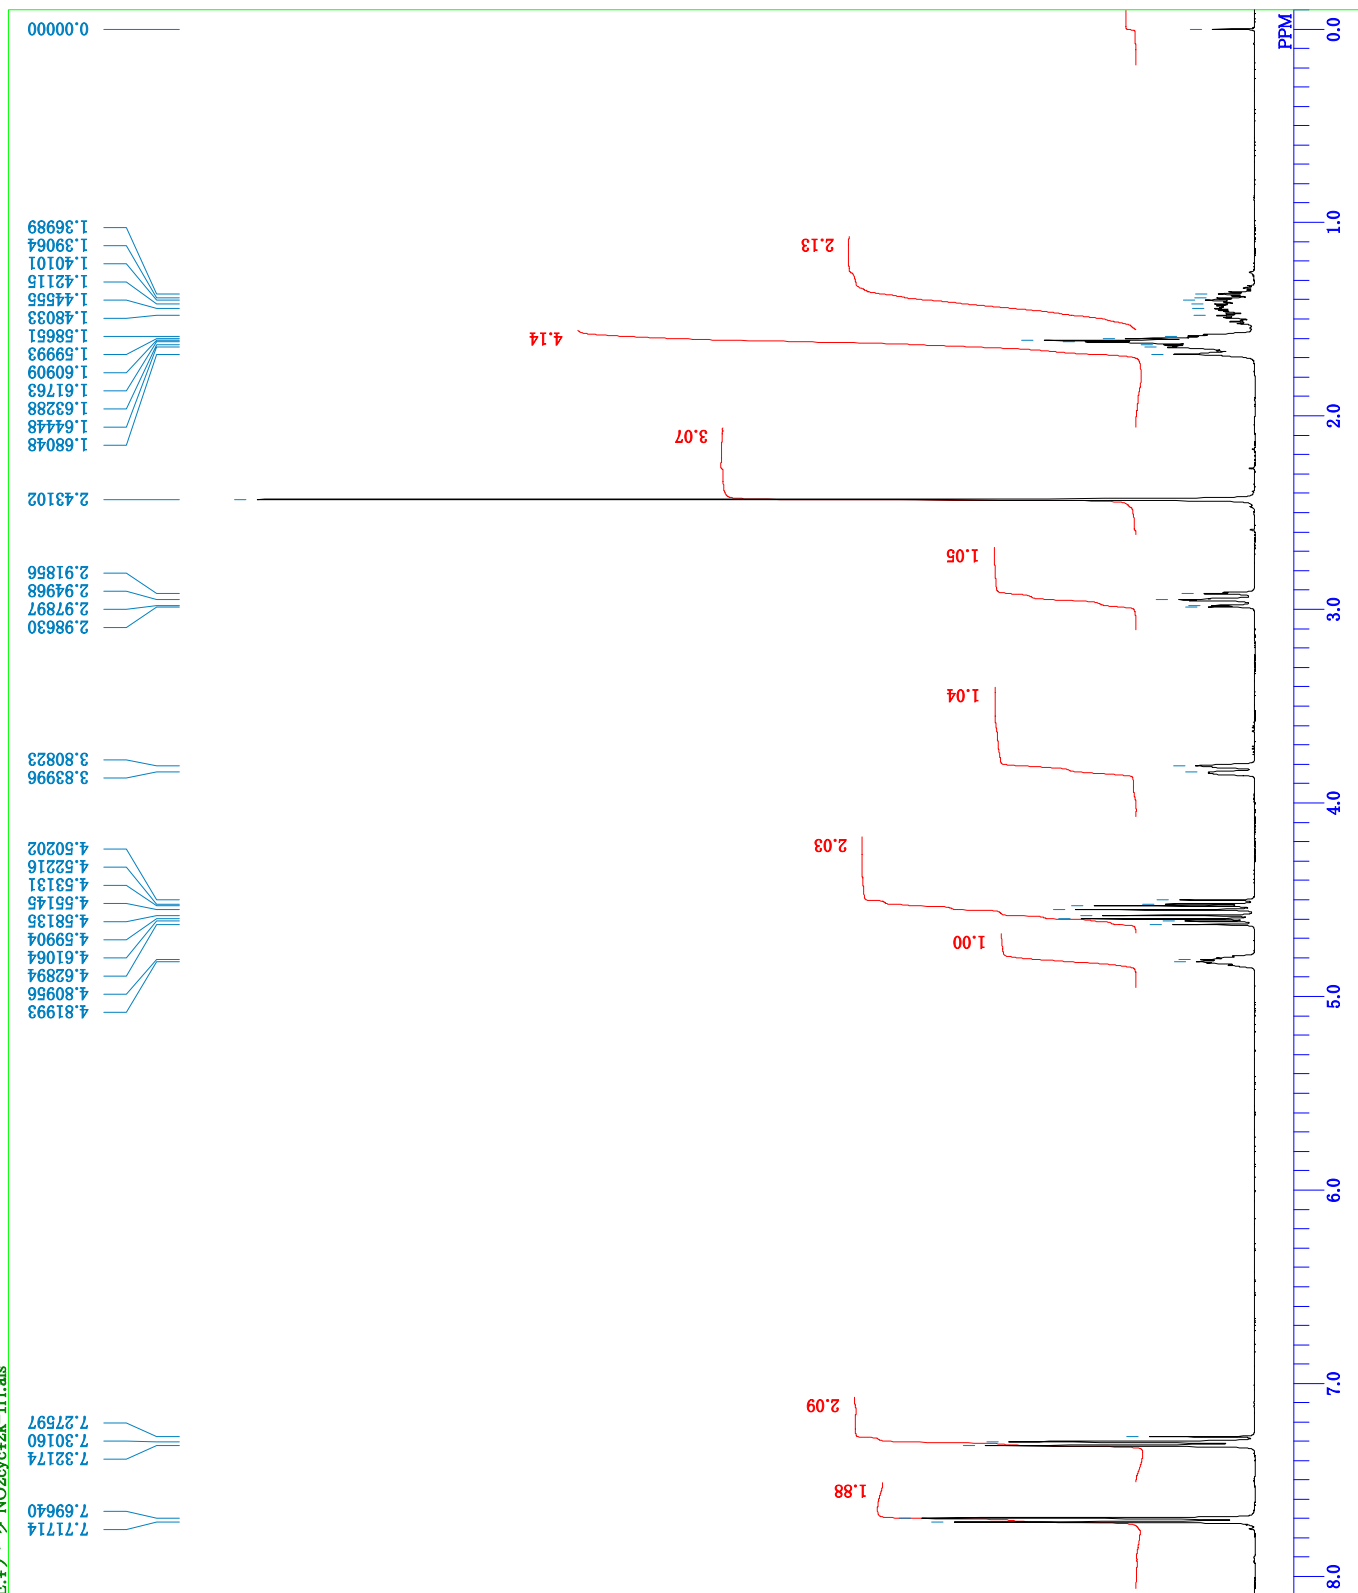

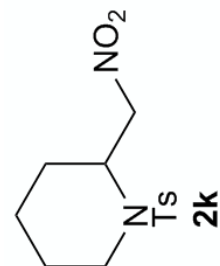

2k-C.als  
091205  
Sat Dec 05 10:06:58 2009  
13C  
bcm  
100.40 MHz  
0.00 KHz  
135500.00 Hz  
32768  
27100.27 Hz  
128  
1.2091 sec  
1.7909 sec  
4.90 usec  
IH  
22.3 c  
CDCL3  
77.00 ppm  
0.16 Hz  
26  
RGAIN

DFILE  
COMINT  
DATIM  
OBNUC  
EXMOD  
OBFRQ  
OBSET  
OBFIN  
POINT  
FREQU  
SCANS  
ACQTM  
PD  
PW1  
IRNUC  
CTEMP  
SLVNT  
EXREF  
BF  
RGAIN

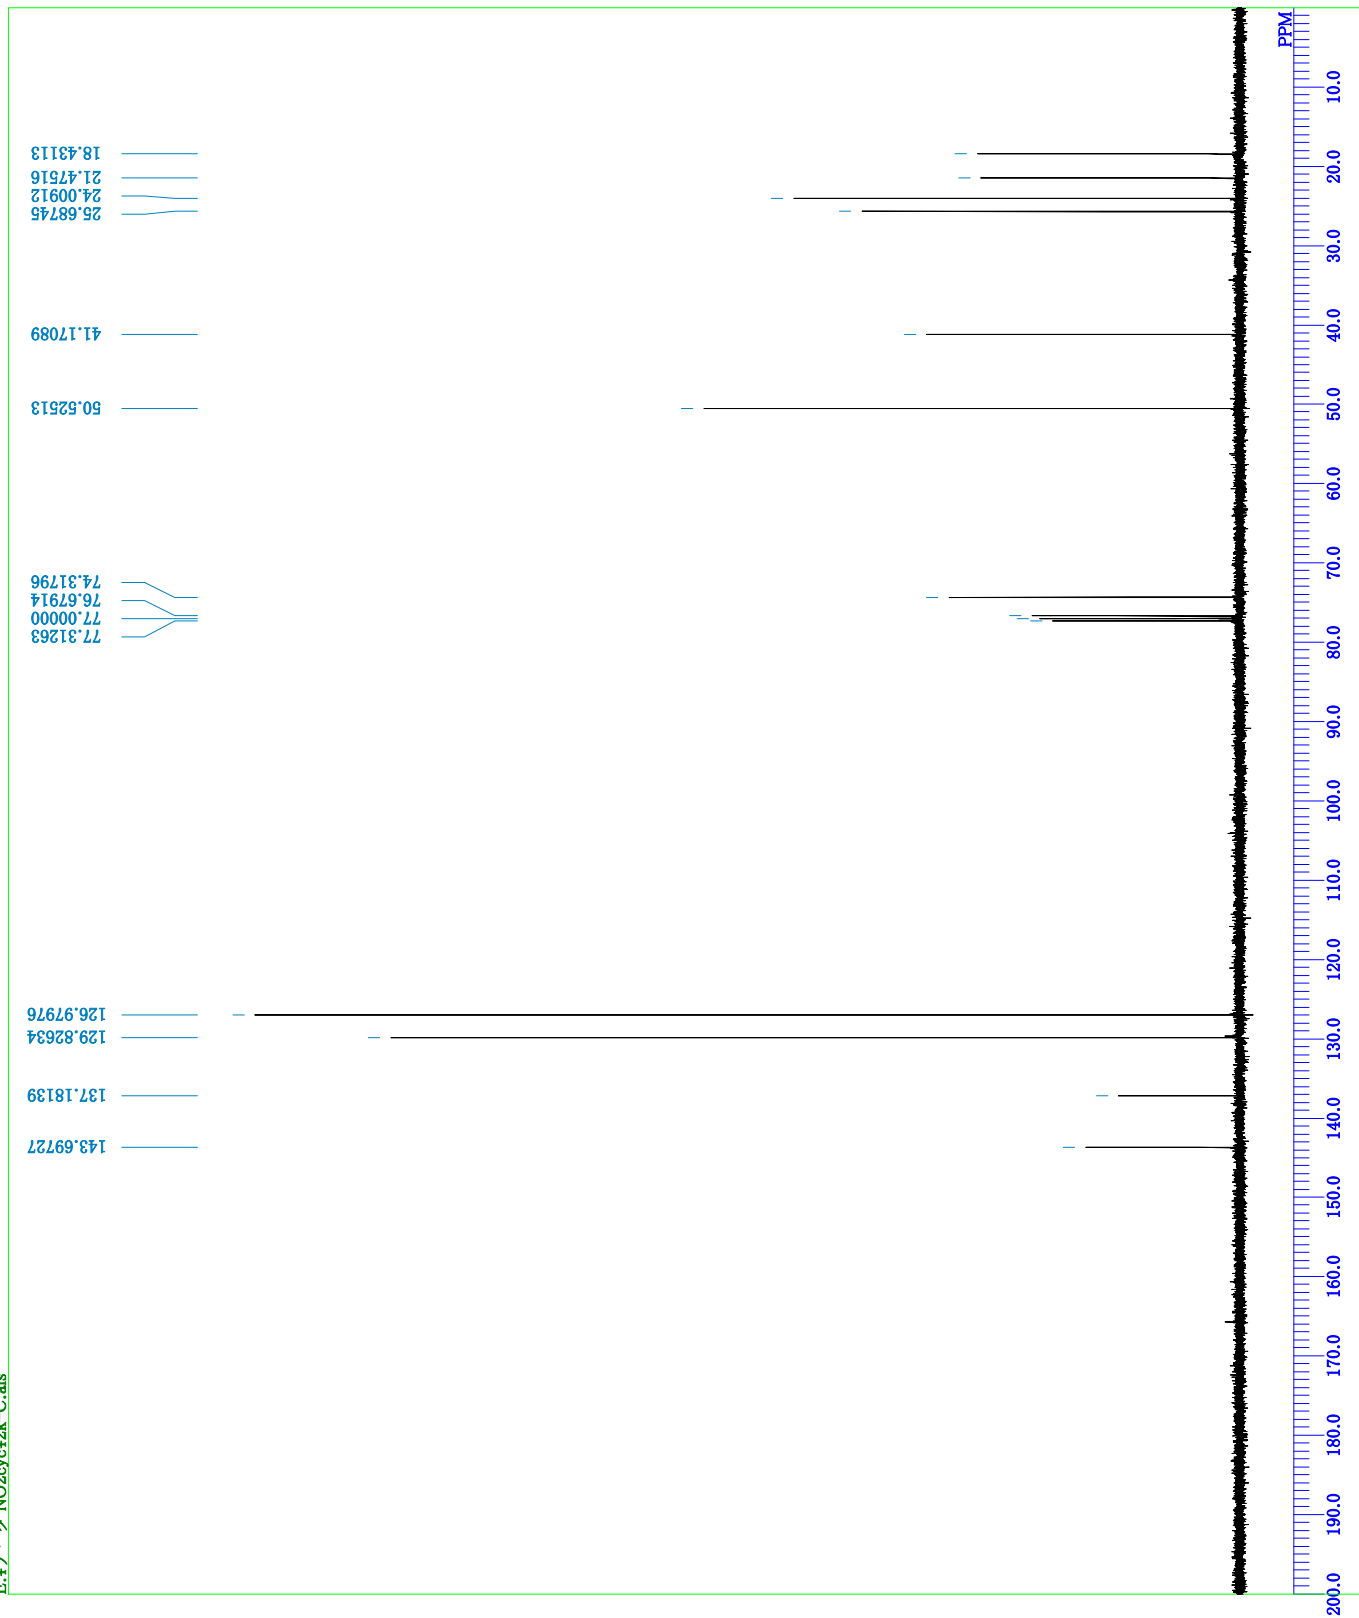

2l-1H.als  
091209  
Wed Dec 09 16:05:26 2009  
IH  
non  
399.65 MHz  
0.00 KHz  
134300.00 Hz  
32768  
7993.60 Hz  
4.0993 sec  
2.9007 sec  
6.80 usec  
IH  
22.1 c  
CDCL3  
0.00 ppm  
0.16 Hz  
19  
RGAIN

DFILE  
COMINT  
DATUM  
OBNUC  
EXMOD  
OBFRQ  
OBSET  
OBFIN  
POINT  
FREQU  
SCANS  
ACQTM  
PD  
PW1  
IRNUC  
CTEMP  
SLVNT  
EXREF  
BF  
RGAIN

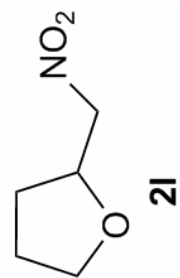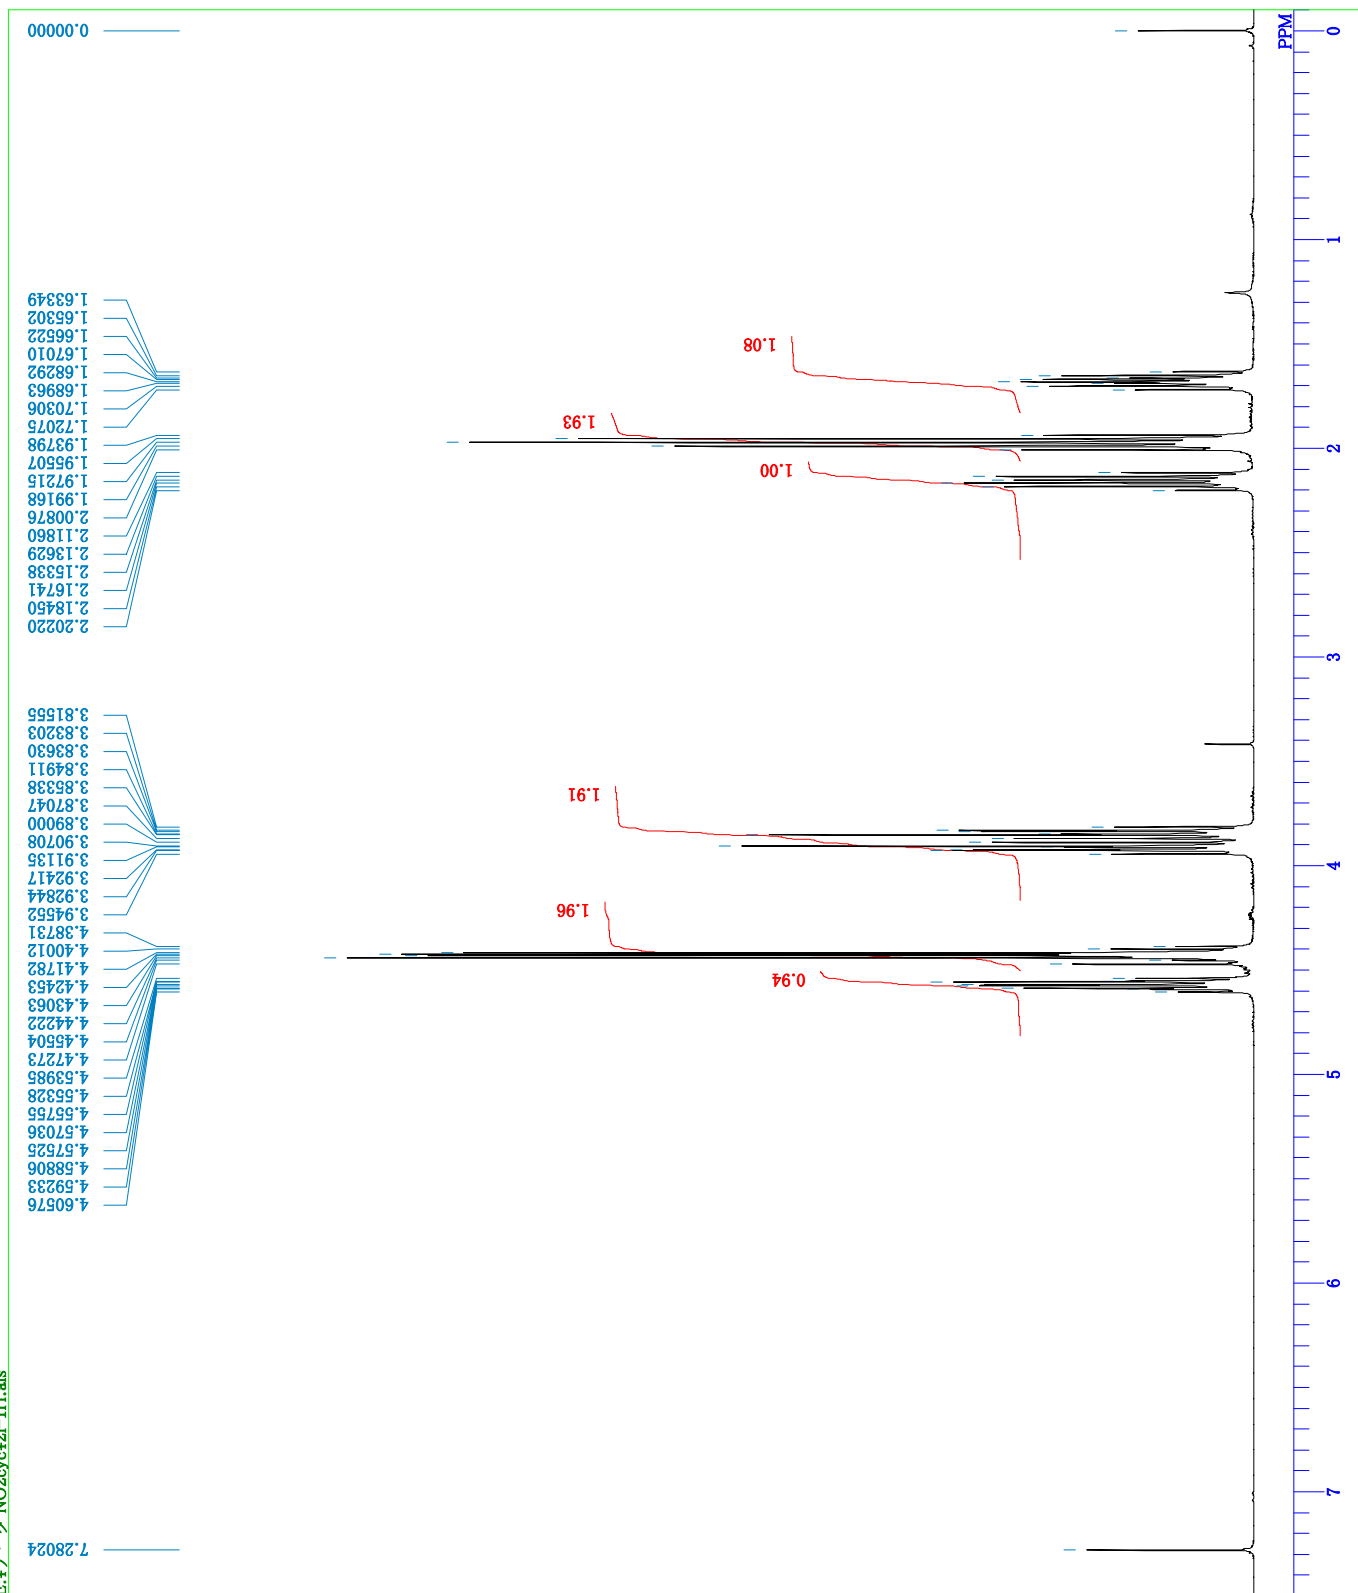

091209

E:\データ\NO2\cyc21-C.acs

DFILE  
COMINT  
DATIM  
OBNUC  
EXMOD  
OBFRQ  
OBSET  
OBFIN  
POINT  
FREQU  
SCANS  
ACQTM  
PD  
PW1  
IRNUC  
CTEMP  
SLVNT  
EXREF  
BF  
RGAIN

21-C.acs  
091209  
Wed Dec 09 16:18:57 2009  
13C  
bcm  
100.40 MHz  
0.00 KHz  
135500.00 Hz  
32768  
27100.27 Hz  
257  
1.2091 sec  
1.7909 sec  
4.90 usec  
1H  
23.0 c  
CDCL3  
77.00 ppm  
0.16 Hz  
26

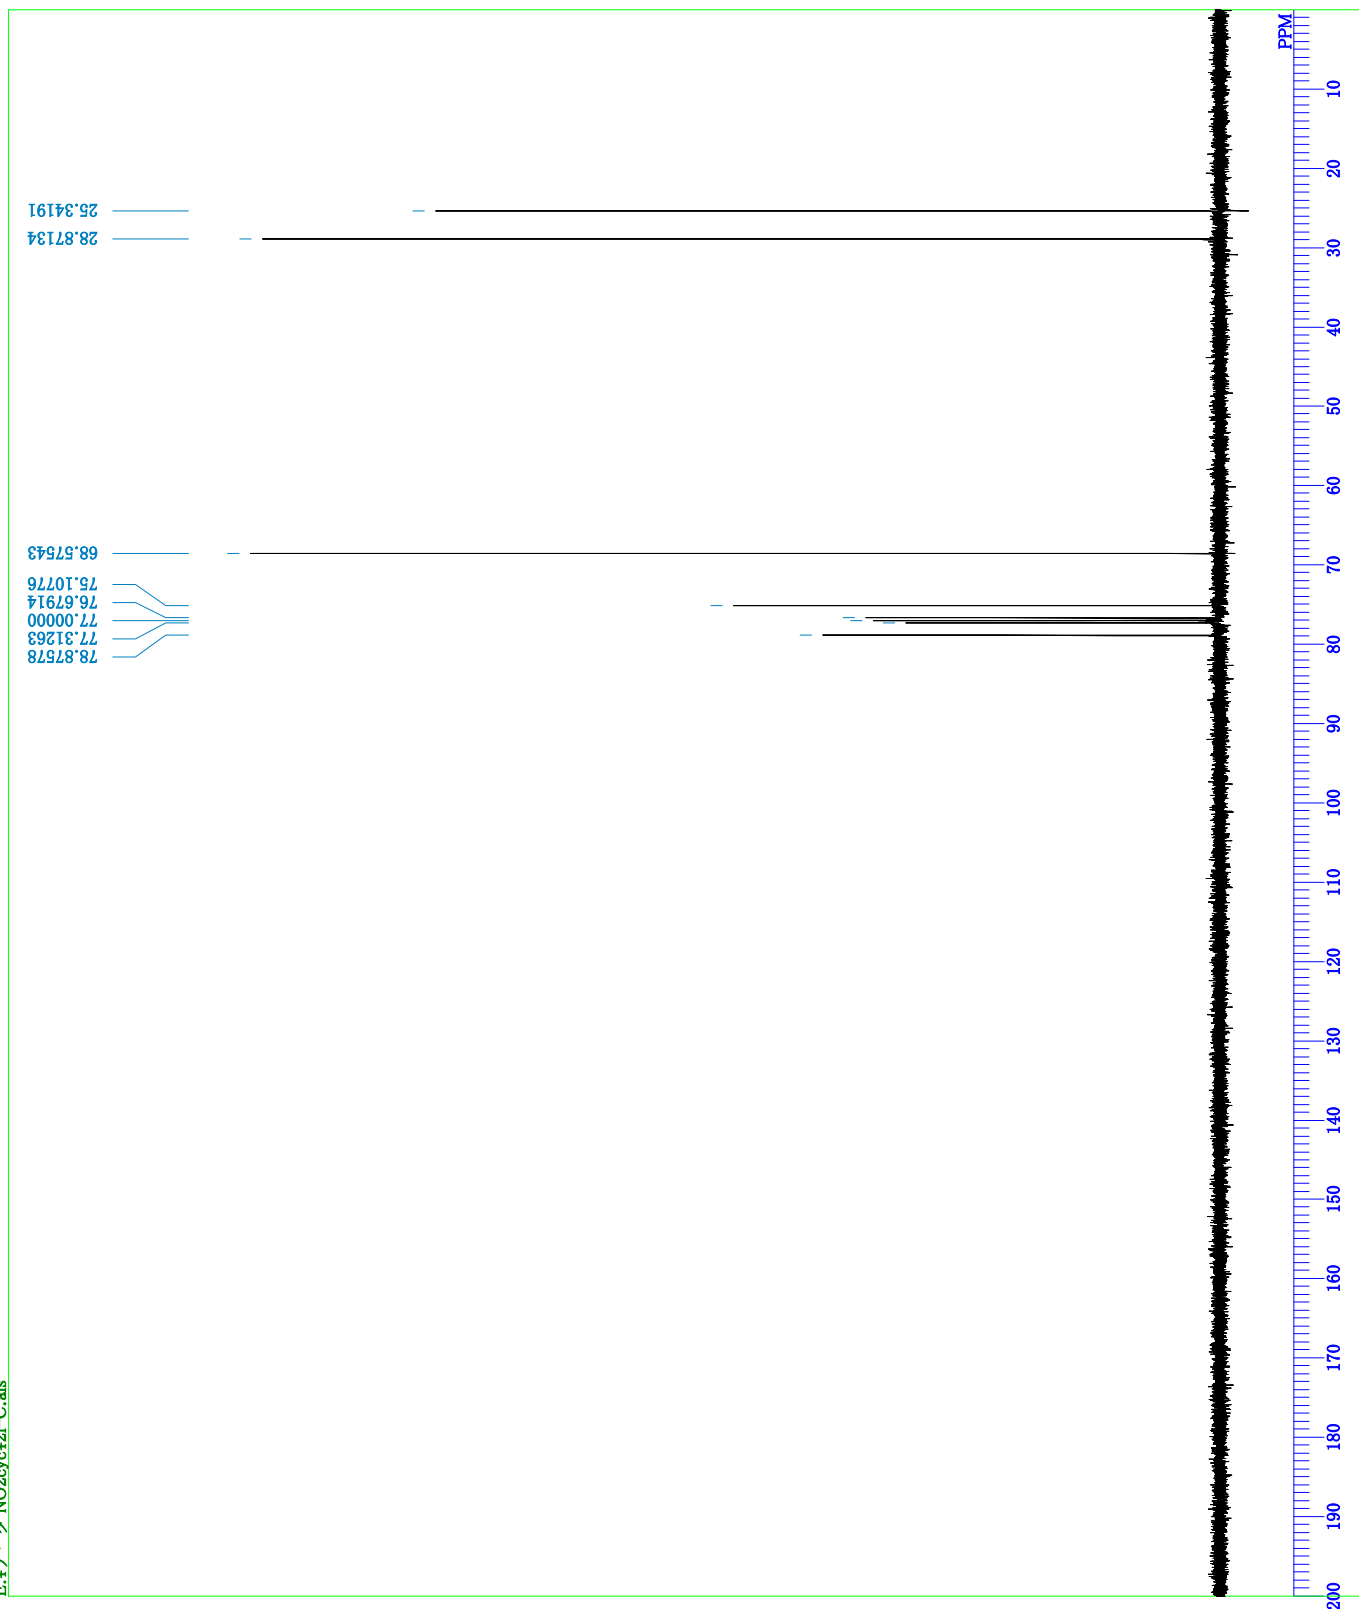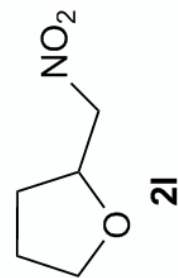



2m-1H.als  
 091205  
 Sat Dec 05 14:33:53 2009  
 1H  
 non  
 399.65 MHz  
 0.00 KHz  
 134300.00 Hz  
 32768  
 7993.60 Hz  
 16  
 4.0993 sec  
 2.9007 sec  
 6.80 usec  
 1H  
 21.7 c  
 CDCL3  
 0.00 ppm  
 0.12 Hz  
 14  
 RGAIN

DFILE  
 COMINT  
 DATIM  
 OBNUC  
 EXMOD  
 OBFREQ  
 OBSET  
 OBFIN  
 POINT  
 FREQU  
 SCANS  
 ACQTM  
 PD  
 PW1  
 IRNUC  
 CTEMP  
 SLYNT  
 EXREF  
 BF  
 RGAIN

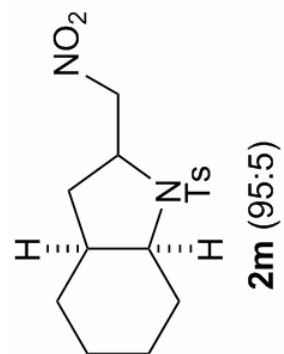

2m (95:5)

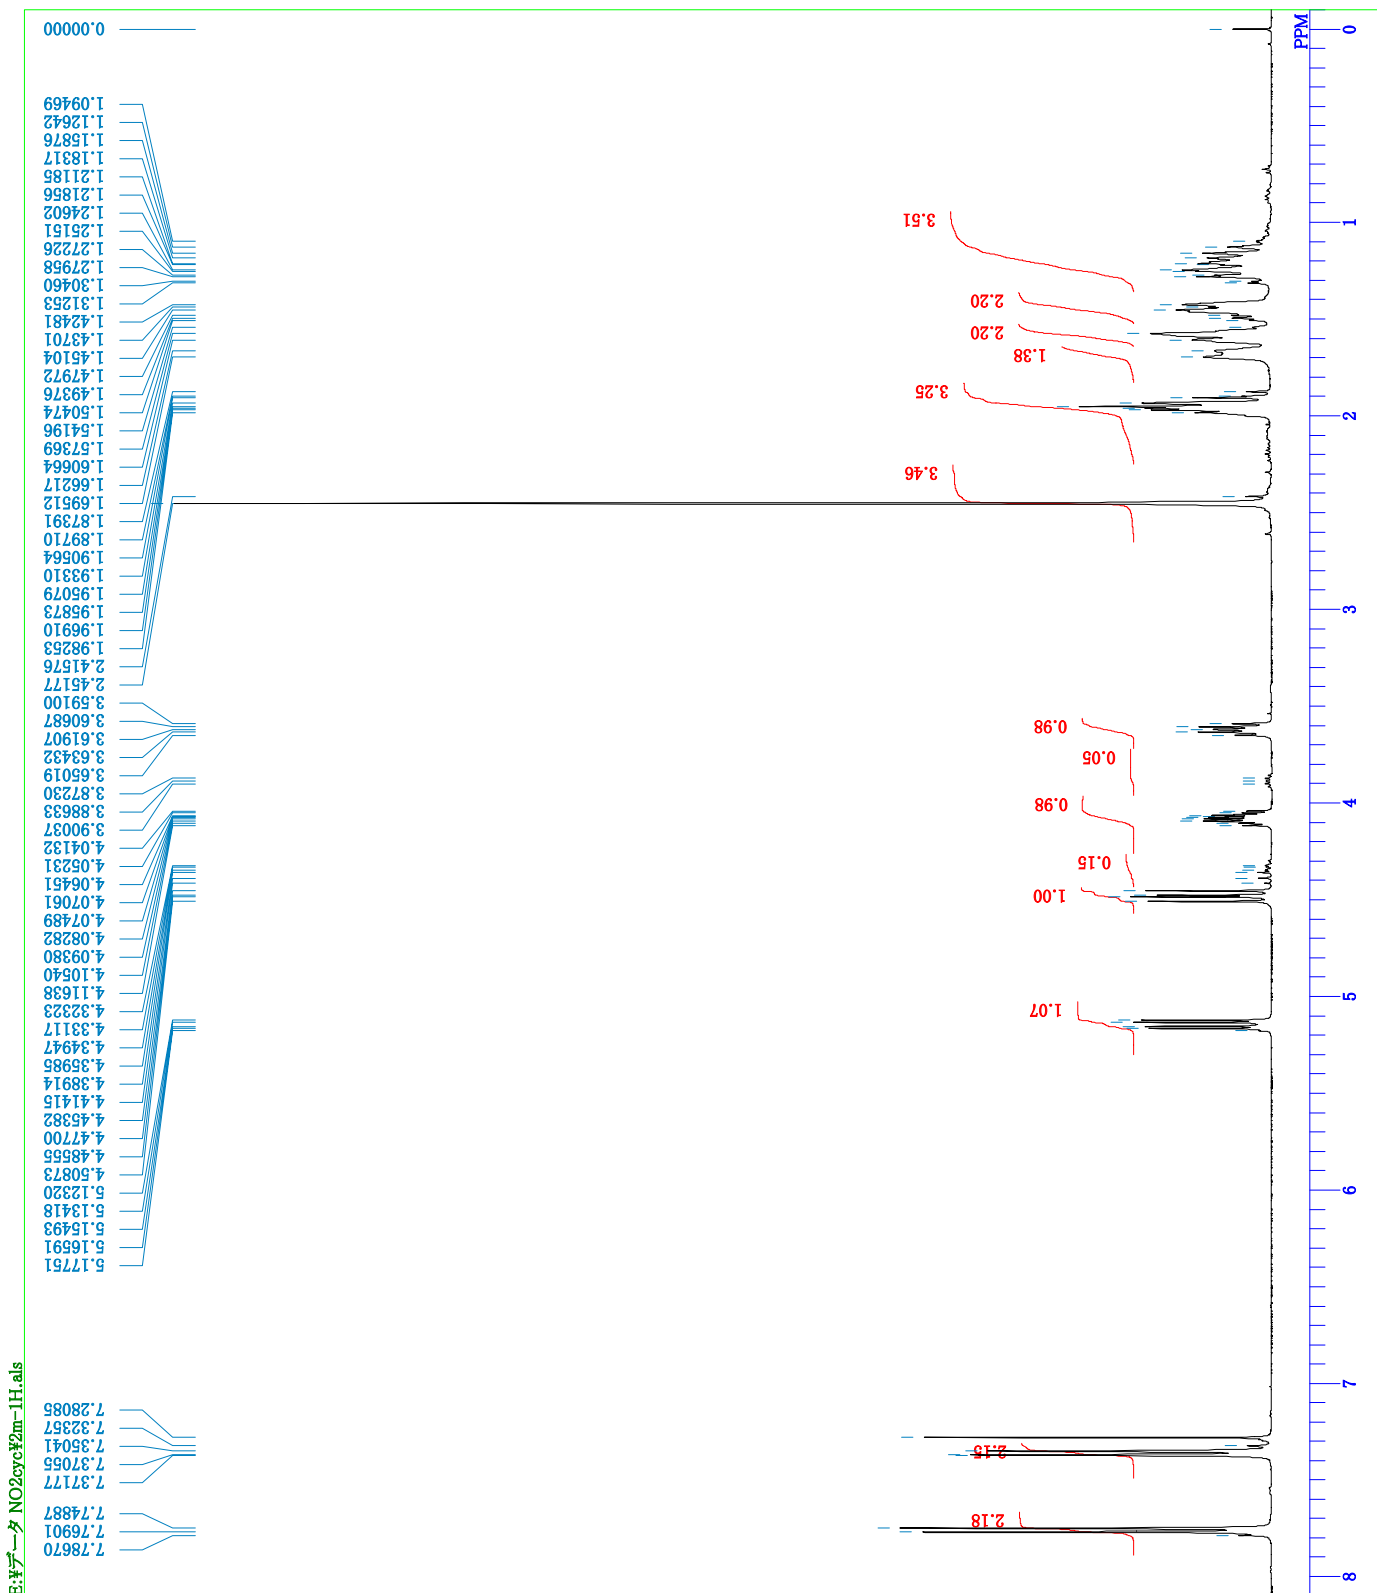

091205

E: 3. 1. 2011 NO2cyrc#2m-C.als

2m-C.als  
091205  
Sat Dec 05 14:47:29 2009  
13C  
bcm  
100.40 MHz  
0.00 KHz  
135500.00 Hz  
32768  
27100.27 Hz  
258  
1.2091 sec  
1.7909 sec  
4.90 usec  
1H  
23.5 c  
CDCL3  
77.00 ppm  
0.12 Hz  
26  
RGAIN

DFILE  
COMINT  
DATIM  
OBNUC  
EXMOD  
OBFRQ  
OBSET  
OBFIN  
POINT  
FREQU  
SCANS  
ACQTM  
PD  
PW1  
IRNUC  
CTEMP  
SLVNT  
EXREF  
BF  
RGAIN

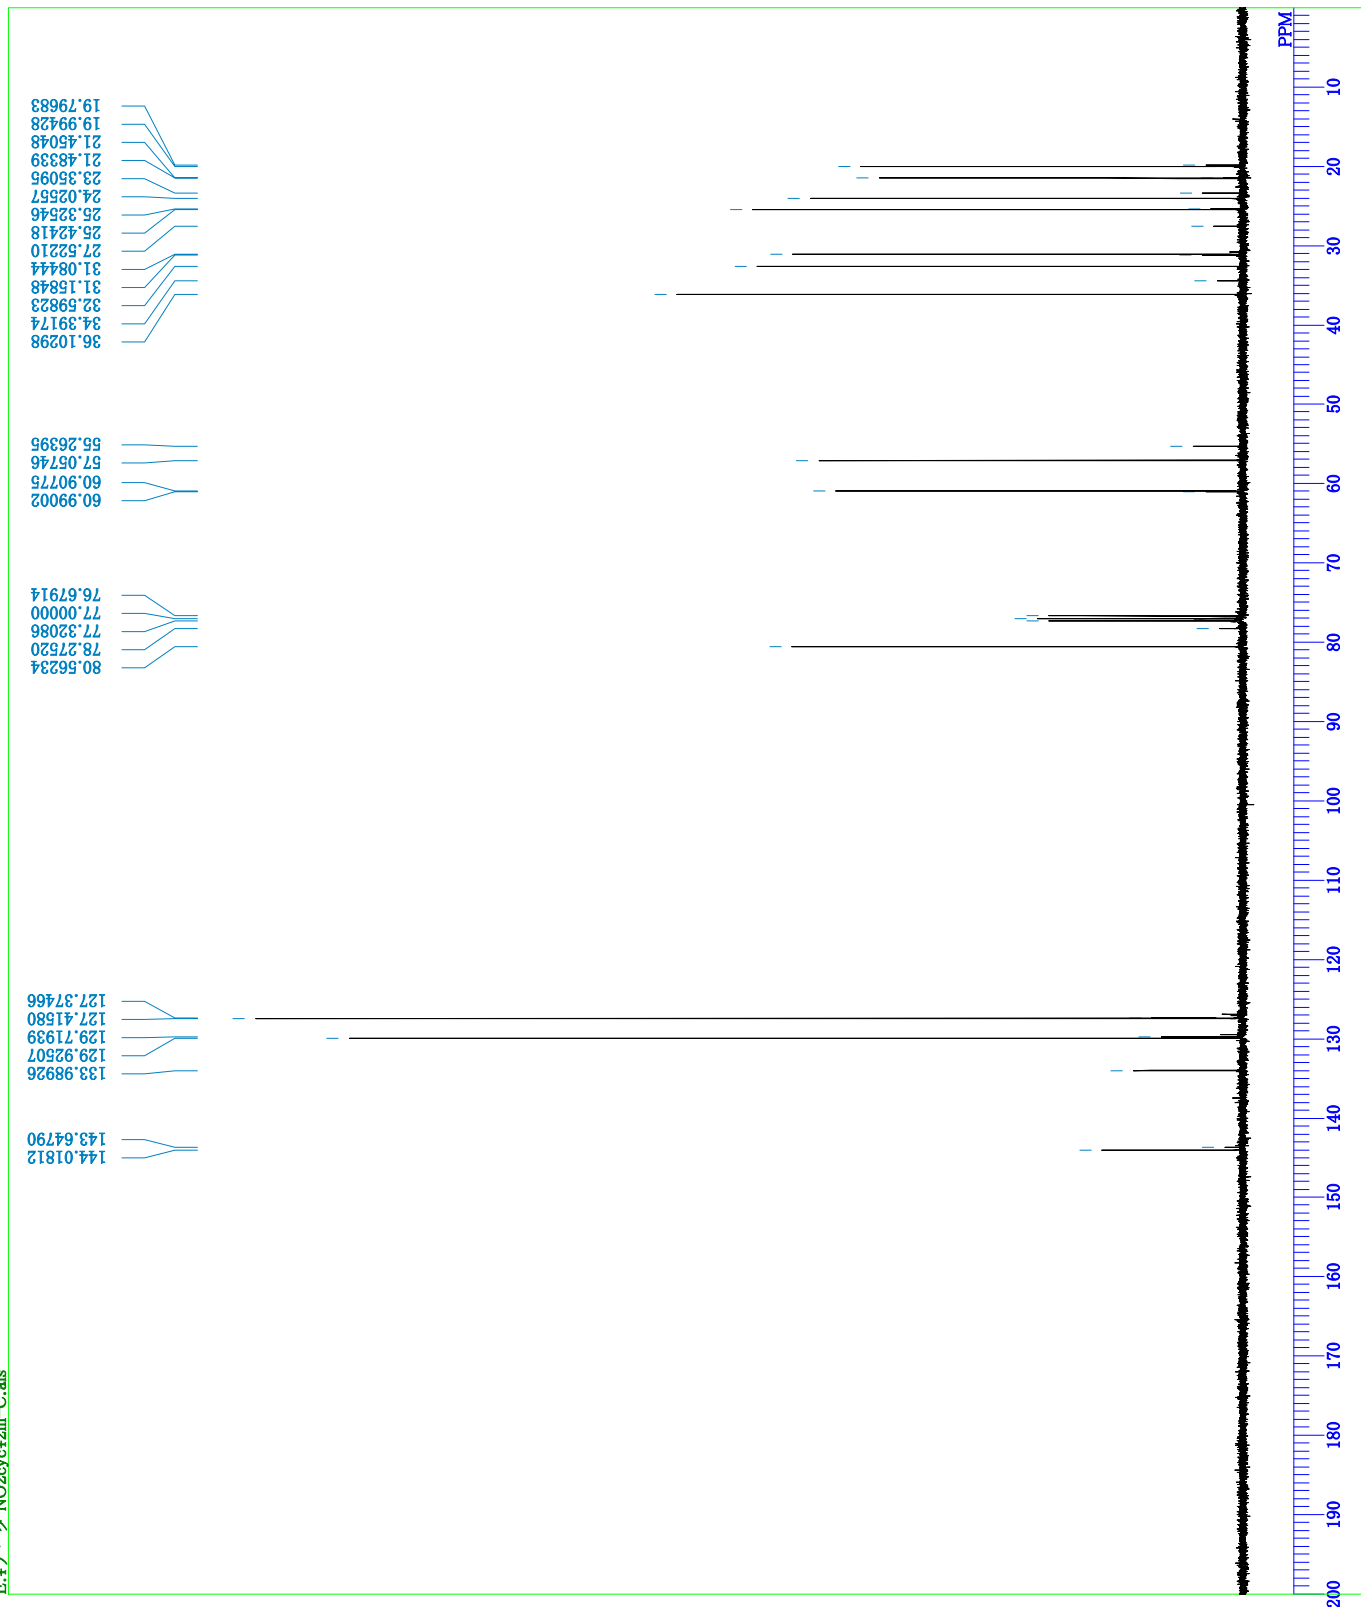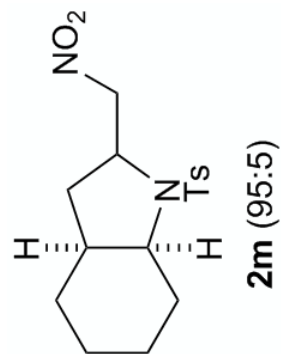

091207

E:\3-アミノチアノキノリン-2-イル-1H.als

DFILE 091207  
 COMINT Mon Dec 07 17:10:07 2009  
 DATIM 1H  
 OBNUC non  
 EXMOD 399.65 MHz  
 OBFRQ 0.00 KHz  
 OBSET 134300.00 Hz  
 OBFIN 32768  
 POINT 7993.60 Hz  
 FREQU 16  
 SCANS 4.0993 sec  
 ACQTM 2.9007 sec  
 PD 6.80 usec  
 PW1 1H  
 IRNUC 20.6 c  
 CTEMP CDCL3  
 SLYNT 0.00 ppm  
 EXREF 0.16 Hz  
 BF 18  
 RGAIN

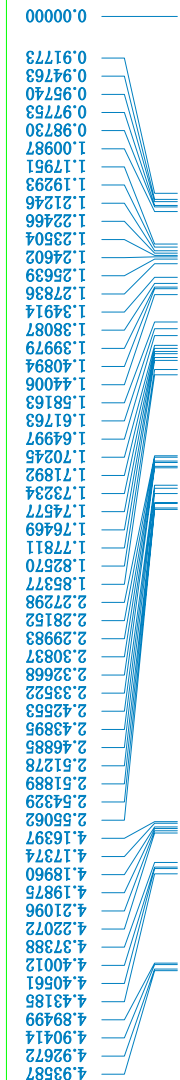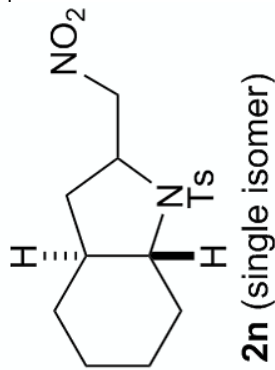

DFILE  
 COMINT  
 DATIM  
 OBNUC  
 EXMOD  
 OBFRQ  
 OBSET  
 OBFIN  
 POINT  
 FREQU  
 SCANS  
 ACQTM  
 PD  
 PW1  
 IRNUC  
 CTEMP  
 SLVNT  
 EXREF  
 BF  
 RGAIN

2n-C.als  
 091207  
 Mon Dec 07 17:23:42 2009  
 13C  
 bcm  
 100.40 MHz  
 0.00 KHz  
 135500.00 Hz  
 32768  
 27100.27 Hz  
 257  
 1.2091 sec  
 1.7909 sec  
 4.90 usec  
 1H  
 22.0 c  
 CDCL3  
 77.00 ppm  
 0.16 Hz  
 26

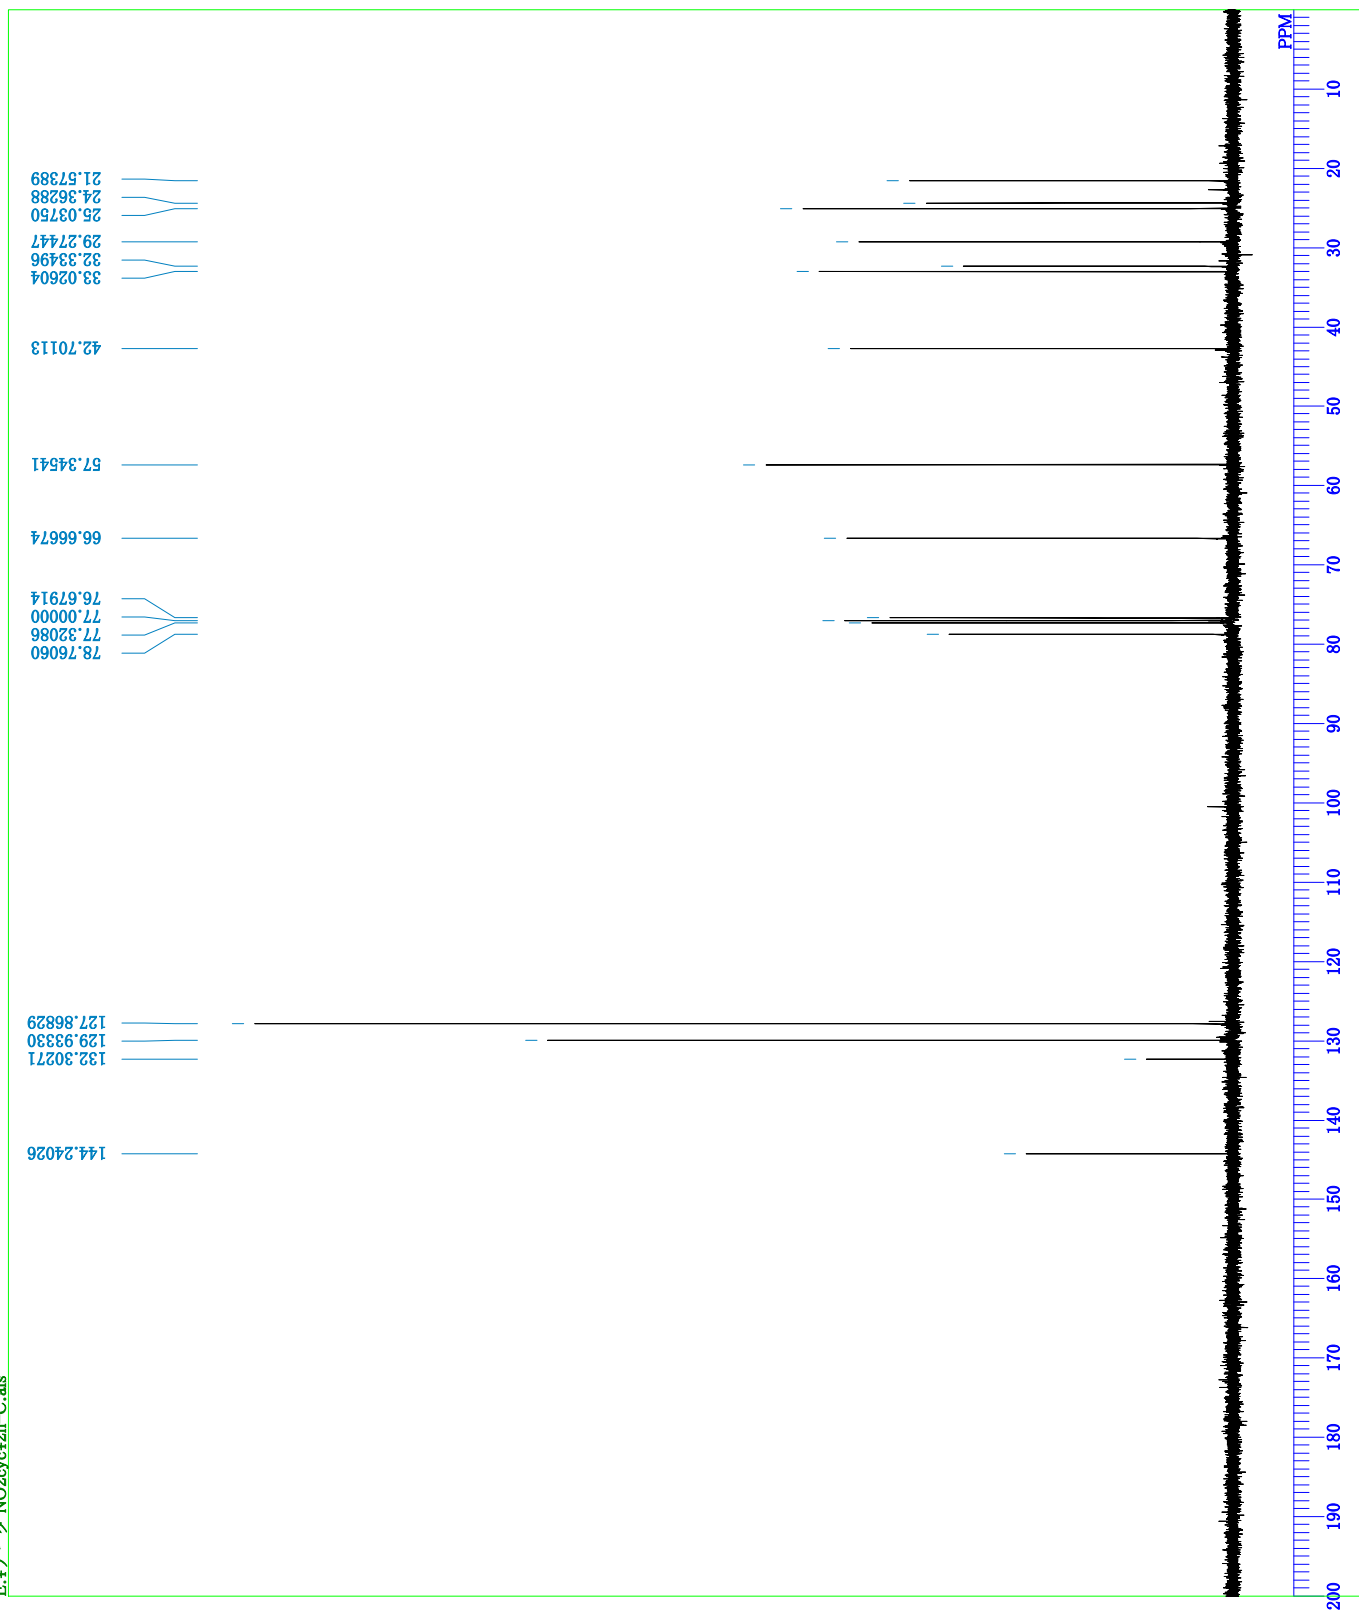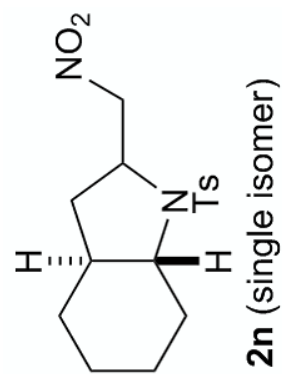

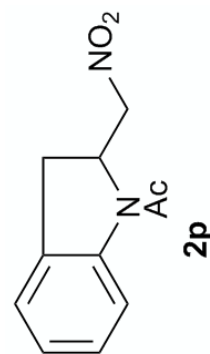

2p-1H.als  
single\_pulse  
04-12-2009 18:40:06  
1H  
single\_pulse.ex2  
399.78 MHz  
4.19 KHz  
7.29 Hz  
13107  
6002.31 Hz  
16  
2.1837 sec  
5.0000 sec  
4.90 usec  
1H  
20.3 c  
CDCL3  
0.00 ppm  
0.16 Hz  
50

DFILE  
COMINT  
DATIM  
OBNUC  
EXMOD  
OBFRQ  
OBSET  
OBFIN  
POINT  
FREQU  
SCANS  
ACQTM  
PD  
PW1  
IRNUC  
CTEMP  
SLVNT  
EXREF  
BF  
RGAIN

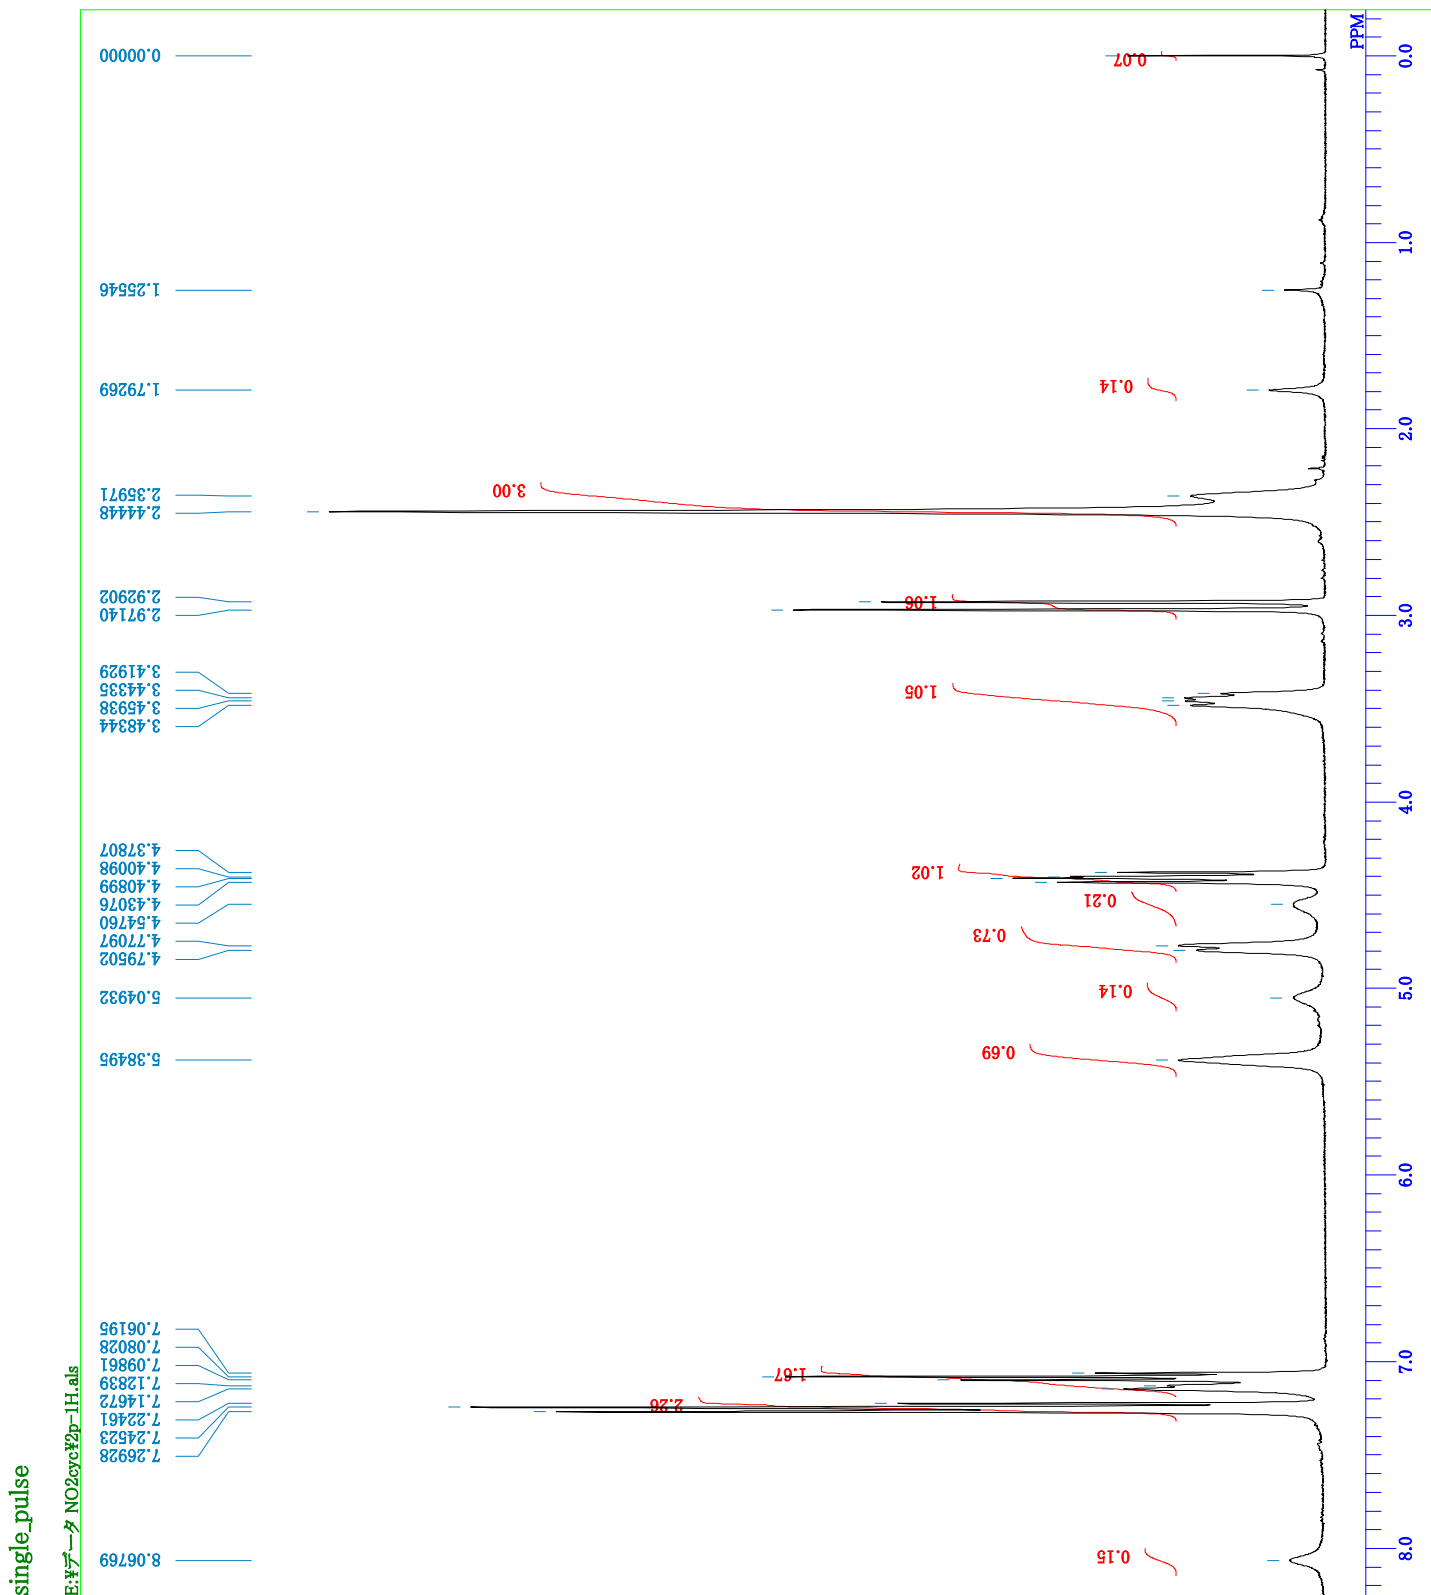

100220

E:3:3アーク NO2cyrc#2p-C.als

2p-C.als  
100220  
20-02-2010 14:54:46  
13C  
single\_pulse\_dec  
150.92 MHz  
8.52 KHz  
1.74 Hz  
26214  
37878.21 Hz  
1622  
0.6921 sec  
1.2000 sec  
4.00 usec  
1H  
20.2 c  
CDCL3  
77.00 ppm  
0.12 Hz  
56  
RGAIN

DFILE  
COMINT  
DATIM  
DANUC  
EXMOD  
OBFRQ  
OBSET  
OBFIN  
POINT  
FREQU  
SCANS  
ACQTM  
PD  
PW1  
IRNUC  
CTEMP  
SLVNT  
EXREF  
BF  
RGAIN

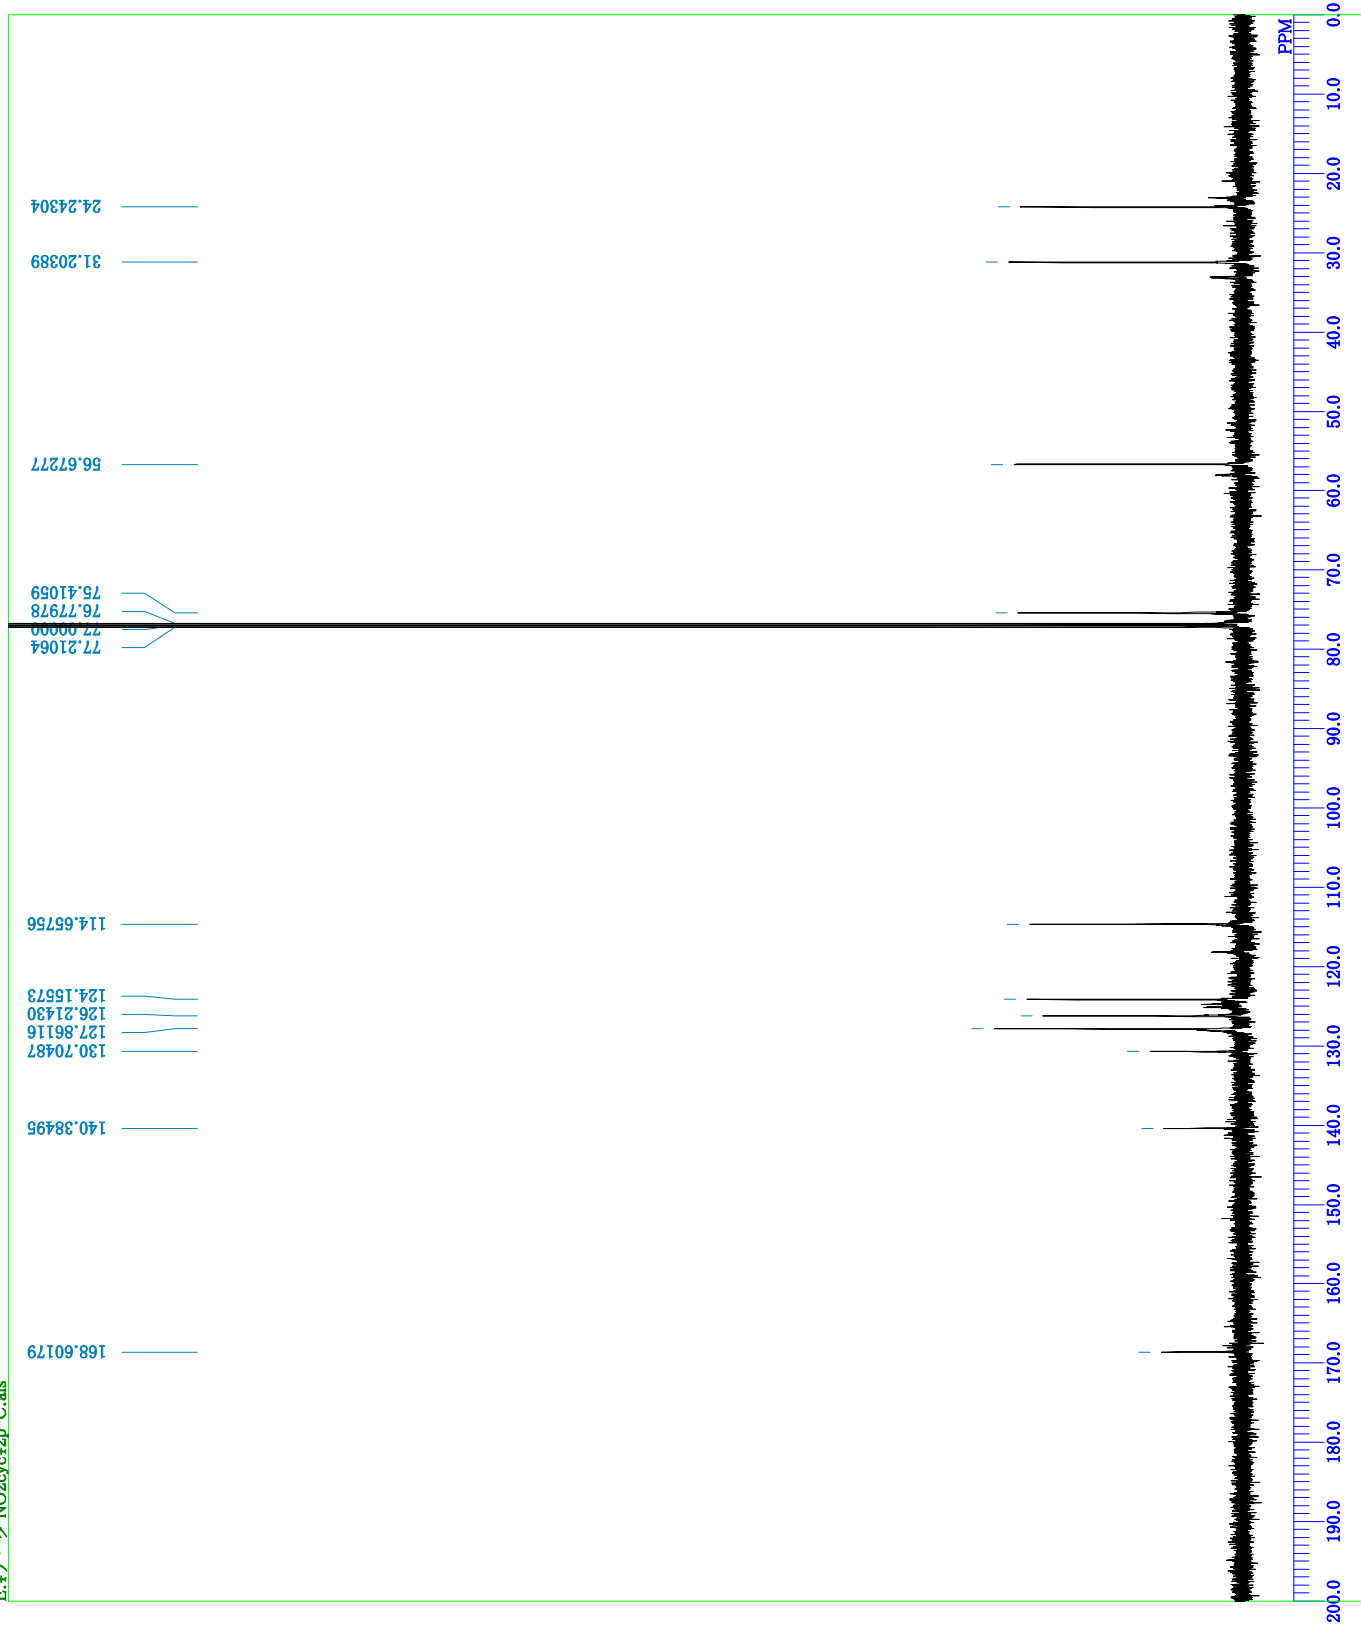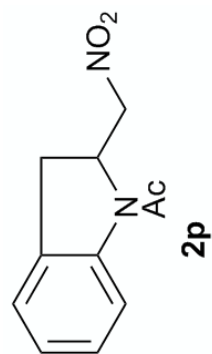

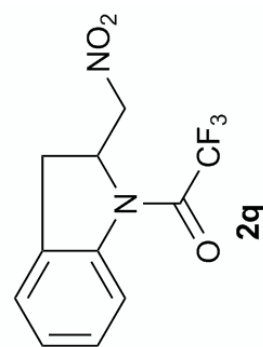

2q-1H.nls  
091208  
Tue Dec 08 23:00:28 2009  
1H  
non  
399.65 MHz  
0.00 KHz  
134300.00 Hz  
32768  
7993.60 Hz  
4.0993 sec  
2.9007 sec  
6.80 usec  
1H  
19.8 c  
CDCl3  
0.00 ppm  
0.16 Hz  
21

DFILE  
COMINT  
DATIM  
OBNUC  
EXMOD  
OBFRQ  
OBSET  
OBFIN  
POINT  
FREQU  
SCANS  
ACQTM  
PD  
PW1  
IRNUC  
CTEMP  
SLVNT  
EXREF  
BF  
RGAIN

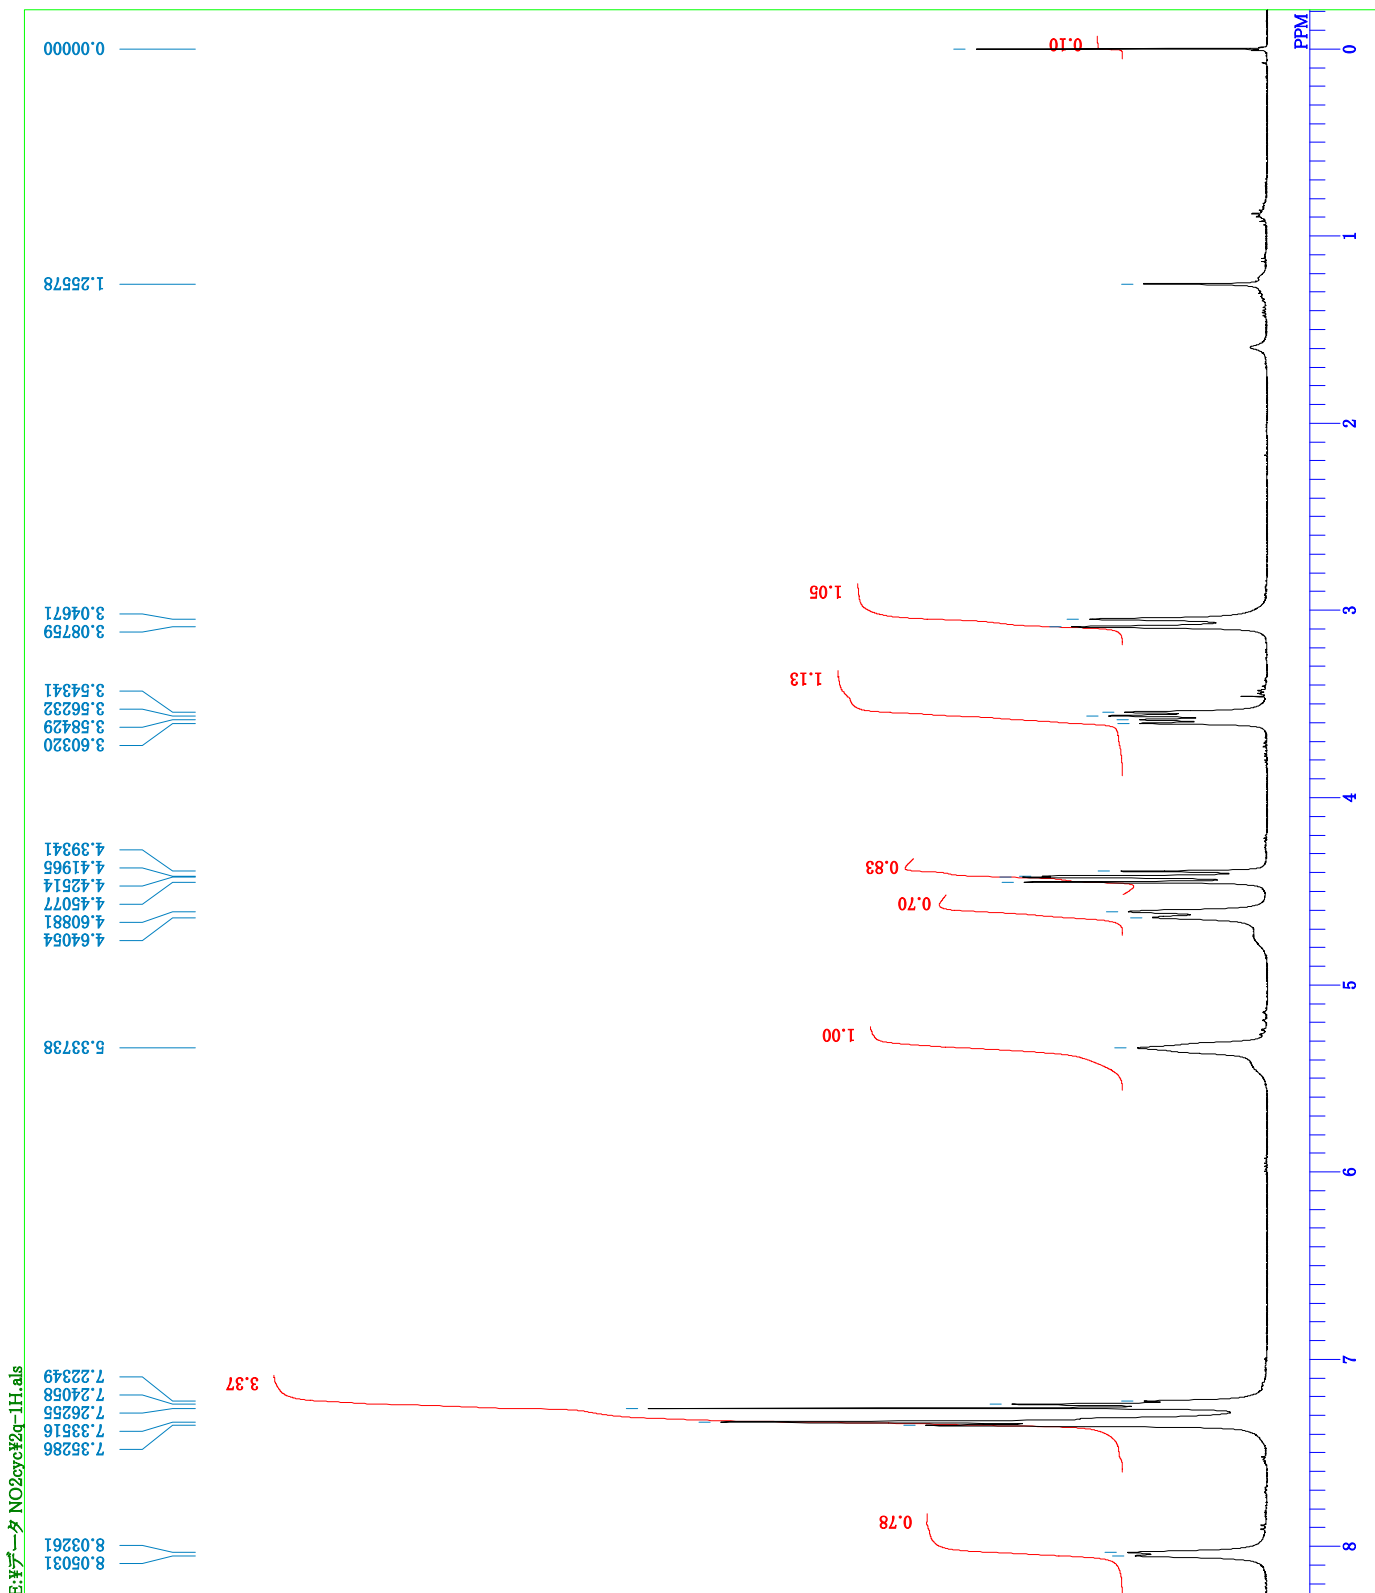

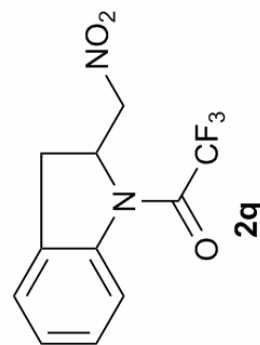

2q-C.als  
100226  
27-02-2010 08:56:33  
13C  
single\_pulse\_dec  
150.92 MHz  
8.52 KHz  
1.74 Hz  
26214  
37878.21 Hz  
18981  
0.6921 sec  
1.2000 sec  
4.00 usec  
1H  
21.0 c  
CDCl3  
0.00 ppm  
0.12 Hz  
56

DFILE  
COMINT  
DATIM  
OBNUC  
EXMOD  
OBFRQ  
OBSET  
OBSET  
POINT  
FREQU  
SCANS  
ACQTM  
PD  
PW1  
IRNUC  
CTEMP  
SLVNT  
EXREF  
BF  
RGAIN

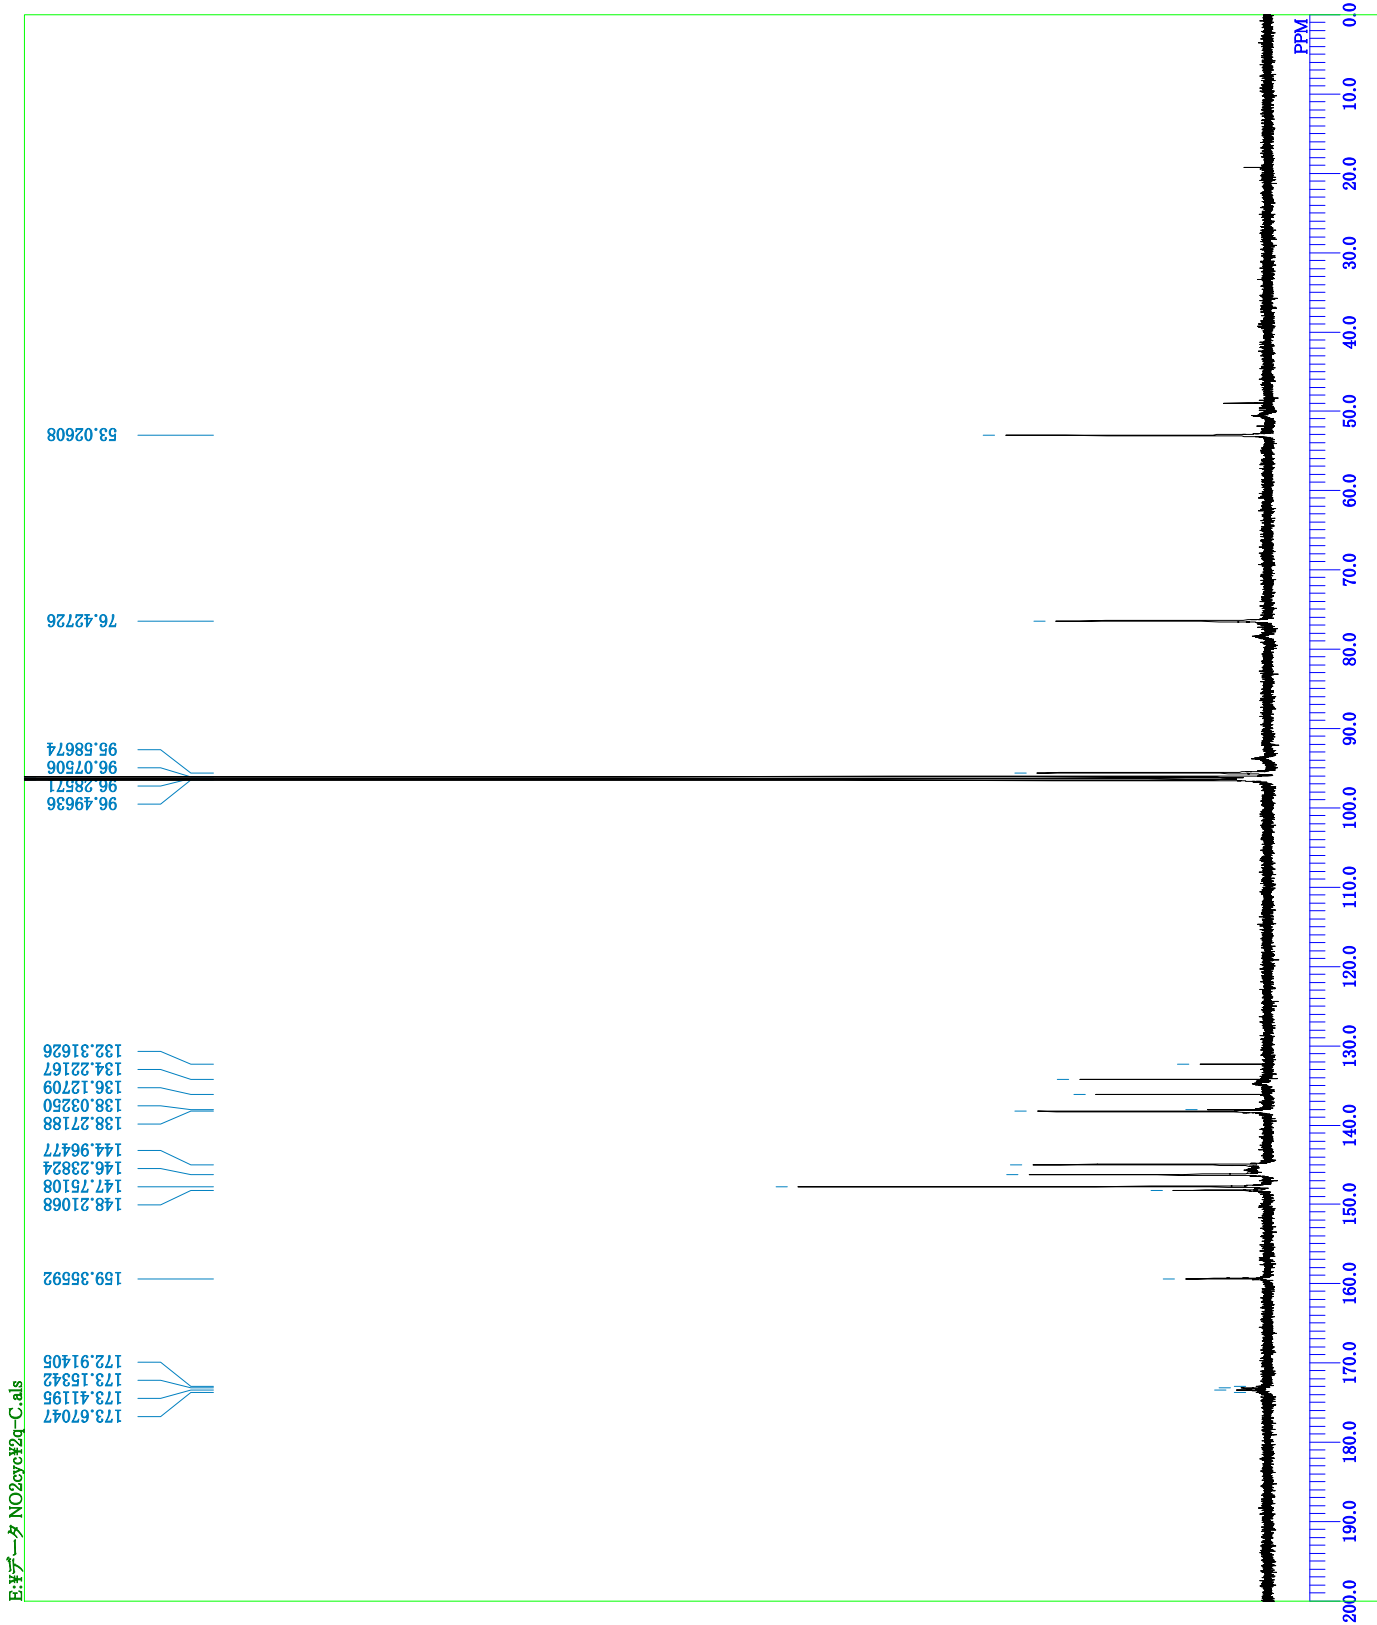



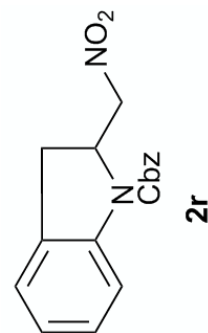

2r-1H.nls  
 100222  
 22-02-2010 15:36:45  
 1H  
 single\_pulse.ex2  
 600.17 MHz  
 5.30 KHz  
 5.47 Hz  
 13107  
 9008.87 Hz  
 16  
 1.4549 sec  
 2.0000 sec  
 6.50 usec  
 1H  
 21.0 c  
 CDCl3  
 0.00 ppm  
 0.25 Hz  
 44  
 RGAIN

DFILE  
 COMINT  
 DATIM  
 OBNUC  
 EXMOD  
 OBFRQ  
 OBSET  
 OBFIN  
 POINT  
 FREQU  
 SCANS  
 ACQTM  
 PD  
 PW1  
 IRNUC  
 CTEMP  
 SLVNT  
 EXREF  
 BF  
 RGAIN

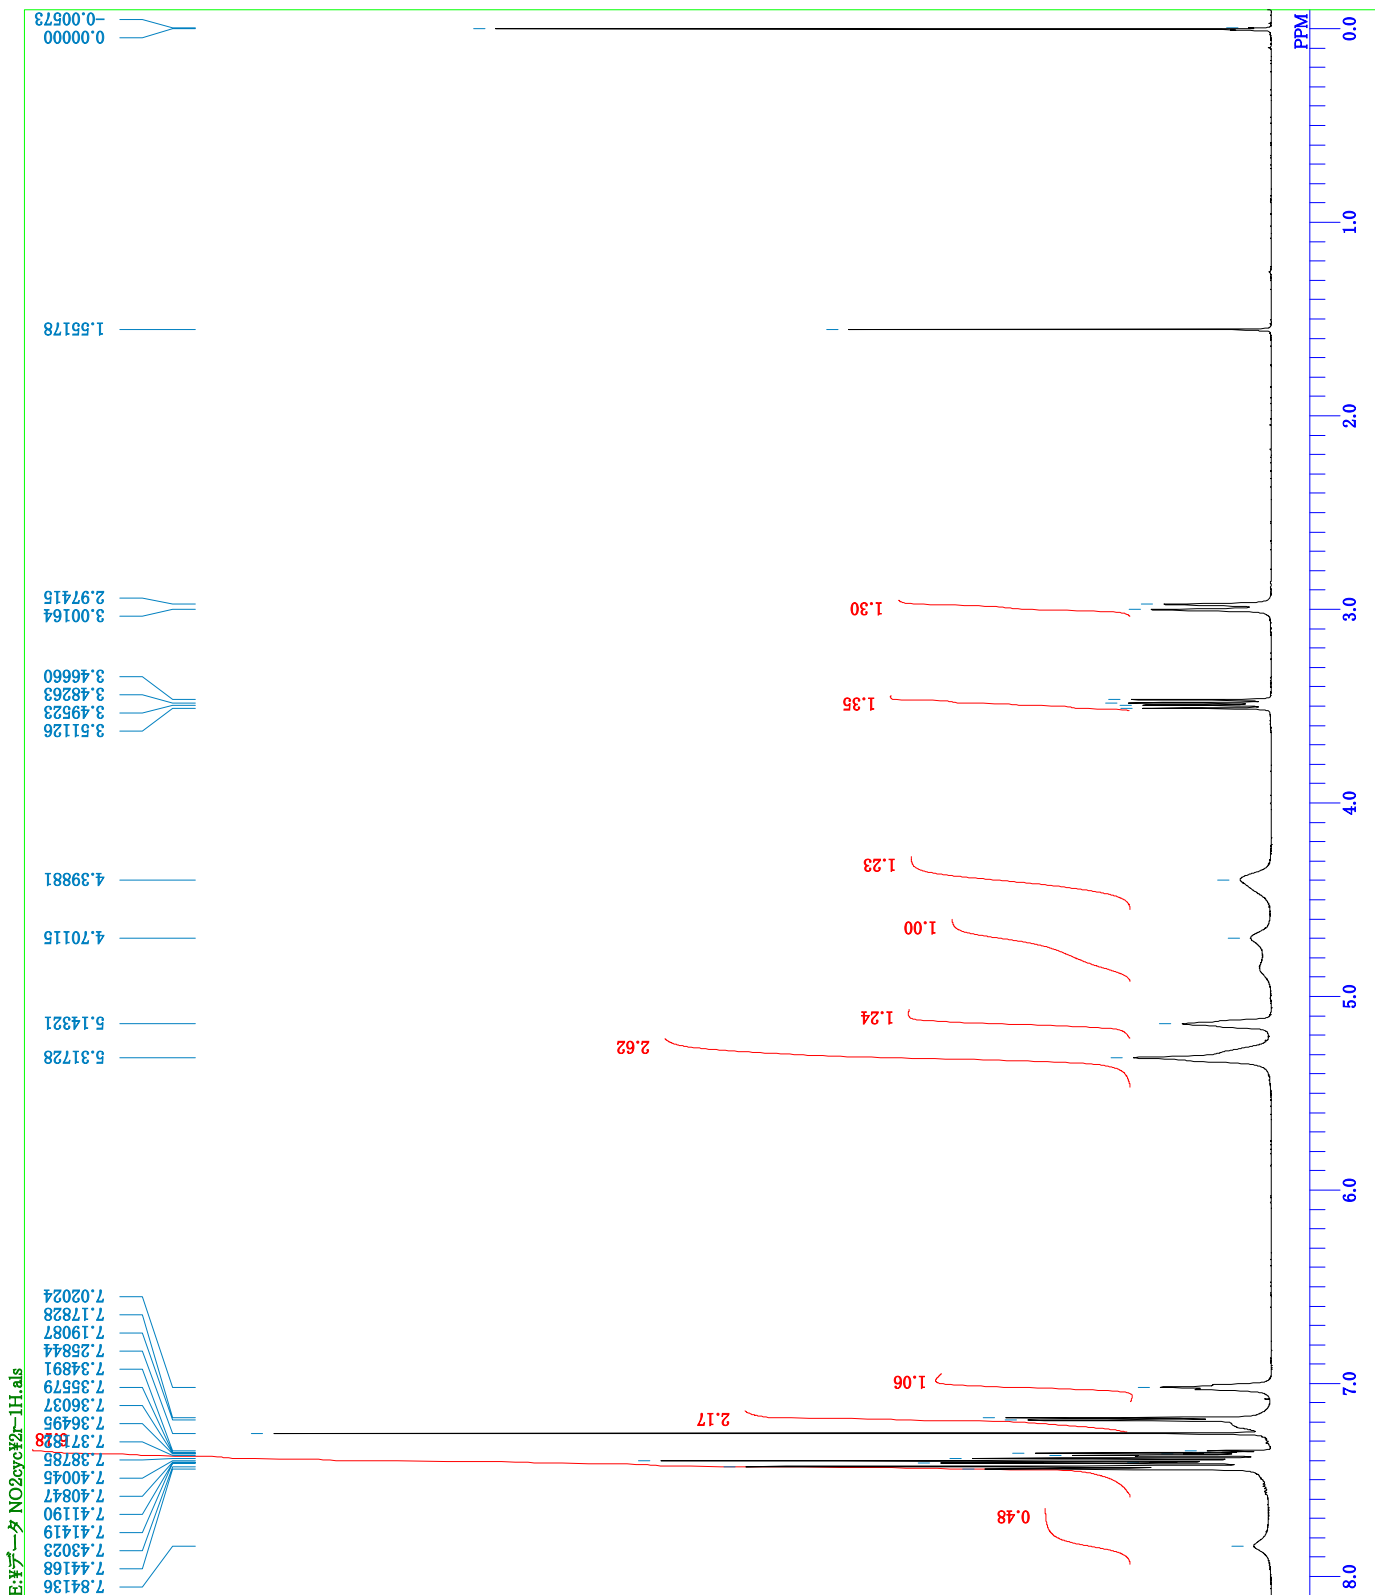

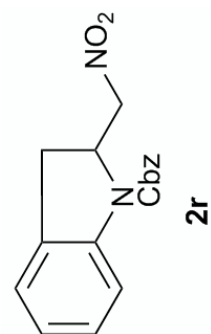

2r-C.als  
100304  
05-03-2010 08:53:12  
13C  
single\_pulse\_dec  
150.92 MHz  
8.52 KHz  
1.74 Hz  
20970  
30302.11 Hz  
20248  
0.6921 sec  
1.2000 sec  
4.00 usec  
1H  
20.9 c  
CDCL3  
0.00 ppm  
0.25 Hz  
56  
RGAIN

DFILE  
COMINT  
DATIM  
OBNUC  
EXMOD  
OBFRQ  
OBSET  
OBFIN  
POINT  
FREQU  
SCANS  
ACQTM  
PD  
PW1  
IRNUC  
CTEMP  
SLVNT  
EXREF  
BF  
RGAIN

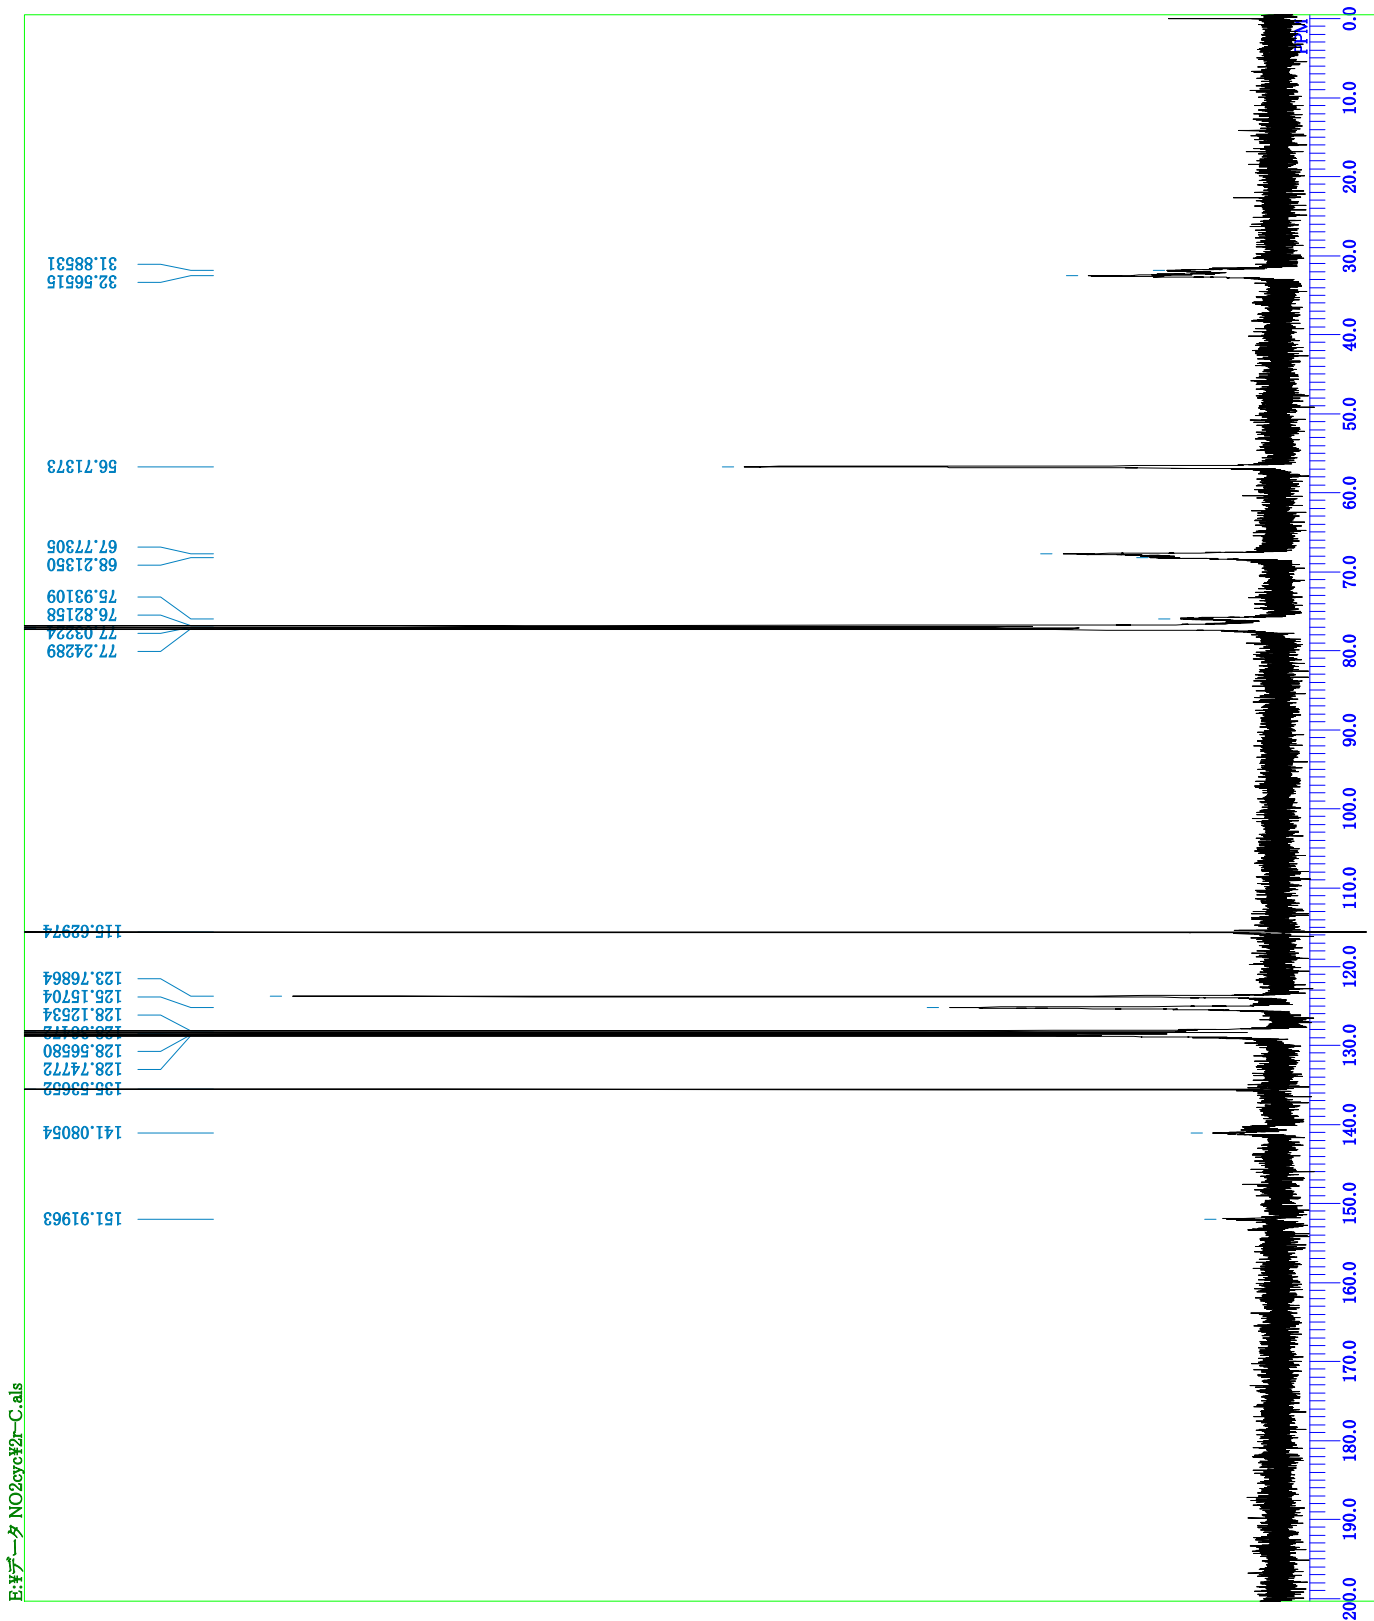

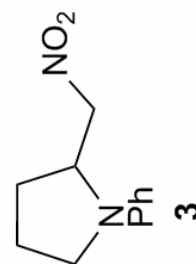

3-1H.nls  
100224  
24-02-2010 21:02:26  
1H  
single\_pulse.ex2  
600.17 MHz  
5.30 KHz  
5.47 Hz  
13107  
9008.87 Hz  
16  
1.4549 sec  
2.0000 sec  
6.50 usec  
1H  
22.1 c  
CDCl3  
0.00 ppm  
0.43 Hz  
44

DFILE  
COMINT  
DATIM  
OBNUC  
EXMOD  
OBFRQ  
OBSET  
OBFIN  
POINT  
FREQU  
SCANS  
ACQTM  
PD  
PW1  
IRNUC  
CTEMP  
SLVNT  
EXREF  
BF  
RGAIN

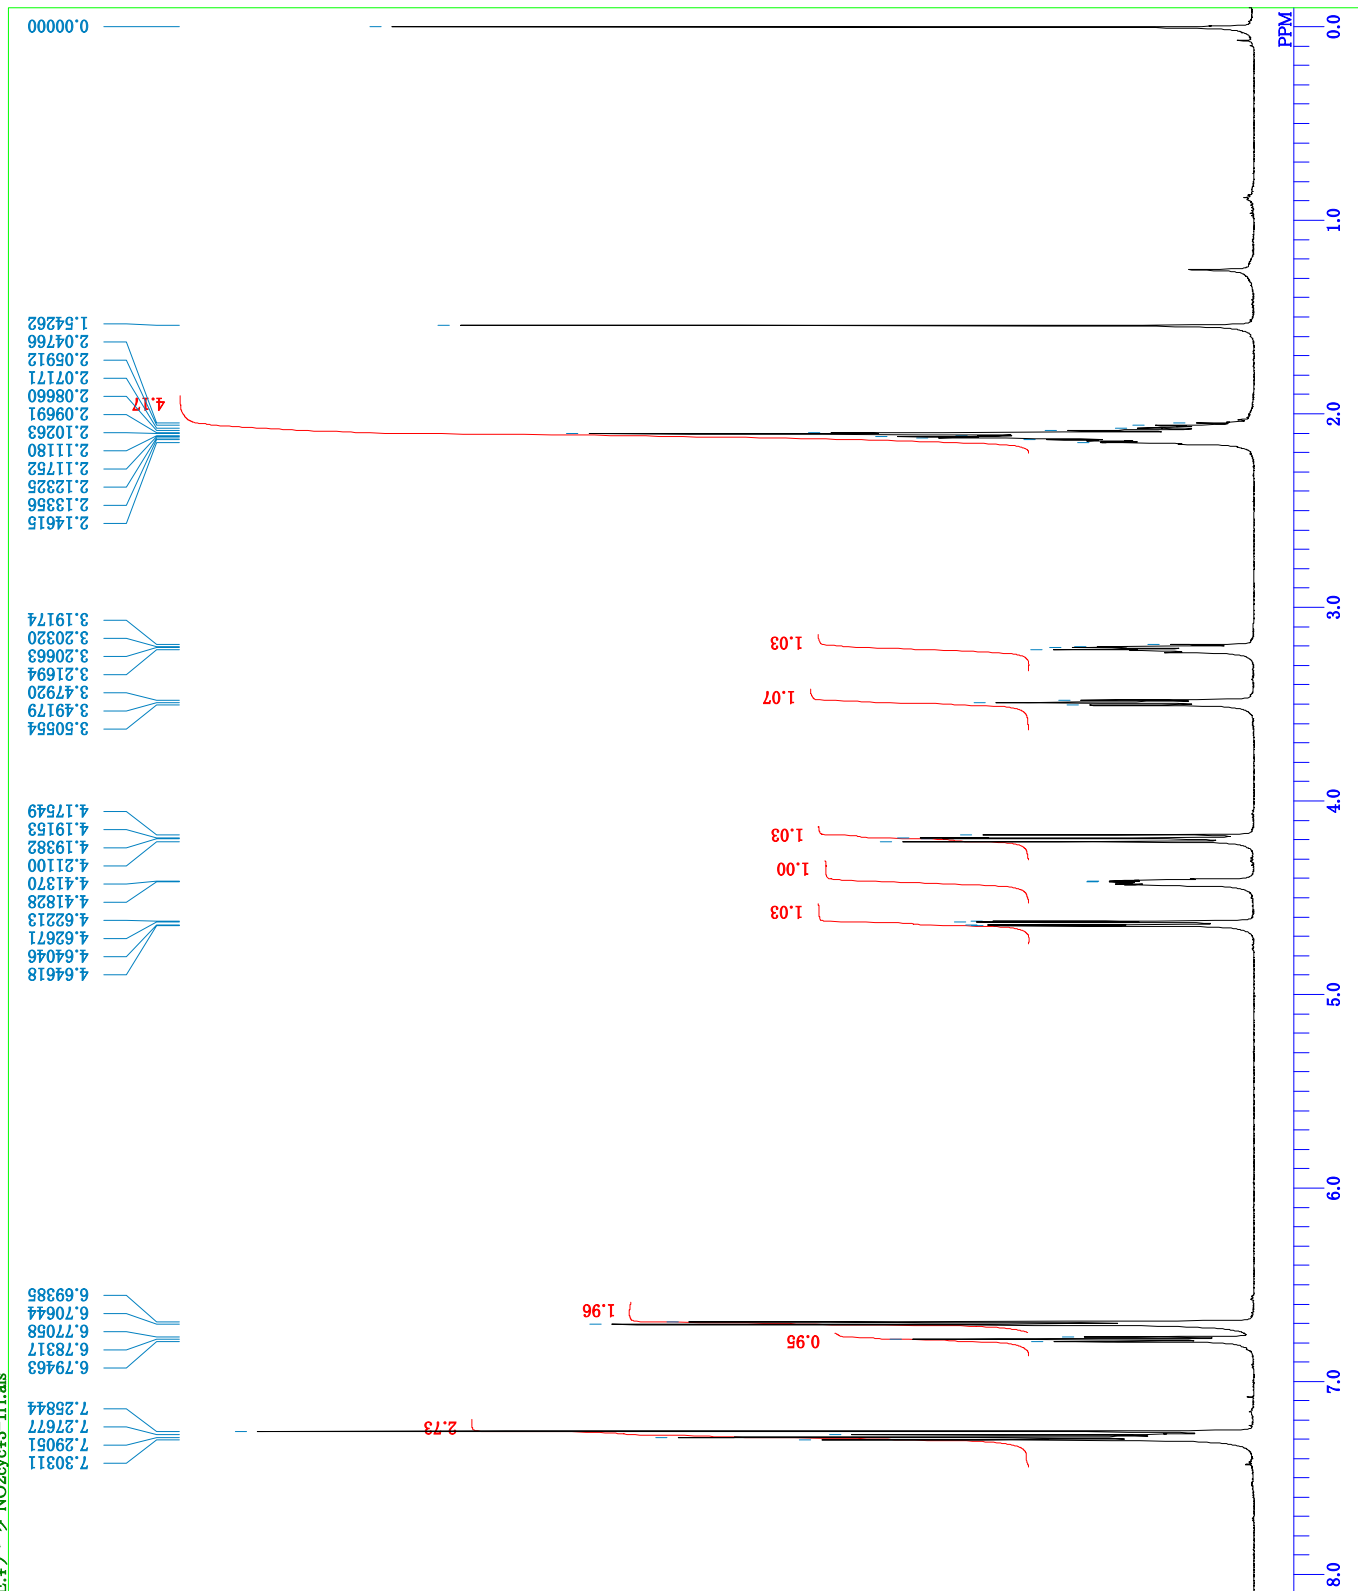

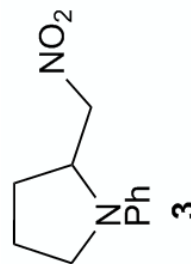

3-C.als  
100222  
22-02-2010 15:31:13  
13C  
single\_pulse\_dec  
150.92 MHz  
8.52 KHz  
1.74 Hz  
26214  
37878.21 Hz  
258  
0.6921 sec  
1.2000 sec  
4.00 usec  
IH  
21.6 c  
CDCl3  
77.00 ppm  
0.25 Hz  
56  
RGAIN

DFILE  
COMINT  
DATIM  
OBNUC  
EXMOD  
OBFRQ  
OBSET  
OBSF1  
POINT  
FREQU  
SCANS  
ACQTM  
PD  
PW1  
IRNUC  
CTEMP  
SLVNT  
EXREF  
BF  
RGAIN

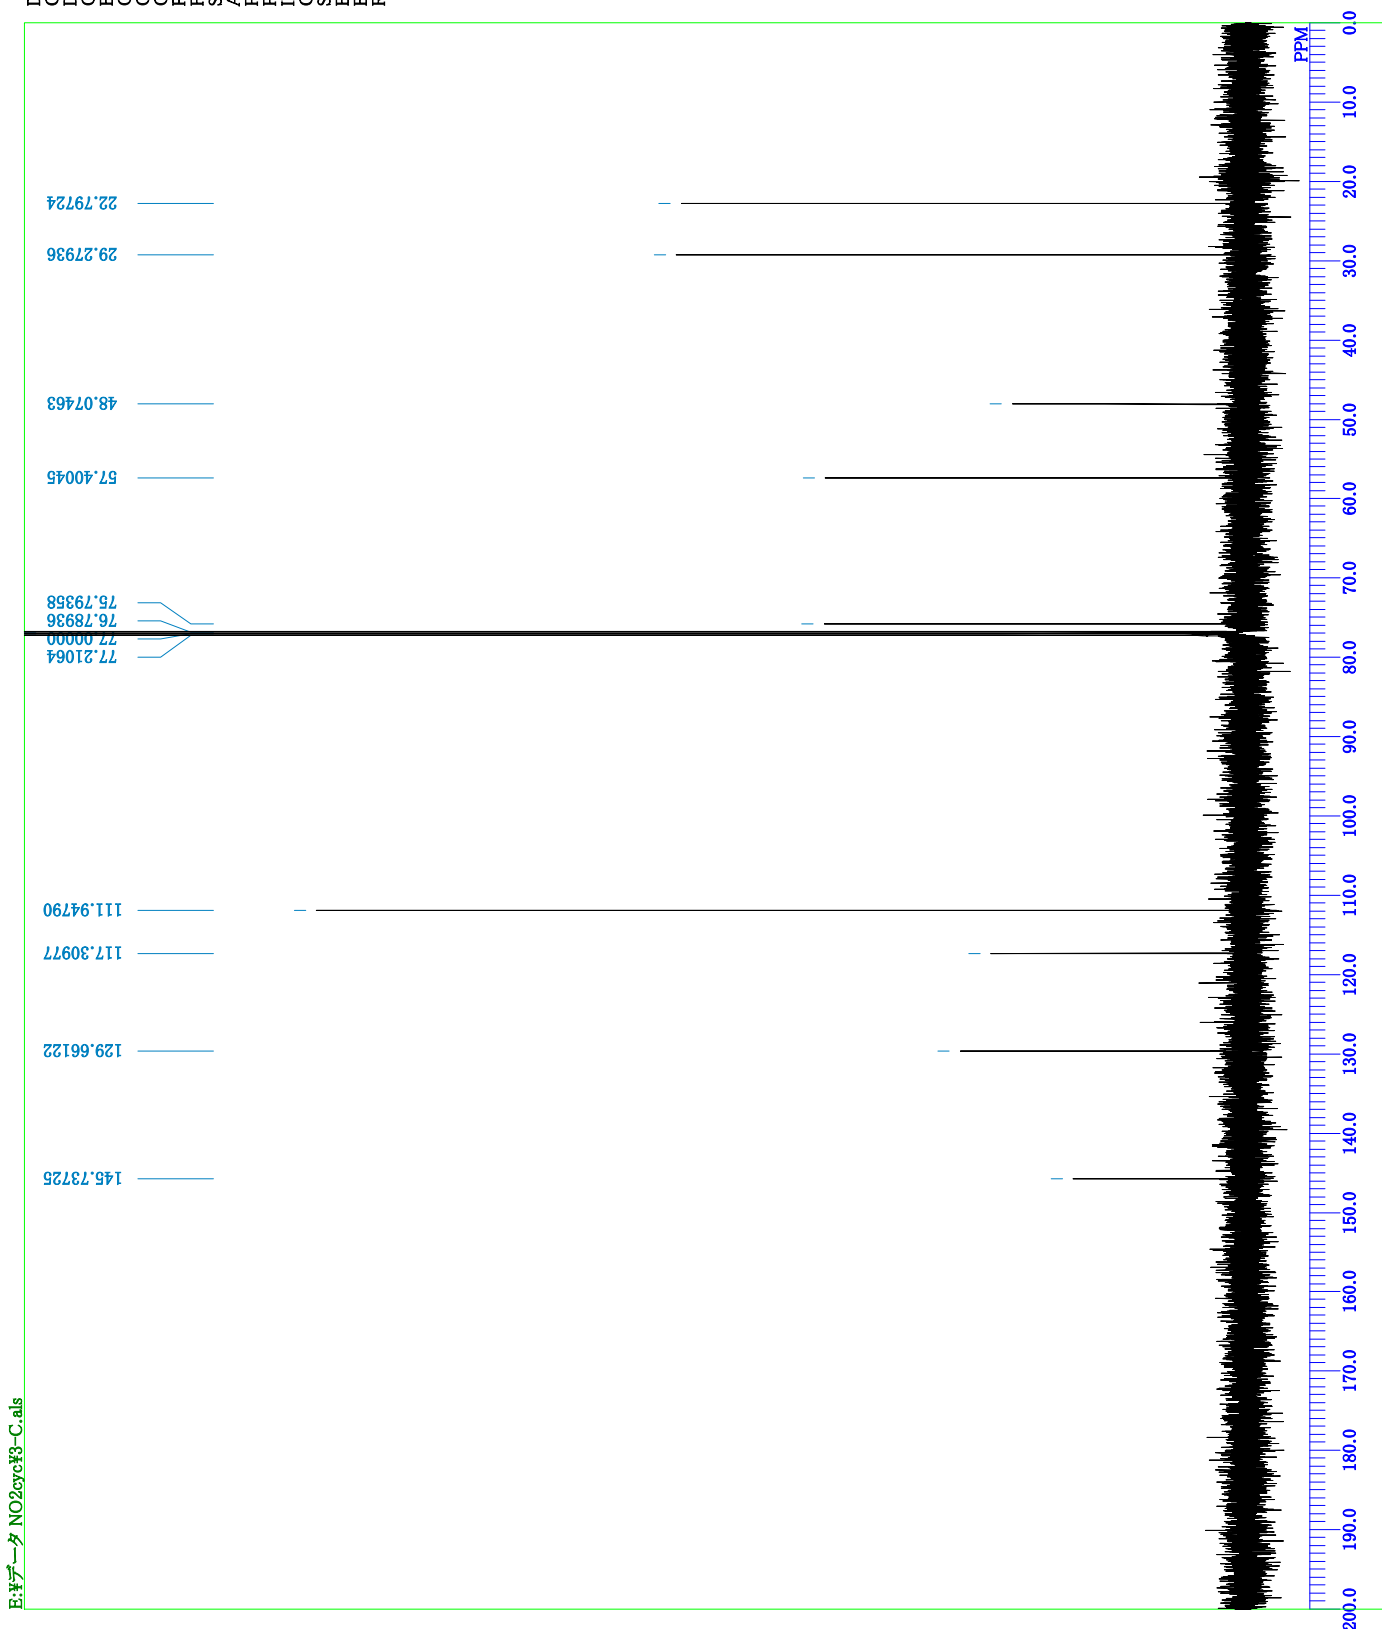

Supplement: c0ob00905a.pdf [file c0ob00905a.pdf]
